# Supplementary material for: Serum Metabolomic Profiling in Acute Alcoholic Hepatitis Identifies Multiple Dysregulated Pathways
Source: PLoS One. 2014 Dec 2;9(12):e113860. doi: 10.1371/journal.pone.0113860 (PMC4252257; doi:10.1371/journal.pone.0113860)
Supplement: Table S1 — Serum metabolite concentrations from patients with severe acute alcoholic hepatitis (hepatitis) and stable alcoholic cirrhosis (control). (XLSX) [file pone.0113860.s009.xlsx]

## Sheet: Sheet1
											SAMPLE_NAME	UPIT-00191	UPIT-00192	UPIT-00193	UPIT-00194	UPIT-00195	UPIT-00196	UPIT-00197	UPIT-00198	UPIT-00199	UPIT-00200	UPIT-00201	UPIT-00202	UPIT-00203	UPIT-00204	UPIT-00205	UPIT-00206	UPIT-00207	UPIT-00208	UPIT-00209	UPIT-00210	UPIT-00211	UPIT-00212	UPIT-00213	UPIT-00214	UPIT-00215	UPIT-00216	UPIT-00217	UPIT-00218	UPIT-00219	UPIT-00220	UPIT-00221	UPIT-00222	UPIT-00223	UPIT-00224	UPIT-00225	UPIT-00226	UPIT-00227	UPIT-00228
											SAMPLE_ID	1170937	1170938	1170939	1170940	1170941	1170942	1170943	1170944	1170945	1170946	1170947	1170948	1170949	1170950	1170951	1170952	1170953	1170954	1170955	1170956	1170957	1170958	1170959	1170960	1170961	1170962	1170963	1170964	1170965	1170966	1170967	1170968	1170969	1170970	1170971	1170972	1170973	1170974
											CLIENT_IDENTIFIER	LV1504	LV8704	LV11904	LV20104	LV26204	LV40004	LV34304	LV2104	LV8404	LV12604	LV20804	LV29204	LV42004	LV6204	LV9404	LV12904	LV25704	LV33804	LV48504	LV6304	LV9704	LV15904	LV22904	LV37204	LV48604	A0005	A0006	A0007	A0008	A0009	A0010	A0011	A0012	A0013	A0014	A0015	A0016	A0017
											RUN_DAY	1	2	2	1	1	2	2	1	1	2	2	1	1	2	2	1	1	2	2	1	1	2	2	1	1	1	2	2	1	1	2	2	1	1	2	2	1	1
PATHWAY_SORTORDER	BIOCHEMICAL	SUPER_PATHWAY	SUB_PATHWAY	COMP_ID	PLATFORM	RI	MASS	PUBCHEM	CAS	KEGG	Group HMDB_ID	Control	Control	Control	Control	Control	Control	Control	Control	Control	Control	Control	Control	Control	Control	Control	Control	Control	Control	Control	Control	Control	Control	Control	Control	Control	Hepatitis	Hepatitis	Hepatitis	Hepatitis	Hepatitis	Hepatitis	Hepatitis	Hepatitis	Hepatitis	Hepatitis	Hepatitis	Hepatitis	Hepatitis
1070	1,2-dipalmitoylglycerol	Lipid	Diacylglycerol	35727	GC/MS	2638.5	313.3	99931	40290-32-2;		HMDB07098	0.2968	0.2968	0.384	1.3812	0.2968	0.7534	0.2968	1.3873	0.2968	0.2968	1.2168	0.7659	2.0344	0.4911	0.2968	0.2968	0.2968	0.2968	0.2968	0.2968	0.9642	0.2968	1.0101	0.2968	0.2968	0.8699	1.4672	0.2968	0.2968	0.5541	1	0.868	0.2968	0.2968	0.819	0.2968	2.0992	1.0358
986	1,2-propanediol	Lipid	Ketone bodies	38002	GC/MS	1041	117		57-55-6;	C00583	HMDB01881	0.1787	0.3142	2.915	0.2837	0.056	1.0506	0.5338	0.2166	0.2731	2.2965	0.336	0.4416	0.1022	0.201	0.7469	1.0687	1.8681	0.1582	0.2876	0.4756	0.0791	0.1258	0.4028	0.1958	0.1361	1.1282	24.1928	52.9922	26.0817	1.1453	0.9494	4.9722	2.2316	1.8013	0.1382	2.0766	0.9313	4.2147
1071	1,3-dipalmitoylglycerol	Lipid	Diacylglycerol	35728	GC/MS	2637	371.3	68149	26657-95-4 ;			1.614	0.6873	0.2953	1.183	0.2953	1.771	1.4	1.4031	1.1786	1.6522	1.0171	0.4815	0.5668	0.2953	0.2953	1.4605	1.5874	0.2953	0.4471	0.2953	1.9912	0.2953	0.2953	0.7557	0.2953	0.2953	1.0988	0.2953	0.6873	0.2953	0.8501	1.6771	0.8214	0.6274	0.7041	0.7474	2.2723	0.5871
583	1,5-anhydroglucitol (1,5-AG)	Carbohydrate	Glycolysis, gluconeogenesis, pyruvate metabolism	20675	GC/MS	1788.7	217		154-58-5;	C07326	HMDB02712	0.381	1.3939	0.5358	0.9826	1.779	0.633	2.0516	0.4553	0.095	1.5766	1.7941	0.612	1.6385	0.8781	1.5485	1.3177	0.8952	0.9933	0.3828	0.6891	3.3416	1.2309	1.6345	1.0174	0.4519	1.7185	0.8444	1.0786	1.2237	3.1732	0.4546	2.1935	1.3102	1.4001	0.5284	1.18	1.0694	0.0325
591	1,6-anhydroglucose	Carbohydrate	Glycolysis, gluconeogenesis, pyruvate metabolism	21049	GC/MS	1679.5	204.1	11412545	498-07-7;		HMDB00640	1.2832	0.5201	5.2542	1.0613	1.6211	0.4167	1.1692	1.1527	1.1379	1.8992	2.0069	3.4447	0.3649	0.4546	3.0406	0.5091	0.5363	0.4886	0.4838	0.3649	0.6744	0.8631	3.9553	0.3649	0.3649	1	0.6136	0.7394	0.3649	0.6194	3.3365	4.4761	2.2699	0.6237	0.9456	1.0544	0.8287	2.2084
1803	1,7-dimethylurate	Xenobiotics	Xanthine metabolism	34400	LC/MS Neg	1607	195.1	91611	33868-03-0;	C16356	HMDB11103	0.2748	1.1773	0.2748	0.4635	1.6878	1.9038	1.0383	1.0181	0.9819	0.2748	1.8458	2.191	3.6232	1.3235	0.9617	0.2748	1.0867	2.0406	0.7401	0.3873	2.0923	0.2748	0.863	0.5268	0.2748	0.2748	0.2748	0.2748	0.2748	0.2748	0.2748	0.5051	0.5125	1.1973	0.2748	0.2748	0.2748	0.2748
1025	1-arachidonoylglycerophosphocholine*	Lipid	Lysolipid	33228	LC/MS Pos	5554	544.3			C05208		1.1971	1.8542	0.8694	0.7887	1.7326	0.2988	3.0523	1.6915	0.7392	0.6927	2.2981	1.5416	1.3099	0.9926	1.2101	1.5649	0.9968	0.2535	1.0074	0.6803	1.3251	1.7611	1.978	0.6832	0.5876	1.3869	0.5694	0.9585	1.213	0.995	0.4131	1.729	1.2102	0.5621	0.7968	1.4055	1.1241	1.0032
1000	1-arachidonoylglycerophosphoethanolamine*	Lipid	Lysolipid	35186	LC/MS Neg	5731	500.3				HMDB11517	0.6977	1.0933	0.5325	1.0091	1.1368	1.8742	1.9398	1.4711	1.0101	1.1917	1.9183	1.7053	1.0102	1.5145	2.6094	2.4305	0.6624	0.726	0.5896	0.9909	1.1285	0.9485	1.4158	0.8077	0.7959	0.4505	0.3575	0.3832	0.7233	0.6506	0.344	1.2088	1.376	0.847	0.5113	1.0515	1.0264	1.0762
1040	1-arachidonoylglycerophosphoinositol*	Lipid	Lysolipid	34214	LC/MS Neg	5479	619.4					1.0779	0.6356	0.4057	1.0342	1.2434	1.2843	0.931	0.8301	0.5996	0.434	1.0563	0.9148	0.9203	1.002	1.481	1.3049	0.88	0.998	1.3143	0.9462	1.3545	0.5958	1.8716	1.1211	0.797	1.4216	0.5951	0.9907	1.6481	0.9847	0.6608	1.1768	1.3255	0.6798	1.1803	1.9165	1.3177	1.0153
1029	1-docosahexaenoylglycerophosphocholine*	Lipid	Lysolipid	33822	LC/MS Pos	5518	568.4					1.1825	2.3347	0.6432	0.905	1.6187	0.4762	4.181	1.6061	0.5314	0.3884	2.8182	1.8216	1.812	1	0.954	1.4181	0.7166	0.5086	1.192	1.1462	1.9138	1.4561	1.3142	0.5996	0.2912	1.1909	0.9112	0.9745	1.3986	1.0073	0.2883	1.412	0.974	0.5663	0.7096	1.3508	0.9927	1.3242
1027	1-docosapentaenoylglycerophosphocholine*	Lipid	Lysolipid	37231	LC/MS Pos	5584	570.4					2.1818	1.2153	0.626	1.3245	1.6385	0.1138	1.4844	1.9432	1.0605	0.1138	2.4651	2.4461	1.2166	0.3199	0.1138	2.4318	1.0011	0.1138	0.1138	0.6262	1.2374	1.1721	1.3114	1	0.7041	0.9124	0.2653	0.1138	0.7736	2.1692	0.1138	0.9684	0.1138	0.1138	0.1138	0.7015	0.7059	0.7639
1022	1-eicosadienoylglycerophosphocholine*	Lipid	Lysolipid	33871	LC/MS Pos	5696	548.3					1.4705	2.7617	1.2034	1.9152	0.9885	0.6045	2.6053	1.2637	0.8373	1	1.1731	0.9279	2.1906	0.3363	0.7354	1.4848	1.6541	0.2447	0.8125	1.0219	1.1359	2.2037	1.2787	1.0271	0.7673	1.516	0.4268	0.8815	0.8382	1.4053	0.4026	1.8195	0.846	0.3725	0.8153	1.035	1.0115	1.2579
1023	1-eicosatrienoylglycerophosphocholine*	Lipid	Lysolipid	33821	LC/MS Pos	5600	546.4					2.1466	3.2598	1.1624	1.8861	1.8174	0.4364	3.8886	2.9192	1.5926	0.9708	2.6031	1.6149	2.4183	0.8247	1.0292	1.866	1.3311	0.3105	0.7568	0.9429	2.0104	2.238	2.3594	0.9725	0.5356	1.0275	0.541	0.9215	0.6788	1.7867	0.3479	1.4376	0.9091	0.3121	0.4968	1.0599	0.767	0.8061
1014	1-heptadecanoylglycerophosphocholine	Lipid	Lysolipid	33957	LC/MS Pos	5750	510.4		50930-23-9;		HMDB12108	1.4274	3.5002	1.0792	2.0543	1.668	0.2618	5.4789	1.4456	0.9344	0.7802	3.3293	1.1939	2.1219	0.9769	0.9407	0.7924	1.9675	0.2372	1.3131	1.3834	2.9368	2.1056	2.261	0.8203	0.661	1.0355	1.0231	0.5579	0.604	0.75	0.4113	1.7514	1.2021	0.2372	0.7867	0.8802	0.9645	1.354
1019	1-linoleoylglycerophosphocholine	Lipid	Lysolipid	34419	LC/MS Pos	5574	520.4	11988421		C04100		1.0779	1.7943	1.4984	1.2302	1.0728	0.2294	2.2713	1.1057	0.9619	1.0363	1.7975	1.0166	1.1528	0.5205	1.2521	1.0545	1.285	0.2881	0.7085	1.0173	1.1256	1.9958	1.4829	1.0026	0.9297	0.9614	0.2852	0.5061	0.8488	0.9974	0.3262	2.2187	1.0642	0.6083	0.6461	1.1066	0.9261	1.0028
998	1-linoleoylglycerophosphoethanolamine*	Lipid	Lysolipid	32635	LC/MS Neg	5725	476.3				HMDB11507	1.269	2.3592	1.5434	3.8145	0.9321	2.0467	4.2316	1.0679	1.7341	2.9182	3.1717	1.1409	1.528	1.0237	3.2799	1.3493	1.4692	0.9763	0.5823	1.932	1.3606	3.4629	1.4101	1.3754	0.8897	0.2643	0.1866	0.1967	0.2293	0.4117	0.2006	4.5843	1.6781	0.3373	0.5099	1.0522	1.4001	0.8864
1806	1-methylxanthine	Xenobiotics	Xanthine metabolism	34389	LC/MS Pos	1974	167	80220	6136-37-4;			0.7541	1.342	0.4256	1.2094	2.1004	0.9571	1.6449	1.1843	0.9911	0.7141	1.3428	0.5921	1.8217	1.3925	1.0088	1.0164	0.8164	1.131	1.3535	1.0089	2.2802	0.5361	1.0137	0.5333	1.0367	1.1628	0.6237	0.2866	0.6572	0.2866	1.0931	0.2866	0.5473	0.2866	0.9912	0.2866	1.1448	0.2866
1007	1-myristoylglycerophosphocholine	Lipid	Lysolipid	35626	LC/MS Pos	5481	468.3	460604	20559-16-4;		HMDB10379	1.4131	2.0241	1.38	1.3692	1.0003	0.6883	3.1621	0.8394	0.642	1.5801	2.2281	1.206	2.4664	0.8692	1.413	1.7214	1.6	0.2972	0.8067	0.5301	1.2107	2.6838	6.0034	0.551	0.4936	1.1378	0.576	0.4018	0.5835	0.9997	0.4535	1.9934	1.232	0.2206	0.3181	0.8827	1.527	1.2065
1031	1-O-hexadecylglycerophosphocholine	Lipid	Lysolipid	34417	LC/MS Pos	5755	482.4	3983				1.0405	2.3946	1.1311	2.0556	1.2362	0.2521	3.3503	1.0918	0.6129	0.6291	2.0699	0.6629	1.1175	0.5727	0.6448	0.8201	1.3246	0.2527	1.0628	0.94	1.5035	2.8422	1.8645	0.785	1.0496	1.4081	0.6675	0.4616	0.5185	1.0593	0.3615	1.5308	1.0946	0.2472	0.9163	0.9372	1.2801	0.9595
1055	1-oleoylglycerol (1-monoolein)	Lipid	Monoacylglycerol	21184	GC/MS	2181.2	397.4	5283468	111-03-5;		HMDB11567	1.1227	1.2125	1.1484	0.6331	0.3162	1.6832	0.3162	0.7866	1.0295	0.3162	2.8562	1.3913	0.9705	0.5434	0.9248	1.2328	1.5956	0.3162	0.3665	0.3637	0.6843	0.8331	0.3162	1.0524	1.3991	0.5094	0.3162	2.6154	0.7101	0.3162	0.5409	0.3162	0.3162	0.3162	0.8957	1.3142	0.8751	1.2489
1017	1-oleoylglycerophosphocholine	Lipid	Lysolipid	33960	LC/MS Pos	5700	522.4	16081932	19420-56-5;			1.3405	2.5202	1.5741	1.2895	1.2627	0.2004	2.0936	0.98	0.9634	1.0723	1.8095	0.8872	1.2394	0.4359	0.765	0.9644	1.8275	0.2248	0.9277	0.9893	1.0356	1.6426	1.6504	0.9401	0.7904	1.2799	0.4848	0.6131	1.0107	1.2761	0.3595	1.8454	1.4182	0.5721	0.7719	1.2665	1.1894	1.3274
996	1-oleoylglycerophosphoethanolamine	Lipid	Lysolipid	35628	LC/MS Neg	5928	478.3	9547071	89576-29-4;		HMDB11506	1.5876	2.4199	1.3573	3.2349	1.3086	1.4662	2.6271	0.8704	1.8046	1.7415	1.5627	1.1818	1.1377	0.7467	2.1652	1.5225	1.876	1.035	0.4002	1.0804	0.8931	2.2158	1.0742	1.3162	0.7948	0.4325	0.2867	0.3853	0.4474	0.9196	0.225	2.1796	1.7673	0.4507	0.4786	0.9067	1.6712	2.0379
1012	1-palmitoleoylglycerophosphocholine*	Lipid	Lysolipid	33230	LC/MS Pos	5524	494.3					1.8053	1.5762	1.4184	0.9894	1.0106	0.2817	1.6731	0.6052	0.6398	1.5706	1.0803	0.8273	1.2469	0.5078	0.6872	1.8508	1.7109	0.1556	0.6753	0.7394	0.5424	1.5017	3.6777	0.8229	0.743	3.0557	0.4627	0.4843	1.2936	2.2088	0.5982	1.7146	2.6742	0.5391	0.5334	1.4263	2.6958	1.9242
992	1-palmitoleoylglycerophosphoethanolamine*	Lipid	Lysolipid	34565	LC/MS Neg	5661	450.4					1.8175	1	0.3723	1.4785	0.8877	1.5934	0.3723	0.3723	0.3723	5.1236	0.3723	0.6345	1.2593	0.5891	2.104	2.1101	0.862	0.4197	0.3723	0.3723	0.3723	0.7663	1.9787	0.9015	0.8882	0.3723	0.3723	0.8195	0.3723	1.3066	0.7149	0.3723	1.7765	0.3723	1.15	0.8254	1.5526	1.0282
1051	1-palmitoylglycerol (1-monopalmitin)	Lipid	Monoacylglycerol	21127	GC/MS	2119.5	371.3	14900	542-44-9;			1.0944	0.9785	0.8771	1.6071	0.953	1.4599	1.0705	1.5865	0.8653	2.2564	1.7809	1.36	1.1664	0.6372	0.9372	1.8884	1.6686	0.6511	0.9966	0.6408	0.7262	0.6034	0.8389	1.0062	0.9053	1.4564	0.8444	1.3528	0.6199	0.9938	0.455	1.1347	1.2804	0.7919	1.0034	1.0252	1.2252	0.933
1010	1-palmitoylglycerophosphocholine	Lipid	Lysolipid	33955	LC/MS Pos	5671	496.4	86554	17364-16-8;			1.1754	1.6731	1.3983	1.1361	1.0983	0.2639	1.7397	1.2602	0.9493	1.0241	1.8891	1.1201	1.0996	0.7127	0.6378	0.8513	1.188	0.3003	1.0287	0.8812	1.2935	1.5461	1.2894	0.7583	0.7881	0.9946	0.6143	0.7952	0.7749	1.0054	0.4154	1.2694	1.3263	0.4795	0.6712	0.7844	1.0399	1.1233
990	1-palmitoylglycerophosphoethanolamine	Lipid	Lysolipid	35631	LC/MS Neg	5940	452.3	9547069			HMDB11503	1.3075	1.8013	0.9813	1.6088	1.1465	2.4335	2.447	1.3106	1.4771	2.5164	2.4994	1.3275	1.2797	1.4425	2.1644	2.3788	0.9421	1.3529	0.6624	0.989	1.4087	0.6993	1.0705	0.6705	0.7394	0.4654	0.6562	0.5834	0.7139	0.7653	0.4342	1.0025	1.4283	0.8246	0.8822	0.5974	1.1187	1.3742
1032	1-palmitoylglycerophosphoinositol*	Lipid	Lysolipid	35305	LC/MS Neg	5573	571.3					1.1815	0.8985	0.6253	1.2591	1.1735	1.0989	0.3214	1.0684	1.0266	1.1363	0.8118	0.6625	0.8675	1.0466	0.3214	3.2835	1.4058	0.8384	1.4534	1.7347	0.8187	0.536	1.2695	2.1091	0.8575	1.2984	0.962	0.3214	1.4498	0.9734	0.3214	1.344	0.7272	0.5803	1.169	0.9248	0.8512	1.3517
1045	1-palmitoylplasmenylethanolamine*	Lipid	Lysolipid	39270	LC/MS Neg	6153	436.4					1.2532	1.2739	0.4124	1.2599	1.5234	0.9347	1.2252	1.6114	1.1358	1.2112	1.464	1.1441	0.6719	1.5888	1.0051	1.3596	1.2073	1.3426	1.0781	1.0486	1.5775	0.8573	0.7478	1.4733	0.7332	0.6807	0.6073	0.3108	0.5897	0.9415	0.7707	0.925	0.8366	0.3108	0.8298	1.1735	0.9514	0.8582
1053	1-stearoylglycerol (1-monostearin)	Lipid	Monoacylglycerol	21188	GC/MS	2186.6	399.4	24699	123-94-4;	D01947		2.5932	1.9586	0.9649	1.2712	1.5268	1.6513	3.2047	1.5348	1.022	3.1084	1.5883	0.8837	1.0444	0.8558	1.8763	2.1586	2.0998	0.51	1.2779	0.9039	0.5801	1.498	0.4054	0.9241	0.8753	1.0835	1.4705	1.4657	0.7199	0.8944	0.5389	0.8759	1.4866	0.8695	1.0108	0.8315	1.3849	0.978
1015	1-stearoylglycerophosphocholine	Lipid	Lysolipid	33961	LC/MS Pos	5844	524.4	497299	19420-57-6;			0.9959	4.9498	0.4733	1.3062	0.7077	0.6379	6.1731	2.6675	1.8332	0.9552	5.4509	1.4321	2.1193	0.3682	0.509	0.9499	1.3361	0.6989	2.1978	0.8946	3.305	1.2438	2.0686	0.594	1.5411	1.1499	0.4572	0.911	0.6399	1.6907	0.5824	1.1802	1.3593	0.2877	1.1805	0.9038	1.4239	0.7684
995	1-stearoylglycerophosphoethanolamine	Lipid	Lysolipid	34416	LC/MS Neg	6200	480.4	9547068	69747-55-3;		HMDB11130	1.8711	1.5515	0.8668	1.6157	0.7522	0.9768	1.2892	1.2909	1.7848	1.1332	1.6751	1.0302	1.5313	1.3927	1.5555	1.2068	0.8172	0.8432	0.8436	0.9491	1.6362	0.8496	1.4026	1.3015	0.4304	0.8442	1.0232	0.6051	0.8045	0.9461	0.6876	0.7413	1.3411	0.6601	1.3022	0.7779	0.9116	1.3633
1035	1-stearoylglycerophosphoinositol	Lipid	Lysolipid	19324	LC/MS Neg	5800	599.4		796963-93-4;			0.96	0.8287	0.4886	1.0952	0.9433	0.9307	0.6648	0.78	0.6589	1.1908	0.8586	0.5847	0.7988	1.0687	0.516	1.5596	1.2179	0.5694	2.783	1.3554	0.9309	0.7145	0.7728	1.1072	1.5122	1.0782	1.0785	1.0247	2.2262	0.9478	1.1638	0.9098	1.151	0.9573	0.9846	1.2343	1.1765	1.04
705	10-heptadecenoate (17:1n7)	Lipid	Long chain fatty acid	33971	LC/MS Neg	5558	267.3	5312435	29743-97-3;			0.9175	0.9536	0.8022	0.3757	0.1605	0.5782	0.1854	0.6474	1.0282	1.0546	0.469	0.3287	0.3984	1.2156	0.6409	0.6183	0.6895	0.4146	2.3161	2.02	0.2903	0.4534	0.2535	1.7908	2.1624	0.339	1.4086	1.4226	1.4585	1.1734	1.2239	0.4038	0.1817	3.0651	1.8023	1.8339	0.4268	2.0916
717	10-nonadecenoate (19:1n9)	Lipid	Long chain fatty acid	33972	LC/MS Neg	5775	295.4	5312513	73033-09-7;			0.8846	0.9856	0.7545	0.63	0.1971	0.5935	0.236	1.1274	1.2291	1.266	0.5955	0.4207	0.5003	1.1796	0.7102	0.4987	0.7351	0.4391	2.6914	2.7079	0.3556	0.4072	0.2811	1.6252	2.4903	0.505	1.559	1.7543	1.7013	1.0248	1.451	0.6029	0.2181	3.1542	1.5342	1.4334	0.631	2.3142
693	10-undecenoate (11:1n1)	Lipid	Medium chain fatty acid	32497	LC/MS Neg	5086	183.3		1333-28-4;			0.6231	0.8997	1.1095	0.5839	0.437	0.9547	1.6229	2.7284	0.7601	1.3805	1.554	0.6251	0.6104	1.3575	1.3034	1.5327	3.1605	0.7438	1.9901	1.7772	1.4224	0.4851	0.4147	1.4672	1.2149	0.9025	1.9998	2.6796	0.3354	0.7582	0.7605	0.4585	0.8321	2.2763	0.7753	1.2272	0.8788	1.1473
873	12-HETE	Lipid	Eicosanoid	37536	LC/MS Neg	5295	319.3		73837-14-6;		HMDB06111	2.3672	1.0693	0.6123	0.1908	0.4252	0.3167	0.7844	0.2732	2.5734	0.5219	0.544	0.1426	1.95	1.7551	0.1426	0.1426	0.4772	0.1426	21.0662	0.1426	0.231	0.5337	0.5502	0.365	0.7761	5.8064	0.531	0.9201	1.363	1	2.7279	0.1426	0.4821	0.1426	2.7921	1	3.4499	0.5168
819	15-methylpalmitate (isobar with 2-methylpalmitate)	Lipid	Fatty acid, branched	38768	LC/MS Neg	5698	269.4					0.923	0.8458	0.8465	1.1327	0.6116	1.2491	0.4515	1.2792	1.0204	1.2464	0.7596	0.7915	0.9516	1.0353	0.8086	0.8187	0.9796	0.6579	1.858	1.8421	0.8845	0.9647	0.6324	1.5082	1.594	0.7199	1.3237	1.5974	1.0977	0.9599	1.1088	0.7837	0.6101	2.0877	1.2999	1.3401	0.7472	1.6633
821	17-methylstearate	Lipid	Fatty acid, branched	38296	LC/MS Neg	5987	297.4	3083779	2724-59-6;			0.4749	1.372	0.7406	0.9419	0.3514	0.6479	0.2333	1.814	1.2651	1.4358	0.3315	0.6163	0.7176	1.6317	0.5297	0.2333	1.0005	0.7282	2.327	1.4806	0.5595	1	0.3701	1.2665	1.8589	0.679	2.1918	2.0789	0.9995	1.4307	0.9456	0.7003	0.7409	3.1362	1.3396	1.5192	0.5403	2.2549
610	2,3-butanediol	Carbohydrate	Glycolysis, gluconeogenesis, pyruvate metabolism	35691	GC/MS	1075	116.9		24347-58-8;	C03044	HMDB03156	0.4493	0.2874	0.516	0.8145	0.2874	0.2874	0.6807	0.2957	6.546	42.7012	0.51	0.5461	0.2874	0.2874	0.6686	0.982	1.0118	0.3598	0.5372	1.3347	0.4873	0.2874	0.7665	0.5325	0.2874	3.0339	10.7973	1.4481	0.5655	1.011	0.9869	2.6071	3.9296	0.989	0.4582	0.6886	7.3223	7.5792
278	2-aminobutyrate	Amino acid	Butanoate metabolism	32348	LC/MS Pos	758	104.1	4396916971251	1492-24-6;	C02261	HMDB00650	0.5609	0.9913	0.5447	0.9301	1.0129	0.564	0.9588	1.1049	0.8981	0.7587	0.6494	0.9755	0.9619	1.309	1.0087	0.7331	0.7033	0.6037	0.7547	0.6057	1.4528	0.4965	0.4964	0.9871	1.401	1.0966	1.0851	1.8438	1.1489	1.4864	1.0896	0.8921	1.3099	2.086	1.1759	1.0737	1.1452	1.7017
1026	2-arachidonoylglycerophosphocholine*	Lipid	Lysolipid	35256	LC/MS Pos	5524	544.3					1.1078	1.2492	0.7221	0.8266	1.1946	0.1279	1.4431	1.0874	0.4807	0.362	1.5691	1.3555	1.3386	0.2928	0.3559	1.1744	0.7278	0.1174	1.1727	0.4025	1.0005	2.1058	1.3217	0.7354	0.3581	1.2266	0.8383	1.543	1.0767	1.1085	0.7684	1.0119	0.9995	0.376	0.9412	2.3016	1.2136	0.9541
1001	2-arachidonoylglycerophosphoethanolamine*	Lipid	Lysolipid	32815	LC/MS Neg	5674	500.3					1.0018	1.322	0.6561	1.4666	0.7925	1.3827	1.4482	1.4949	0.9538	0.8751	1.6439	1.6977	0.9144	1.3884	2.1238	2.4789	0.5106	0.7811	0.773	1.1461	1.1137	0.9807	1.1913	0.9982	0.5106	0.5281	0.5106	0.5106	0.8986	0.5106	0.5106	1.0193	1.1104	0.5106	0.5221	0.91	1.5279	1.6048
1030	2-docosahexaenoylglycerophosphocholine*	Lipid	Lysolipid	35883	LC/MS Pos	5507	568.3					1.2486	0.8194	1.0299	0.9779	1.2091	0.5429	1.3274	1.1838	0.2739	0.1924	1.212	1.3936	1.4931	0.1924	1.447	0.8035	0.8037	0.7318	0.9701	0.904	1.4773	1.177	0.8877	0.4229	0.1924	1.1316	0.8879	1.0824	1.7767	0.7894	0.1924	1.2109	1.0346	0.6267	0.5166	1.6318	0.8495	1.1131
1004	2-docosahexaenoylglycerophosphoethanolamine*	Lipid	Lysolipid	34258	LC/MS Pos	5512	526.2					0.5363	0.5116	0.6521	1.2484	0.5306	0.1762	1.3099	0.1762	0.6501	0.3788	1.561	0.9483	0.6365	0.1762	0.318	0.1762	1.297	0.3123	1.1173	1.5036	0.7554	1.4045	0.1762	0.6827	0.9442	1.6466	1.0503	1.5375	0.1762	1.2358	0.8156	0.9522	0.1762	0.1762	0.6981	1.4552	1.1927	1.2159
1028	2-docosapentaenoylglycerophosphocholine*	Lipid	Lysolipid	37366	LC/MS Pos	5532	570.3					1.7901	2.1646	0.7289	0.8539	1.3362	0.2545	2.3676	1.7642	1.1616	1	1.4814	1.1286	2.1029	0.6945	0.2545	1.4662	1.2069	0.3446	0.6641	0.9008	2.3603	1.54	2.0815	1.0125	0.943	1.2698	0.6749	0.9254	1.1626	0.9875	1.0093	1.0099	0.7556	0.9165	0.6595	0.9693	0.6815	0.7671
1471	2-ethylhexanoate	Xenobiotics	Chemical	1554	GC/MS	1210.5	201.2	8697	149-57-5;			1.2987	1.3052	0.5008	1.7502	1.4914	1.1562	0.975	1.671	0.368	1.28	2.1035	1.152	1.2518	0.862	0.494	2.1692	1.9061	0.8779	1.3585	0.5782	0.6354	1.2359	1.496	1.3729	1.6328	0.7313	1.3507	1.0616	1.1688	1.0874	0.5148	0.7616	0.7986	0.7363	1.2384	0.6854	0.6642	0.6385
211	2-hydroxy-3-methylvalerate	Amino acid	Valine, leucine and isoleucine metabolism	36746	LC/MS Neg	1787	131.1	164623	488-15-3;		HMDB00317	0.2084	0.6149	0.5364	0.58	0.3149	0.7021	0.2906	0.5517	1.5586	1.1851	0.5029	0.2675	0.2933	0.3346	0.5191	0.338	0.3957	0.3427	0.2865	0.2084	0.3682	0.8149	0.4985	1	1.5029	3.6562	7.7083	3.0617	0.9962	6.2152	1.7663	2.1448	1.615	2.7735	1.9139	0.7901	2.4928	1.6466
1543	2-hydroxyacetaminophen sulfate*	Xenobiotics	Drug	33173	LC/MS Neg	1703	246.1					0.1671	0.1671	0.1671	0.1671	0.1671	0.1671	0.1671	0.1671	0.1671	0.1671	4.1026	0.1671	0.1671	0.1671	12.6961	0.1671	0.1671	0.1671	0.1671	0.1671	1.8329	0.1671	0.1671	0.1671	0.1671	0.1671	1	0.1671	0.1671	0.1671	0.1671	0.1671	0.1671	0.1671	0.1671	0.1671	0.1671	0.1671
241	2-hydroxybutyrate (AHB)	Amino acid	Cysteine, methionine, SAM, taurine metabolism	21044	GC/MS	1169.4	130.9	440864	3347-90-8;	C05984	HMDB00008	0.3476	0.6159	0.3995	0.5837	0.2866	0.3047	1.0035	1.5095	1.0291	1.525	0.4632	0.5084	0.5945	1.4041	0.636	0.4369	0.6641	0.6154	1.3651	0.6681	0.5407	0.4329	0.2259	0.6552	1.042	1.45	5.0904	3.5352	2.5445	1.4661	1.2372	0.5965	1.0204	3.2362	2.0979	0.6183	1.4737	3.7388
786	2-hydroxyglutarate	Lipid	Fatty acid, dicarboxylate	37253	GC/MS	1576	247	43	40951-21-1;	C02630	HMDB00606	0.9662	0.4794	0.4665	0.7057	0.8758	1.0036	1.6891	0.8121	0.9036	2.6235	0.8495	2.2728	0.711	0.816	0.8106	1.1711	0.7529	0.9607	0.9964	1.1616	0.8748	0.6475	0.6787	0.5504	0.9757	2.9493	2.755	1.6749	1.421	1.3818	0.6444	1.9963	1.2891	1.3967	1.8838	0.7735	2.2399	1.0243
1398	2-hydroxyhippurate (salicylurate)	Xenobiotics	Benzoate metabolism	18281	LC/MS Neg	2252	194.1	10253	487-54-7;	C07588	HMDB00840	0.303	0.2103	0.2103	0.2169	0.2573	1	0.2278	54.3399	1.5423	11.6058	0.2103	88.953	2.9016	0.2103	0.2103	76.8204	0.4026	0.3941	0.2103	0.2103	1.6286	0.2458	9.679	0.2103	1	0.2103	1.2651	0.2103	0.2103	0.2103	0.2103	0.2103	0.2103	0.2103	0.2103	0.2103	0.2103	0.2103
1434.1	2-hydroxyisobutyrate	Xenobiotics	Chemical	22030	GC/MS	1107.5	130.9	11671	594-61-6;		HMDB00729	0.3621	0.31	1.2019	0.9197	1	1.0609	0.9066	1.345	1.1366	2.0779	0.3298	2.6133	1.0303	0.8098	0.8839	0.939	0.4334	0.6758	0.7622	0.6191	0.5676	0.2046	0.5668	0.3049	0.9801	1.1472	1.972	0.8225	0.8192	0.923	3.8537	1.5616	3.0454	2.4806	1.8552	0.9391	2.3896	2.4932
764	2-hydroxyoctanoate	Lipid	Fatty acid, monohydroxy	22036	LC/MS Neg	3781	159.2	94180	617-73-2;		HMDB02264	0.4701	0.7213	0.9962	1.5138	0.5289	1.2709	1.265	0.6978	0.9944	0.4701	1.1957	0.8935	0.7753	0.6817	0.6501	0.4701	1.7025	1.4568	0.4701	0.4701	1.0436	0.8923	1.4252	0.9433	1.3022	1.0056	1.7219	0.5729	0.4701	0.5653	0.9292	1.0063	1.2777	0.6083	0.5957	0.8824	1.4736	0.4701
776	2-hydroxypalmitate	Lipid	Fatty acid, monohydroxy	35675	LC/MS Neg	5508	271.3	92836	764-67-0;			0.8234	1.423	0.8308	1.0957	0.521	0.7348	0.9664	0.9618	1.0382	1.8681	0.9782	0.5158	0.6505	0.8505	0.5829	1.2168	1.1983	0.6969	1.9091	1.1503	0.5917	0.626	1.1271	0.8624	1.0941	0.7203	0.866	1.5002	0.8575	1.0715	1.5492	1.8602	1.1281	1.4059	0.8669	1.0305	1.0541	1.3043
774	2-hydroxystearate	Lipid	Fatty acid, monohydroxy	17945	LC/MS Neg	5705	299.4	69417	629-22-1;	C03045		0.9741	1.3186	0.684	0.8957	0.9672	1.4603	0.867	1.3935	0.853	1.3813	1.0498	0.7448	1.087	0.9916	0.9385	1.6512	1.2859	0.806	2.1332	1.2856	1.0413	0.8044	1.2652	0.8122	1.1956	0.7028	0.9026	1.3306	1.0149	1.1574	0.9966	1.3527	1.2901	1.6362	1.0259	0.7633	1.0432	0.9851
1020	2-linoleoylglycerophosphocholine*	Lipid	Lysolipid	35257	LC/MS Pos	5544	520.4					1.3284	2.1299	1.5	1.7806	1.2847	0.1489	4.1776	0.9725	1.0549	0.8289	1.88	0.9074	1.3495	0.3187	0.578	1.2015	1.7249	0.2002	0.9729	1.0647	1.1995	3.4237	1.4571	1.0275	0.7095	0.8514	0.6805	0.8406	0.7505	0.8265	0.5193	2.5717	0.9649	0.3424	1.176	1.5036	1.0603	1.2179
999	2-linoleoylglycerophosphoethanolamine*	Lipid	Lysolipid	36593	LC/MS Neg	5650	476.4					0.8181	1.6248	1.1542	2.7368	0.6437	0.9392	2.5793	2.2422	1.6484	1.5492	1.8558	1	1.5974	1	1.9376	1.4448	1.9376	0.5549	0.3118	1.3122	1.2486	2.5508	1.0146	1.3674	1.0634	0.3849	0.3118	0.7341	0.3118	0.6562	0.3118	2.5259	2.0741	0.9876	0.7407	0.9196	0.7768	0.5784
1544	2-methoxyacetaminophen sulfate*	Xenobiotics	Drug	33178	LC/MS Neg	1977	260.1					0.1858	0.1858	0.1858	0.1858	0.1858	0.1858	0.1858	0.1858	0.1858	0.1858	0.6964	0.1858	0.1858	0.1858	2.6263	0.1858	0.1858	0.1858	0.1858	0.1858	1	0.1858	0.1858	0.1858	0.1858	0.1858	1.668	0.1858	0.1858	0.1858	0.1858	0.1858	0.1858	0.1858	0.1858	0.1858	0.1858	0.1858
212	2-methylbutyrylcarnitine (C5)	Amino acid	Valine, leucine and isoleucine metabolism	35431	LC/MS Pos	2439	246.1	6426901	31023-25-3;		HMDB00378	0.1981	0.943	0.9695	0.9533	1.2525	0.8424	1.2659	2.0379	1.3222	0.8876	1.0068	2.4567	1.5656	0.919	0.8415	0.5096	0.5697	0.9932	0.6558	0.5092	1.2578	0.8103	1.2278	0.3839	1.0549	0.7585	1.4122	1.4541	0.4093	0.8866	2.0281	2.2253	0.7524	4.5304	0.7471	0.6169	0.9249	6.4418
1008	2-myristoylglycerophosphocholine*	Lipid	Lysolipid	35681	LC/MS Pos	5450	468.3					1.3878	1.7427	0.9641	1.2991	0.5307	0.64	1.0359	1.3405	0.6632	0.836	1.4427	0.8676	1	0.307	0.7046	1.2228	1.0348	0.2682	0.2682	0.2682	0.679	1.2949	2.0338	0.2682	0.4981	0.9713	1.3799	0.2682	0.2682	1	0.2682	0.2682	1.9764	0.2682	0.8899	0.2682	1.794	1.4531
1018	2-oleoylglycerophosphocholine*	Lipid	Lysolipid	35254	LC/MS Pos	5640	522.4					1.5312	1.5481	1.6606	1.9076	1.0172	0.0764	1.3822	0.7963	0.954	0.6852	1.0333	1.1179	0.9323	0.1915	0.2504	0.7982	2.0376	0.0992	0.6877	0.7613	1.0514	1.5768	0.9667	0.7992	0.7786	1.9553	0.5875	1.0843	1.0752	2.014	0.4747	1.4036	2.4713	0.5037	0.8498	1.1788	2.2333	2.057
997	2-oleoylglycerophosphoethanolamine*	Lipid	Lysolipid	35687	LC/MS Neg	5848	478.3					1.1999	1.2791	1.2909	2.3575	1.0266	0.8489	2.4803	1.4082	1	1.2239	0.8587	0.8336	0.8877	0.659	1.3843	1.8562	0.8711	1.1314	0.4515	0.9639	0.9935	1.6448	0.7149	1.436	0.9519	0.7841	0.4515	0.4515	0.4515	0.4515	0.4515	1.8875	1.7072	0.4515	0.4623	0.773	1.6998	1.3648
1013	2-palmitoleoylglycerophosphocholine*	Lipid	Lysolipid	35819	LC/MS Pos	5482	494.3					2.493	0.6886	1.348	1.2544	1.129	0.1474	1.2303	0.7135	0.7088	1.2685	0.4879	0.7379	0.9142	0.1474	0.3548	2.4869	1.5268	0.1474	0.6341	0.9031	0.6113	1	3.3779	0.7793	0.7837	0.1474	0.5126	0.6778	1.2552	3.3151	0.5565	1.4503	3.2509	0.7009	1.0044	1.9914	3.9918	2.0472
1011	2-palmitoylglycerophosphocholine*	Lipid	Lysolipid	35253	LC/MS Pos	5604	496.3					1.2161	2.6831	1.1495	1.5341	0.9835	0.2359	3.6796	1.0165	0.9356	1.2307	2.3092	1.1183	1.2514	0.7259	0.9173	0.9641	1.415	0.205	1.1012	0.7342	1.7604	2.0717	2.5728	0.7347	0.6406	1.2521	0.4574	0.6419	0.9269	1.1355	0.4864	1.3024	1.3763	0.3799	0.7988	0.8166	1.3296	1.0434
1016	2-stearoylglycerophosphocholine*	Lipid	Lysolipid	35255	LC/MS Pos	5780	524.4	10208382				1.234	3.5778	1.0362	2.1719	0.9385	0.3311	5.1533	1.2281	1.1257	0.9174	3.348	1.0922	2.0175	0.7136	0.6888	0.9891	1.5813	0.3093	1.6421	0.9622	2.0422	2.2062	3.28	0.7487	0.6908	1.0916	0.3884	0.6203	0.7313	1.0109	0.4102	1.4073	1.0649	0.2885	0.9638	1.3096	1.2543	0.7194
1174	21-hydroxypregnenolone disulfate	Lipid	Sterol/Steroid	37173	LC/MS Neg	3931	245.3	134595		C05485	HMDB04026	1	0.9816	1.1027	0.5709	2.0768	1.3815	1.1524	1.0012	0.7329	0.692	0.6889	0.57	1.1903	0.8379	0.4661	0.4661	0.4661	0.7068	0.9153	0.682	1.1291	0.5627	1.6803	0.4661	0.6264	0.5409	8.4595	1.0551	1.9807	0.9738	1.0184	0.6664	1.0664	4.5021	0.4661	0.8377	0.4661	2.0231
138	3-(3-hydroxyphenyl)propionate	Amino acid	Phenylalanine & tyrosine metabolism	35635	LC/MS Neg	2000	165.1	91	621-54-5;	C11457	HMDB00375	0.3292	0.3292	0.3292	0.3292	0.3292	2.6385	2.6092	1.3285	0.3292	0.9791	0.3292	0.3782	2.0749	0.9591	0.6296	0.3292	0.6715	0.3292	0.3292	0.3292	5.5938	1.0209	0.3292	0.3292	0.3292	0.3292	0.3292	0.3292	0.3292	0.3292	0.3292	0.3292	0.3292	0.3292	0.3292	0.3292	0.3292	0.3292
107	3-(4-hydroxyphenyl)lactate	Amino acid	Phenylalanine & tyrosine metabolism	32197	LC/MS Neg	1395	181.1	9378	6482-98-0;	C03672	HMDB00755	0.3939	0.8026	1.302	0.9846	0.361	0.4736	0.3434	0.8106	0.7085	0.7685	0.7167	0.9305	0.2755	0.3094	0.3943	0.4069	1.6703	0.8422	0.5489	1.0279	0.2668	1.0497	0.4982	1.288	1.3402	1.2592	2.6408	1.41	0.4329	0.8794	1.8397	2.9986	1.2012	4.522	0.9243	0.9503	1.6077	1.7929
1545	3-(cystein-S-yl)acetaminophen*	Xenobiotics	Drug	34365	LC/MS Pos	1960	271.2	5233914				0.3115	0.3115	0.3115	0.3115	0.3115	0.3115	0.3115	0.3115	0.3115	0.3115	0.3115	0.3115	0.3115	0.3115	1.6885	0.3115	0.3115	0.3115	0.3115	0.3115	1	0.3115	0.3115	0.3115	0.3115	0.3115	0.3115	0.3115	0.3115	0.3115	0.3115	0.3115	0.3115	0.3115	0.3115	0.3115	0.3115	0.3115
801	3-carboxy-4-methyl-5-propyl-2-furanpropanoate (CMPF)	Lipid	Fatty acid, dicarboxylate	31787	LC/MS Neg	2815	239.1	123979	86879-39-2;			0.2044	1.8515	0.198	1	3.0677	1.7157	8.2819	2.1936	0.7846	0.2173	0.507	0.5553	3.2925	1.2205	0.5988	0.8739	0.4077	26.9152	0.2438	4.1503	15.5249	0.0991	0.1981	0.1834	0.9504	0.0991	5.4937	2.7797	0.2109	0.2795	2.0175	1	2.0124	4.7785	0.0991	0.0991	0.4585	2.4231
900	3-dehydrocarnitine*	Lipid	Carnitine metabolism	32654	LC/MS Pos	1020	160.2	6991982	10457-99-5;			0.63	1.1387	1.8502	1.7307	1.022	3.2179	0.8241	1.2264	0.978	0.972	0.4439	1.3584	1.2171	0.7313	1.028	0.3058	1.3231	0.8782	0.9537	0.718	0.5882	0.5853	0.5071	0.5918	0.7537	0.8327	1.5401	2.4911	0.435	0.6951	1.229	1.7897	1.0321	1.1837	1.3415	0.9471	1.0666	3.2572
205	3-hydroxy-2-ethylpropionate	Amino acid	Valine, leucine and isoleucine metabolism	32397	GC/MS	1269	247.1	188979			HMDB00396	0.5509	0.7234	0.8062	0.9131	1	0.6718	0.2784	2.0044	1.4183	0.2784	0.925	0.9696	1.3242	0.3655	0.4184	0.5452	1.0291	0.2784	0.6713	0.8795	0.9624	0.7515	0.4153	0.2784	0.5126	0.7036	2.869	1.6145	0.4924	0.8384	1.2437	1.075	1.3573	2.0647	0.5714	1.3193	1.6553	2.2513
984	3-hydroxybutyrate (BHBA)	Lipid	Ketone bodies	542	GC/MS	1203.5	116.9	441	625-72-9;	C01089	HMDB00357	0.2387	0.9099	1.1095	0.2762	0.0485	0.3412	0.4627	0.5616	1.1306	0.7757	0.556	0.2897	0.2402	3.4711	1.3768	0.1238	0.1817	0.3546	2.7034	4.3258	0.4382	0.2498	0.1806	0.9132	4.5759	0.712	10.4476	8.574	18.1958	0.7058	0.4803	0.3766	0.6042	2.6808	4.8092	1.5762	1.1112	1.0868
768	3-hydroxydecanoate	Lipid	Fatty acid, monohydroxy	22053	LC/MS Neg	4681	187.2	26612	5561-87-5;		HMDB02203	1.3836	1.2491	0.8286	0.6481	0.283	0.6614	0.6537	0.9597	2.4329	0.9033	0.6963	0.4418	0.3153	0.6857	1.0547	0.283	0.502	0.4871	1.7218	1.5431	0.3487	0.478	0.6445	0.8184	1.7032	0.5975	2.5995	1.8034	0.8931	0.442	1.1779	0.7164	1.0458	1.3582	2.4999	1.5163	1.3437	0.6815
1399	3-hydroxyhippurate	Xenobiotics	Benzoate metabolism	39600	LC/MS Neg	1670	194.1	450268			HMDB06116	0.2492	0.2492	0.549	0.2492	0.8946	7.0881	2.896	2.0656	0.2751	1.0584	0.2492	0.9205	8.9211	2.6937	1	0.2492	0.2492	0.729	0.2492	0.2492	5.6231	0.8655	0.71	0.2492	0.2492	0.2492	0.2492	0.2492	0.2492	0.2492	0.2492	0.2492	0.2492	0.2492	0.2492	0.2492	0.2492	0.2492
202	3-hydroxyisobutyrate	Amino acid	Valine, leucine and isoleucine metabolism	1549	GC/MS	1205	177.11	11966314	2068-83-9;	C06001	HMDB00336	0.3421	0.9323	0.7729	1.0185	0.4086	0.6303	0.8945	1.0824	0.9661	0.6762	0.6475	0.8927	0.7919	0.8243	0.7612	0.5089	0.4601	0.6398	0.674	1.0175	0.6065	0.9393	0.2283	0.4991	0.9825	1.5909	4.1398	2.3985	1.221	0.8258	2.2676	1.3495	2.1419	2.2364	1.0607	1.4468	1.5228	2.712
765	3-hydroxyoctanoate	Lipid	Fatty acid, monohydroxy	22001	LC/MS Neg	3463	159.2	26613	88930-08-9;		HMDB01954	0.899	0.8383	0.8351	0.8018	0.3102	0.6519	1.1126	0.7967	1.6861	0.5275	0.7392	0.6117	0.3102	0.5718	1.4061	0.3102	0.589	0.4975	1.2231	1.2755	0.4159	1.0453	0.7683	1.0904	1.3605	0.8345	1.7288	1.3519	2.3521	0.3931	1.0183	0.9646	0.9096	2.3647	2.0728	1.2719	1.7221	0.5951
761	3-hydroxypropanoate	Lipid	Fatty acid, monohydroxy	42103	GC/MS	1187.1	177.1	5459847	503-66-2;	C01013	HMDB00700	0.9443	0.6163	0.1942	0.8428	0.8578	2.2582	0.8593	0.501	1.2903	0.9528	1.3723	0.7894	0.9766	0.1942	0.6887	1.0312	1.0872	0.7855	0.7871	0.7532	0.5239	1.301	0.6556	0.9804	1.334	0.796	1.4833	2.7968	0.6195	0.877	1	0.9341	1.6222	1.0437	1.2383	1.0006	19.7171	0.8988
179	3-indoxyl sulfate	Amino acid	Tryptophan metabolism	27672	LC/MS Neg	2258	212	10258	2642-37-7;		HMDB00682	0.2809	0.983	0.3365	2.0929	4.7827	1.7051	1.6278	8.7532	2.0217	0.3316	0.9563	7.3873	11.3004	1.017	3.2919	2.6643	3.2284	1.2049	0.1823	1	3.4652	1.2118	1.222	2.4598	2.2117	0.2254	0.4567	0.9058	0.0333	0.1599	1.1458	0.4456	0.5227	0.3571	0.0333	0.0502	0.1129	0.099
129	3-methoxytyrosine	Amino acid	Phenylalanine & tyrosine metabolism	12017	LC/MS Pos	1765	212.1	9307	300-48-1;		HMDB01434	1.1682	1.0002	1.1159	1.473	0.688	0.6056	0.9381	0.5727	0.5452	0.8389	1.2133	1.6507	0.8837	0.4519	0.7289	1.0088	1.0198	0.6494	1.0407	1.3213	0.8345	1	0.4518	0.673	2.0912	0.6987	1.2105	0.8404	1.3357	0.6804	0.9666	1.9133	1.0174	1.2999	0.5612	1.1217	0.9912	0.4557
182	3-methyl-2-oxobutyrate	Amino acid	Valine, leucine and isoleucine metabolism	21047	LC/MS Neg	1489	115.1	49	3715-29-5;	C00141	HMDB00019	1.1548	0.9372	0.442	0.7282	0.7464	1.074	1.1693	1.7571	1.2743	1.2233	0.6928	0.5398	0.9792	1.1887	1.0009	0.6805	0.9219	0.9991	0.9982	1.223	0.9768	0.9354	1.0052	0.9953	1.2758	1.3028	1.4591	1.4271	0.8085	1.2424	0.9712	0.7131	0.7847	1.0047	1.017	0.4246	1.3699	1.0559
183	3-methyl-2-oxovalerate	Amino acid	Valine, leucine and isoleucine metabolism	15676	LC/MS Neg	2106	129.2	47	51829-07-3;	C00671	HMDB03736	0.8305	1.2648	0.7373	1.0552	1.0833	1.3979	1.9041	2.2587	1.8028	1.2741	0.8489	0.8052	1.7369	2.0737	1.7725	0.5977	0.8027	1.5943	0.9108	1.0282	1.7329	1.7357	1.1995	0.9111	1.2464	0.6955	1.5481	1.5532	1.3191	0.9262	0.7854	0.9539	0.9718	1.0821	0.9219	0.7531	1.9935	0.8045
218	3-methylglutarylcarnitine (C6)	Amino acid	Valine, leucine and isoleucine metabolism	37060	LC/MS Pos	1900	290.1	128145			HMDB00552	0.2068	1	0.2068	0.2068	0.8608	0.2068	0.5411	1.5052	2.2204	0.2068	0.2068	4.8896	0.2068	0.2068	1.0784	0.2068	0.2068	1.8206	0.2068	0.7293	0.5034	0.2068	0.2068	0.2068	1.5045	0.2068	1.1022	0.5704	0.6252	0.74	1.1319	1.243	0.905	4.2128	0.3174	0.4656	0.7158	2.6977
1807	3-methylxanthine	Xenobiotics	Xanthine metabolism	32445	LC/MS Pos	1866	167.1	70639	1076-22-8 ;	C16357	HMDB01886	0.6375	0.4214	0.661	2.8798	1.0033	0.6866	1.2851	1.0471	1.4982	0.157	0.488	0.4881	1.0377	0.157	2.1241	0.157	0.157	0.157	1.032	1.5916	0.6488	0.157	1.5517	0.4008	1.3823	0.157	1.3356	0.157	0.157	0.5093	0.157	0.2939	0.157	0.157	1.083	0.157	1.1392	0.157
140	3-phenylpropionate (hydrocinnamate)	Amino acid	Phenylalanine & tyrosine metabolism	15749	LC/MS Neg	2830	149.1		501-52-0;	C05629	HMDB00764	1	3.5318	0.2367	0.2367	0.331	0.2367	1.6001	5.2561	0.2367	0.2367	1.7538	0.2367	0.2367	0.2367	0.3394	0.2367	0.2367	1.5443	0.266	2.7805	0.2367	0.6894	1.3106	1.7408	0.2367	0.2367	0.4746	0.2367	0.2367	0.2367	1.9298	0.3463	0.2367	0.2367	0.2367	0.2367	0.2367	0.2367
29	3-ureidopropionate	Amino acid	Alanine and aspartate metabolism	3155	LC/MS Pos	1062	133.1	111	462-88-4;	C02642	HMDB00026	0.2765	0.2765	0.5155	0.5983	0.2765	0.2765	0.2765	0.3937	0.2765	0.5571	0.2765	0.2765	0.2765	0.2765	0.2765	0.2765	0.5474	0.2765	0.9085	0.2765	0.2765	0.3134	0.2765	0.3627	1.0079	1.261	0.2765	1	2.5206	0.8821	1.6147	2.0579	0.912	3.8897	1.2252	0.9781	1.8052	0.9849
291	4-acetamidobutanoate	Amino acid	Guanidino and acetamido metabolism	1558	LC/MS Pos	1724	146.1	18189	3025-96-5;	C02946	HMDB03681	1.3657	0.8172	1	0.8058	0.9337	0.8293	0.8263	0.9146	0.5776	0.9606	0.8611	1.5979	0.5921	0.5787	0.4311	0.4459	0.8057	0.7404	1.308	0.4311	0.4311	0.7879	0.8605	0.771	1.2807	1.3712	0.4311	0.6251	0.8005	1.0663	2.0197	1.6907	0.8433	2.9721	1.3437	1.8545	2.4706	2.5521
1541	4-acetamidophenol	Xenobiotics	Drug	12032	LC/MS Pos	2238	152.1	1983	103-90-2;	C06804	HMDB01859	0.1986	0.1986	0.1986	0.1986	0.1986	0.1986	0.1986	0.1986	0.1986	0.1986	0.9456	0.1986	0.1986	0.1986	3.9333	0.2172	0.1986	0.1986	0.1986	0.1986	1.7828	0.1986	0.1986	0.1986	0.1986	0.1986	1.1029	0.1986	0.1986	0.1986	0.1986	0.1986	0.1986	0.1986	0.1986	0.1986	0.1986	0.1986
1538	4-acetaminophen sulfate	Xenobiotics	Drug	37475	LC/MS Neg	1779	230.1	83939	10066-90-7;32113-41-0;	C06804	HMDB01859	0.0134	0.0134	0.0134	0.0134	0.0134	0.0134	0.0134	0.0134	0.0134	0.0134	1.3239	0.0134	0.0134	0.0134	8.7707	1	0.0134	0.0134	0.0134	0.0134	11.6378	0.0134	0.0134	0.0134	0.0134	0.0134	2.0238	0.0134	0.0134	0.1138	0.0475	0.0134	0.0134	0.0134	0.0134	0.0295	0.0134	0.0134
1160	4-androsten-3beta,17beta-diol disulfate 1*	Lipid	Sterol/Steroid	37202	LC/MS Neg	3735	224.3				HMDB03818	2.1467	0.3855	0.6644	0.1204	6.2601	1.7961	0.651	1.1394	0.8064	0.5106	1.0819	0.8872	1.1128	3.2177	0.1839	1.3075	0.0955	2.0578	0.2119	0.2252	0.509	0.6559	11.1004	0.2351	0.6544	1.4222	3.4465	3.3963	0.5179	1.2623	2.8165	0.9181	4.951	3.842	0.1691	0.2617	3.2032	7.3131
1161	4-androsten-3beta,17beta-diol disulfate 2*	Lipid	Sterol/Steroid	37203	LC/MS Neg	4073	224.3				HMDB03818	1.4682	0.8593	1.6171	0.4373	2.0256	1.3236	1.0879	1.5993	1.6503	0.2706	1.4712	1.0017	1.1972	1.716	0.0651	1.2884	0.3928	1.2384	0.7578	0.6523	0.7223	0.9121	1.9718	0.6019	0.8978	0.9983	2.6518	0.8936	0.6732	0.9755	1.2995	0.5396	3.9122	2.8694	0.3085	0.7633	1.0767	4.0944
1422	4-ethylphenylsulfate	Xenobiotics	Benzoate metabolism	36099	LC/MS Neg	3570	201.1			C13637		0.3531	0.4131	1.5079	0.3531	3.1044	1.457	1.6332	1.0496	1.2803	0.3531	1.0681	1.2105	0.8761	2.785	1.5427	0.4623	0.3531	0.4289	0.3531	0.3531	1.075	0.8578	1.3708	0.4259	0.3531	0.3531	0.5642	0.3531	0.3531	0.3531	0.3531	1	1.0614	0.3531	0.3531	0.3531	1.0752	0.9504
124	4-hydroxyphenylacetate	Amino acid	Phenylalanine & tyrosine metabolism	541	GC/MS	1630.6	179	4693933	156-38-7;	C00642	HMDB00020	0.3112	0.6468	0.723	0.3112	0.3112	0.4605	0.3112	1	0.3112	1.5229	0.5791	1.2055	0.3538	0.3112	1.5944	0.3112	0.5017	0.3112	0.3112	0.6008	0.3112	0.7228	0.3112	0.3112	2.4095	0.3112	1.1055	0.3112	0.3351	0.3112	1.1457	1	2.289	1.7636	0.3112	0.3112	2.1304	4.7703
113	4-hydroxyphenylpyruvate	Amino acid	Phenylalanine & tyrosine metabolism	1669	LC/MS Neg	1716	179.1	979	156-39-8;	C01179	HMDB00707	1.0565	0.7301	1.005	1.4936	0.4717	0.4717	0.6712	0.6228	1.5754	0.4717	0.4717	0.9337	0.4717	0.4717	0.9403	0.4717	1.1476	0.5466	0.6595	0.4717	0.4717	1.5813	0.4717	2.5463	1.2381	0.955	1.1283	0.4717	0.4717	0.4717	0.9695	2.579	0.5861	1.045	0.4717	1	1.4709	0.4717
203	4-methyl-2-oxopentanoate	Amino acid	Valine, leucine and isoleucine metabolism	22116	LC/MS Neg	2200	129.2	70	816-66-0;	C00233	HMDB00695	0.8401	0.9839	0.5554	0.8406	0.8797	1.22	1.8039	2.1432	1.8027	0.9524	0.9108	0.7722	1.8618	1.7495	1.3365	0.8851	0.9714	1.5118	0.6073	1.1404	1.8602	1.4582	1.7552	0.7575	1.0779	0.8491	1.6136	1.4219	0.7152	1.0566	0.9358	0.8852	1.3497	1.2931	0.6755	0.3315	1.7839	0.9003
1423	4-vinylphenol sulfate	Xenobiotics	Benzoate metabolism	36098	LC/MS Neg	3323	199.1	6426766		C05627	HMDB04072	0.3842	2.6059	1.0807	1	5.8822	5.1999	7.3006	1.6379	1.3347	0.9193	3.5915	3.9003	14.7502	2.3265	1.9894	1.2387	0.4434	10.3873	0.1474	0.9728	4.224	2.5637	3.3182	0.2273	0.3888	0.1474	0.4227	0.1474	0.1474	0.1474	0.2458	0.3342	0.6682	0.3327	0.1474	0.2451	2.8158	0.1474
1275	5,6-dihydrothymine	Nucleotide	Pyrimidine metabolism, thymine containing	1418	GC/MS	1504	271.1	93556	696-04-8;	C00906	HMDB00079	0.3666	1.0055	1.0189	1.2724	0.1846	0.1846	0.1846	0.1846	1.3091	0.1846	1.1823	0.4808	0.1846	0.1846	0.1846	0.716	0.6977	0.1846	0.1846	1.1226	0.392	0.8457	0.1846	1.4834	0.7675	1.0871	0.1846	0.1846	1.1826	0.1846	0.462	2.2552	1.0705	0.1846	0.1846	0.8371	1.0108	0.9892
1278	5,6-dihydrouracil	Nucleotide	Pyrimidine metabolism, uracil containing	1559	GC/MS	1505.2	243	649	504-07-4;	C00429	HMDB00076	0.9467	0.3227	0.8086	0.8547	1.1621	0.2869	1.0051	1.3586	0.9734	1.2385	0.9966	0.7218	0.6033	0.2869	0.6825	0.862	1.6703	0.928	1.1813	1.4608	0.8517	0.6686	0.2869	1.2812	1.4087	1.5388	0.7743	0.9012	0.751	0.679	0.4502	2.0746	0.6562	0.9036	1.0034	0.6763	0.7833	1.0266
695	5-dodecenoate (12:1n7)	Lipid	Medium chain fatty acid	33968	LC/MS Neg	5206	197.2	5312378	2430-94-6;		HMDB00529	1.036	1.5401	0.8246	0.2001	0.0854	0.595	0.2211	0.5566	0.5534	1.4013	0.2521	0.7173	0.1874	0.6126	0.5437	0.4171	0.55	0.315	2.5828	2.2793	0.1372	0.113	0.2204	1.504	3.3837	0.4278	2.7522	2.1194	1.5478	1.3106	1.1426	0.2739	0.1753	1.3874	1.5637	1.1016	0.2599	1.3323
281	5-methylthioadenosine (MTA)	Amino acid	Polyamine metabolism	1419	LC/MS Pos	2427	298.1	439176	2457-80-9;	C00170	HMDB01173	0.2424	0.2424	0.2424	0.2424	0.2424	0.2424	0.2424	0.2424	0.2424	0.5423	0.2424	0.977	0.2424	0.2424	0.2424	0.5711	0.2424	0.2424	0.2424	0.2424	0.565	0.2424	0.2424	0.2424	0.2424	0.2424	0.2424	0.8227	0.2424	0.2424	3.1454	0.8027	2.1145	6.7823	1.9632	0.6621	4.3049	1.9914
1282	5-methyluridine (ribothymidine)	Nucleotide	Pyrimidine metabolism, uracil containing	35136	LC/MS Neg	1774	257.1	445408	1463-10-1;		HMDB00884	1.2866	1.33	0.9073	0.7093	1.0648	1.005	0.9277	1.6779	0.9421	1.3152	0.3833	0.9403	0.9452	0.3833	0.3833	0.6751	1.1767	1.0205	0.8353	0.9844	0.3833	0.3833	1	0.8517	1.22	1.0504	0.7228	1.2564	1.1139	1.0207	1.1134	0.7422	1.0852	0.9431	0.3833	0.9771	1.1508	1.3286
297	5-oxoproline	Amino acid	Glutathione metabolism	1494	LC/MS Neg	744	128.2	7405	98-79-3;	C01879	HMDB00267	1.0142	1.3309	0.8834	0.8819	0.8356	0.7783	0.9272	1.0605	0.9432	1.0697	0.9614	0.9858	1.0679	0.7997	1.0505	0.5991	1.1107	1.0606	0.776	0.9006	1.2244	0.9769	0.853	1.1368	1.0403	0.7224	1.6611	1.7664	0.9154	0.8529	0.5113	0.976	1.2739	1.0344	0.7935	2.0799	1.8662	0.7246
1177	5alpha-androstan-3alpha,17beta-diol disulfate	Lipid	Sterol/Steroid	37184	LC/MS Neg	4240	225.3					1.1272	0.2286	0.8405	0.2286	0.3121	0.2286	0.7919	0.535	0.4056	0.2286	1	0.2286	0.2286	0.7556	0.2286	0.2286	0.2286	0.4447	0.2286	0.2286	0.2286	0.7514	0.3373	1.2955	0.2286	2.644	1.1282	3.7571	0.6213	0.8728	37.8312	6.8921	2.2237	3.868	0.6238	0.2286	18.5846	3.4458
1164	5alpha-androstan-3beta,17beta-diol disulfate	Lipid	Sterol/Steroid	37190	LC/MS Neg	3872	225.2				HMDB00493	1	0.3048	0.2683	0.2614	2.7915	0.4131	1.1857	0.668	0.5207	0.2614	0.5502	0.2814	1.3382	2.5518	0.2614	0.4007	0.2614	1.6922	0.2614	0.2614	0.2892	0.2614	2.3644	1.0404	0.3165	0.4058	1.4403	1.4547	0.2614	0.6629	1.6116	0.6743	1.8585	2.1381	0.2614	0.2614	3.1001	2.9904
1167	5alpha-pregnan-3beta,20alpha-diol disulfate	Lipid	Sterol/Steroid	37198	LC/MS Neg	3962	239.3					0.9058	0.3237	0.3237	0.7124	2.6868	0.8457	1.2964	1	0.8149	0.4802	1	0.9549	1.0171	1.3718	0.3237	0.3237	0.3237	0.9979	0.7789	0.8461	0.4444	0.3237	0.9785	0.3237	0.3237	0.3237	4.1462	1.106	0.6319	0.3237	1.5989	1.0122	3.6617	4.1117	0.3237	0.6056	1.4168	3.7096
1157	7-alpha-hydroxy-3-oxo-4-cholestenoate (7-Hoca)	Lipid	Sterol/Steroid	36776	LC/MS Neg	5268	429.4	3081085	115538-85-7;	C17337	HMDB12458	1.0973	1.1613	0.5556	1.0206	0.783	0.4467	0.8021	0.8227	0.7644	0.5155	1.0116	0.478	0.6343	0.7523	0.2622	0.6351	1.5002	0.5349	1.685	1.1924	0.5931	0.6309	0.4859	1.4605	0.9128	1.0602	3.8173	0.9884	0.7437	0.9867	1.7362	1.4861	1.1922	0.637	0.8303	1.4486	1.2444	1.6372
1222	7-methylguanine	Nucleotide	Purine metabolism, guanine containing	35114	LC/MS Pos	1353	166.1	11361	578-76-7;	C02242	HMDB00897	1.2157	1	0.9895	0.874	0.8467	0.426	1.4962	0.8941	1.3752	0.3478	0.9216	1.4693	0.9142	0.3478	0.4586	0.6559	0.7449	0.3478	0.5401	0.4609	0.6641	0.3478	0.594	0.9269	1.0731	1.382	1.8154	0.5661	0.9113	1.202	1.3174	2.0243	1.3977	1.665	0.9199	1.8987	1.5968	1.4733
1808	7-methylxanthine	Xenobiotics	Xanthine metabolism	34390	LC/MS Pos	1778	167.1	68374	552-62-5;	C16353	HMDB01991	1.3075	0.637	0.4399	2.289	1.6881	0.639	2.0609	0.9812	1.2868	0.3945	0.335	1.0194	1.4422	1.2971	0.2726	0.2726	0.3728	0.3366	1.7344	1.2428	0.7444	0.2726	1.2497	0.2726	2.0896	0.8833	1.2695	1.8399	1.5299	0.2726	0.2726	0.4719	0.2726	0.6801	1.4258	0.2726	1	0.2726
985	acetoacetate	Lipid	Ketone bodies	33963	GC/MS	1285	231.1	96	3483-11-2;	C00164	HMDB00060	0.2596	0.9606	1.3648	0.4606	0.3135	0.9687	1.6728	1.0134	0.8544	0.7524	1.019	0.5639	1.2264	4.823	2.2222	0.2966	0.232	0.981	3.397	2.5657	0.8158	0.6575	0.3778	0.9827	2.886	0.788	7.6522	9.2957	29.1934	1.0436	0.9243	0.6487	0.428	5.8981	4.5824	1.0948	0.9866	1.4569
901	acetylcarnitine	Lipid	Carnitine metabolism	32198	LC/MS Pos	1203	204.2	7045767	5080-50-2;	C02571	HMDB00201	0.4041	0.9688	1.0025	0.7252	0.5776	0.4828	0.5711	1.0942	1.3777	1.0219	0.5844	0.9242	0.5476	0.9174	0.9975	0.5606	0.8005	0.6462	1.0356	1.0326	0.474	0.4884	0.7421	0.5027	0.9674	0.7348	2.1555	1.1949	1.2792	0.8515	1.8324	1.0105	0.7938	2.5899	0.9776	0.6432	1.8322	3.8123
670	acetylphosphate	Energy	Oxidative phosphorylation	15488	GC/MS	1263	211	186	94249-01-1;	C00227	HMDB01494	1.3293	0.9145	0.8366	0.9573	1.1304	0.563	1.2414	0.8353	1.2181	1.3303	0.8262	1.199	1.1895	0.8441	1.0332	0.6926	1.1503	0.9376	1.1249	0.9158	1.3419	0.9374	0.9564	0.8468	0.6995	0.9175	1.3326	0.991	0.8706	1.2009	1.1497	0.7821	0.9098	0.7927	1.009	1.5599	1.2408	0.9882
1198	adenine	Nucleotide	Purine metabolism, adenine containing	554	LC/MS Pos	1003	136.1	190	73-24-5;	C00147	HMDB00034	0.6223	0.3321	0.3321	0.3321	1.2012	0.3321	0.3321	0.3321	0.3321	1.4603	1.6849	0.6776	0.3321	0.3321	0.3321	0.6641	0.3321	0.5905	1.1225	0.3321	0.4902	0.8829	0.3321	0.3321	0.3321	0.891	0.3321	0.9763	0.8348	0.3321	0.3321	1.0089	1.0979	3.3948	0.3321	0.3321	1.1075	1.014
785	adipate	Lipid	Fatty acid, dicarboxylate	21134	GC/MS	1520	110.9	196	124-04-9;	C06104	HMDB00448	0.1789	0.1789	0.1789	0.1789	0.1789	0.1789	0.7729	0.4714	0.1789	0.1789	0.1789	0.6391	0.1789	0.1789	0.1789	0.1789	0.1789	0.1789	0.1789	0.3912	0.1789	0.1789	0.1789	0.3099	2.3934	0.1789	1.1291	1.0332	1.6661	0.1789	1.4214	0.9668	0.1789	0.1789	0.4902	0.1789	1.2915	0.1789
499	ADpSGEGDFXAEGGGVR*	Peptide	Fibrinogen cleavage peptide	33801	LC/MS Pos	3490	809					0.4993	0.7432	0.4495	1.2112	2.3416	0.4695	1.089	1.5626	0.3804	0.2176	0.3022	7.2122	1	0.2359	1.5837	0.2176	0.5829	0.9337	0.2176	1.5755	1.7151	0.3353	1.1684	0.2338	0.6205	2.4271	1.08	1.7231	2.092	2.0575	1.5202	1.4011	0.4671	12.6836	1.1519	0.596	0.7051	0.69
735	adrenate (22:4n6)	Lipid	Long chain fatty acid	32980	LC/MS Neg	5684	331.3	5282844	2091-25-0;	C16527	HMDB02226	0.8509	0.6814	0.6147	0.3097	0.6068	0.5143	0.3224	1.1202	0.657	0.9208	0.5386	0.6906	0.3867	0.8083	0.7457	0.8193	0.6589	0.3956	1.9431	1.1138	0.6026	0.4273	0.5572	0.9061	1.7163	1.4188	1.5481	1.2878	1.7877	0.9617	1.134	0.6805	1.0383	1.6305	1.5105	1.1093	1.2085	1.4831
497	ADSGEGDFXAEGGGVR*	Peptide	Fibrinogen cleavage peptide	33084	LC/MS Pos	3239	769	16133137				0.9768	0.656	0.3958	1.3265	1.8251	0.9324	1.064	1.0831	2.0859	0.9606	0.9326	2.4073	0.5324	0.3967	1.25	0.892	0.5746	1.1108	0.8409	0.7003	1.0232	0.8242	1.4671	0.9552	0.7946	1.9051	2.1247	2.0096	1.7314	1.2622	2.4181	1.6071	0.4829	1.0467	1.0895	1.0045	1.3375	0.7313
32	alanine	Amino acid	Alanine and aspartate metabolism	32339	GC/MS	1487.9	232.1	59507311724	56-41-7;	C00041	HMDB00161	2.3545	0.9286	0.5111	1.0866	1.0541	1.3946	1.699	1.3239	1.1246	0.7796	1.0605	1.1159	1.6278	0.7058	2.0714	0.8802	1.0476	1.0401	0.8345	0.9603	0.8953	0.9731	1.1389	1.4861	0.6234	0.9896	0.5618	0.7115	0.3494	1.1137	0.7527	1.9232	1.0263	0.7833	0.7802	0.7656	0.9544	1.0104
1248	allantoin	Nucleotide	Purine metabolism, urate metabolism	1107	GC/MS	1809.8	518.3	204	97-59-6;	C02350	HMDB00462	0.6255	0.1512	0.1512	1.4739	0.6612	1.5067	0.9501	1	1.3663	0.8591	1.0699	3.8072	1.007	0.48	0.1512	0.5081	0.3007	0.1512	0.1512	0.6386	0.1512	1.1036	0.1512	0.301	2.429	0.1512	0.1512	0.3963	0.2005	0.1512	1.0499	2.587	1.05	2.4082	0.8819	0.1512	2.6676	2.1503
189	alpha-hydroxyisocaproate	Amino acid	Valine, leucine and isoleucine metabolism	22132	LC/MS Neg	1854	131.2	83697	10303-64-7;	C03264	HMDB00746	0.2364	0.6961	0.2364	0.8283	0.2364	0.2364	0.8841	0.9109	3.6598	1	0.6335	0.2364	0.9754	0.5479	0.5275	0.5674	0.8771	0.4166	0.2364	0.9075	1.1014	1.3276	0.5742	1	0.8331	2.0239	2.9681	1.4648	0.6179	0.2364	0.3681	1.97	1.1443	1.8887	1.2437	0.2364	2.1509	1.7146
208	alpha-hydroxyisovalerate	Amino acid	Valine, leucine and isoleucine metabolism	33937	LC/MS Neg	1142	117.1	99823	600-37-3;		HMDB00407	0.719	0.4272	0.5308	0.33	0.2181	0.5161	0.2658	0.5619	0.672	1.818	0.3465	0.2477	0.2541	0.1801	0.2652	1.3076	0.4123	0.1723	0.2266	0.4455	0.2042	0.3874	1.0103	1.4222	1.1647	11.9566	11.0199	8.7448	0.62	3.4219	0.9897	2.0902	2.1367	2.7488	2.0914	0.6811	1.3249	1.0742
240	alpha-ketobutyrate	Amino acid	Cysteine, methionine, SAM, taurine metabolism	4968	LC/MS Neg	967	101.1	3593277	600-18-0;	C00109	HMDB00005	0.206	0.206	0.206	0.3344	0.206	0.206	0.7475	1.2958	0.206	0.206	0.206	0.206	0.2779	2.6409	0.7172	0.206	0.206	0.206	1.1367	0.206	0.206	0.5427	0.206	0.2195	1.1389	1.2516	3.7633	4.0596	3.2945	0.4774	1	0.4461	0.206	0.7048	0.206	1.3361	0.206	2.1915
658	alpha-ketoglutarate	Energy	Krebs cycle	33453	GC/MS	1779	419.1	51	305-72-6;328-50-7;22202-68-2;	C00026	HMDB00208	0.5377	0.4597	0.6889	1.3518	0.329	1.655	0.5985	1.8982	0.5685	1.4964	0.8914	0.5286	0.8452	0.9553	1.7013	1.4948	1.2922	0.6316	1.4952	1.8347	0.3191	0.6468	0.7077	0.7431	1.2246	1.258	2.3458	1.1414	0.7992	1.0418	0.4407	2.6831	1.0477	1.5591	0.7571	1.0447	1.24	1.4438
1372	alpha-tocopherol	Cofactors and vitamins	Tocopherol metabolism	1561	GC/MS	2305.4	502.5	14985	59-02-9;10191-41-0;	C02477	HMDB01893	0.6273	0.747	0.5067	1.3	0.8226	0.9016	1.5741	2.0365	1.9987	1.6131	1.7863	1.1235	1.5706	0.7912	0.661	0.6154	1.395	1.1651	2.1633	1.4408	0.8777	0.6833	0.9458	1.009	1.2395	0.6203	2.0216	1.07	0.7441	0.991	0.8309	1.0542	1.4331	0.7716	1.2979	0.8595	1.013	1.0971
1172	andro steroid monosulfate 1*	Lipid	Sterol/Steroid	32827	LC/MS Neg	3925	385.2			C04555	HMDB02759	0.5828	1.6466	1.7697	0.6231	1.4407	0.4812	0.8893	1.0437	1.4955	0.4331	1.2294	1.0008	0.7805	1	0.1044	3.5534	0.3133	0.8171	1.5894	0.3912	0.3406	0.685	2.0261	0.3167	1.3006	2.0065	5.6841	1.2924	0.4474	3.2144	1.5833	0.4072	2.1147	3.3161	0.2044	0.2348	0.1044	1.4474
1173	andro steroid monosulfate 2*	Lipid	Sterol/Steroid	32792	LC/MS Neg	4240	383.2			C04555	HMDB02759	1.0008	2.1393	2.418	0.8482	2.3944	0.7407	2.0099	2.0523	1.3102	0.4812	3.1929	1.0913	1.2208	2.2542	0.1034	2.8643	0.6477	1.1136	2.5736	0.4318	0.9655	3.2084	2.1105	0.5064	0.9992	1.1854	5.889	1.001	1.003	2.352	0.999	0.5883	1.4305	2.0144	0.3514	0.1381	0.0874	0.493
1116	androsterone sulfate	Lipid	Sterol/Steroid	31591	LC/MS Neg	5011	369.2		2479-86-9 ;	C00523	HMDB02759	5.5595	0.2198	0.1165	0.2532	8.4652	1	1.0057	0.3812	0.2898	0.96	0.4815	0.3079	3.8567	3.0818	0.8609	0.275	0.1165	2.9143	0.4255	2.2879	1.0051	0.3541	4.2557	0.6138	0.2423	0.1165	2.7903	1.9318	1.2857	1.5025	1.9476	0.735	1.5398	5.4966	0.1165	0.1807	1.7425	0.3097
614	arabitol	Carbohydrate	Nucleotide sugars, pentose metabolism	15964	GC/MS	1687.5	217	94154	488-82-4;	C00474	HMDB01851	0.8613	0.9438	0.9887	0.9695	0.9609	1.0113	0.9418	1.114	0.9873	1.1286	0.6509	2.4069	0.9945	0.4977	0.969	0.8691	0.7315	0.527	0.5851	1.0055	0.8709	0.7883	0.894	1.0147	1.1724	1.1108	1.115	1.1033	0.5743	0.8408	1.0886	1.4114	1.5978	2.7253	0.8431	0.9202	3.9195	2.4929
1303	arabonate	Cofactors and vitamins	Ascorbate and aldarate metabolism	37516	GC/MS	1736	292.1	122045	7643-75-7;		HMDB00539	0.926	0.7711	1.6955	1	1.091	0.6365	0.2123	0.7858	1.3103	1.2303	1	4.6458	1.1771	0.4681	1.0817	0.7344	0.5443	0.9104	0.1725	0.1725	0.5726	0.6387	0.6008	0.6578	0.5751	0.4599	1.4899	0.7895	0.5835	0.327	1.9648	1.6484	1.2179	3.5292	0.4831	1.0862	1.2079	2.7746
728	arachidonate (20:4n6)	Lipid	Long chain fatty acid	1110	LC/MS Neg	5525	303.4	444899	506-32-1;	C00219	HMDB01043	1.0009	0.7988	0.5165	0.4411	1.3774	0.9526	0.6156	1.1381	0.7605	0.6237	0.7003	0.81	1.0025	1.1984	0.8481	1.336	0.8394	0.6394	1.5899	0.8518	1.0871	0.47	1.0309	0.7031	0.9574	1.711	1.2243	1.0087	1.109	0.9391	1.0528	0.6062	1.1923	0.8474	1.0772	0.9913	1.5076	0.7643
255	arginine	Amino acid	Urea cycle; arginine-, proline-, metabolism	1638	LC/MS Pos	650	175.2	5246487232	1119-34-2;	C00062	HMDB00517	0.613	1.0701	0.9492	2.0208	0.9487	0.8991	1.1414	1.0685	0.6673	0.7991	1.0493	1.2312	0.7079	1.1243	1.0796	0.8829	1.3385	1.1755	1.1074	1.1686	1.0012	1.465	0.8032	0.9465	1.6714	0.804	0.6383	0.9032	1.0148	1.036	0.7415	1.2823	0.9997	0.7742	0.9113	0.9528	1.0394	0.8477
1298	ascorbate (Vitamin C)	Cofactors and vitamins	Ascorbate and aldarate metabolism	1640	GC/MS	1850.1	332.1		134-03-2;	C00072	HMDB00044	0.1486	0.5742	1.887	1.3683	1.3371	0.3643	6.1754	0.6527	4.5503	1.5333	2.55	3.0818	1.1466	1.6926	0.8469	2.112	3.8075	2.9261	0.2814	3.7171	0.6926	0.0251	0.1212	0.1548	0.1005	0.0724	0.277	0.0251	0.8534	0.3266	1.0422	0.7224	2.6428	0.0251	0.174	2.7868	1.3046	0.0656
25	asparagine	Amino acid	Alanine and aspartate metabolism	34283	GC/MS	1854	232.2	62676992089	70-47-3;	C00152	HMDB00168	0.4812	1.0149	0.8033	1.2179	0.5379	0.8897	1.2114	0.7236	0.9984	0.6928	0.5473	0.8218	1.0271	0.8038	1.4374	0.8775	0.9192	1.0618	0.7301	2.1889	0.5803	1.6031	0.7285	1.0432	1.5129	0.8046	0.8685	1.3637	0.8127	0.9212	0.4806	2.6026	1.3996	2.1244	1.1424	1.1232	1.1751	1.3899
24	aspartate	Amino acid	Alanine and aspartate metabolism	35834	GC/MS	1763.1	348.2	5960	56-84-8;	C00049	HMDB00191	1.1206	0.9998	0.8554	1.0421	0.6138	1.0267	0.9641	1.5761	1.4509	1.5669	0.9382	0.8407	1.3381	0.5687	0.4482	0.874	1.3072	0.5061	2.0149	0.8783	0.9405	0.6225	1.0002	1.1133	1.1375	1.628	1.0838	1.0411	0.5665	0.771	0.7735	1.0899	1.8483	0.4729	1.1862	0.9148	1	0.6694
340	aspartylphenylalanine	Peptide	Dipeptide	22175	LC/MS Pos	2538	281.1	93078	13433-09-5;		HMDB00706	3.3989	2.6337	1.8463	1.1463	1.1016	1.8914	1.657	0.8984	2.3855	4.4425	0.7437	0.6451	2.0121	1.1337	0.7453	2.1855	3.6975	0.9907	3.7998	0.551	1.5754	0.774	1.2406	1.7399	1.5054	1.1901	0.9477	1.0093	0.5724	0.7966	0.7793	0.84	0.8794	0.4587	1.5239	0.7289	1.381	0.6746
1625	atenolol	Xenobiotics	Drug	38658	LC/MS Pos	1988	267.2	2249	29122-68-7;	D00235	HMDB01924	1	1	1	1	1	1	1	1	1	1	1	1	1	1	1	1	1	1	1	1	1	1	1	1	1	1	1	1	1	1	1	1	1	1	1	1	1	1
794	azelate (nonanedioate)	Lipid	Fatty acid, dicarboxylate	18362	LC/MS Neg	1322	187.2	2266	123-99-9;	C08261	HMDB00784	0.6202	0.305	0.7684	0.7723	0.3449	0.305	1.4569	0.305	1.0294	0.305	0.305	0.7752	0.9234	0.305	0.305	0.6138	0.305	0.305	0.305	1.0134	0.5992	0.7506	0.305	0.9866	1.1895	0.6271	1.0277	0.305	1.1361	1.095	0.305	1.3868	0.7568	1.2913	1.1651	1.2095	0.6764	1.7911
1408	benzoate	Xenobiotics	Benzoate metabolism	15778	GC/MS	1291.5	179	243	65-85-0;	C00180	HMDB01870	1.0048	1.1908	0.8022	1.6988	1.1887	1.4215	1.1804	1.2223	0.7044	1.5258	1.761	1.2039	1.2122	1.1345	0.6432	2.1188	1.4857	1.0688	1.3201	1.9787	0.8774	1.1984	1.5241	1.1582	1.2646	1.3389	0.7167	0.7001	0.9952	1.1227	0.7107	0.9312	0.7298	0.8295	1.1137	0.795	0.8633	0.5452
1615	benzoylecgonine	Xenobiotics	Drug	39678	LC/MS Pos	3100.7	290.2	442997	519-09-5;	C10847		0.5413	0.5413	0.5413	0.5413	0.5413	0.5413	0.5413	0.5413	0.5413	0.5413	0.5413	0.5413	0.5413	0.5413	0.5413	1	0.5413	0.5413	0.5413	0.5413	0.5413	1.4587	0.5413	0.5413	0.5413	0.5413	0.5413	0.5413	0.5413	0.5413	0.5413	0.5413	0.5413	0.5413	0.5413	0.5413	0.5413	0.5413
28	beta-alanine	Amino acid	Alanine and aspartate metabolism	35838	GC/MS	1582.3	334.1	2394755801	56-41-7;107-95-9;	C00099	HMDB00056	0.7233	0.5941	1.1778	1.0144	1.3748	0.5049	2.2824	1.5761	0.5809	0.8039	1.4756	0.5923	1.6198	0.9922	1.6906	0.9974	1.3047	0.645	0.799	0.948	1.7687	6.5121	1.0786	1.269	3.6256	1.5344	0.4385	0.609	0.2862	0.7135	1.038	4.6572	0.9048	1.3663	1.4535	0.6236	1.6988	0.8766
188	beta-hydroxyisovalerate	Amino acid	Valine, leucine and isoleucine metabolism	12129	LC/MS Neg	1043	117.1	69362	625-08-1;		HMDB00754	0.6406	0.9639	0.8379	0.7373	1.9463	1.1185	0.9915	2.1013	1.7789	1.3025	1.0909	1.207	0.9444	0.9342	0.3226	1.1356	0.688	0.5835	0.5195	0.8507	0.3985	1.2771	0.6602	0.6156	1.8539	0.8427	1.945	1.0085	0.912	0.5555	1.7222	1.2021	0.6657	3.4266	1.0619	0.5075	1.2015	2.1113
7	beta-hydroxypyruvate	Amino acid	Glycine, serine and threonine metabolism	15686	GC/MS	1425.1	221	964	3369-79-7;	C00168	HMDB01352	0.5277	0.5277	0.6174	0.5277	0.5277	0.9995	0.8541	0.6239	1.4997	0.5277	1.007	0.7794	0.5277	0.5277	0.5277	0.5277	0.5277	0.782	1.0384	0.5277	0.6602	0.5277	1.1982	0.6717	0.5407	0.5277	2.1386	1.088	1.0072	1.0048	0.5277	0.5277	1.0277	0.5277	1	0.8499	1.1112	1.2818
1139	beta-sitosterol	Lipid	Sterol/Steroid	27414	GC/MS	2380.8	357.4	222284	83-46-5;	C01753	HMDB00852	0.4395	0.4395	0.5222	2.4769	0.4395	0.4395	0.4395	0.8451	0.7533	0.4395	1.0621	0.4793	0.4395	0.4395	0.4395	0.6991	2.65	0.4395	1.1208	0.8711	0.6219	0.751	0.4395	1.1683	0.765	1.0909	1.1956	1.4198	2.0185	0.9091	0.4395	1.1999	1.2852	1.104	0.7797	0.4395	0.8585	5.224
21	betaine	Amino acid	Glycine, serine and threonine metabolism	3141	LC/MS Pos	721	118.2	247	107-43-7;	C00719	HMDB00043	1.0812	0.9123	0.4949	0.8808	0.8226	0.4674	0.6389	0.5726	0.6321	1.108	0.5694	0.7855	0.5369	0.4721	0.4583	0.8762	1.3184	0.7467	1.2365	0.8991	0.9804	0.5259	1.6772	1.0429	0.9177	1.4777	0.4346	0.491	1.1385	1.331	2.3606	0.9792	1.0229	1.0196	1.9203	2.1618	2.2998	0.5976
1318	bilirubin (E,E)*	Cofactors and vitamins	Hemoglobin and porphyrin metabolism	32586	LC/MS Pos	4625	585.2	5315454				1.1075	1.2851	1.0804	1.3077	0.1701	0.022	1.5181	0.7124	0.871	0.499	1.0066	0.4489	0.7145	0.2689	0.1594	0.3456	2.7986	0.0747	2.2059	2.4297	0.449	0.9143	1.2551	0.9457	1.8104	2.2336	1.9688	1.81	0.3752	1.2654	1.3095	0.7821	2.2421	0.7834	0.6346	1.5663	1.226	1.2653
1319	bilirubin (E,Z or Z,E)*	Cofactors and vitamins	Hemoglobin and porphyrin metabolism	34106	LC/MS Pos	4958	585.3	5799469				1.0724	1	0.7158	1.1999	0.4026	0.4026	0.88	0.8899	0.7914	0.4026	0.7374	0.4026	1.468	0.4026	0.4026	0.4026	2.2831	0.4026	1.2697	5.2981	0.8248	1.4699	0.6672	1.0213	2.4035	1.1287	1.6971	1.041	0.6576	0.9152	0.4026	0.5303	1.3992	1.1561	0.7069	1.0375	0.4385	1.6086
1317	bilirubin (Z,Z)	Cofactors and vitamins	Hemoglobin and porphyrin metabolism	27716	LC/MS Neg	4812	583.2	5280352	635-65-4;	C00486	HMDB00054	0.3442	0.7465	0.535	0.4534	0.1011	0.1005	0.6138	1.1905	0.425	0.6448	0.8256	0.3017	0.4426	0.8397	0.3541	0.3668	1.0716	0.4774	1.0249	2.4687	0.4496	0.508	0.9751	0.6754	0.4608	1.7785	3.3858	2.5013	0.3062	1.0243	6.2017	1.6903	1.8309	1.9457	0.787	1.7396	0.9757	1.0372
1320	biliverdin	Cofactors and vitamins	Hemoglobin and porphyrin metabolism	2137	LC/MS Neg	4671	581.2		55482-27-4;55482-27-4 ;	C00500	HMDB01008	0.7472	0.9517	0.6891	0.5485	0.1579	0.1534	0.4914	0.8992	0.366	0.505	1.142	0.2103	0.3526	0.7222	0.4018	0.3897	1.3559	0.347	1.8965	2.1983	0.3186	0.4418	0.7867	0.993	1.3314	1.6502	2.7855	1.8114	0.5917	1.9585	2.4599	0.8566	1.007	2.0821	0.8482	1.0678	0.6698	1.4724
890	butyrylcarnitine	Lipid	Fatty acid metabolism (also BCAA metabolism)	32412	LC/MS Pos	2007	232.2	213144	25576-40-3;			1.1281	1.3264	1.0531	0.6763	0.7593	1.2936	0.5664	1.1788	0.8604	0.9781	0.8378	1.1635	1.1668	1.0625	0.9985	0.561	1.7345	0.9106	0.8814	0.3802	1.2308	0.5938	1.6796	0.3795	1.0895	0.4724	7.5274	0.9708	0.7474	1.5839	1.4364	0.9974	0.5079	2.9786	1.1518	0.5617	0.6074	2.9083
172	C-glycosyltryptophan*	Amino acid	Tryptophan metabolism	32675	LC/MS Pos	1912	367.1					0.5891	0.6021	1.3085	0.7619	0.8638	0.8071	0.583	1.321	1.3148	0.6769	0.6218	3.3103	0.8241	0.6064	0.747	0.4041	0.5105	0.5944	0.9685	0.4456	0.4812	0.5994	0.6928	0.6001	1.5347	1.1362	1.2378	0.796	0.7828	0.6866	2.108	1.1577	1.562	4.2501	1.0315	1.2934	1.8078	2.6742
1797	caffeine	Xenobiotics	Xanthine metabolism	569	LC/MS Pos	2820	195.1	2519	58-08-2;	C07481	HMDB01847	0.0543	0.9318	1.0525	1.5972	1.8457	2.2189	0.8635	0.2927	0.9086	0.1004	4.0761	0.7739	0.8299	0.5679	0.2179	1.0925	3.2579	2.3321	0.9917	0.396	1.1048	0.3414	1.3642	1.1766	0.2694	1.2753	2.1897	0.6483	0.4842	1.3141	0.7874	3.1925	1.863	1.0914	0.9029	5.3337	3.4644	0.0511
1141	campesterol	Lipid	Sterol/Steroid	39511	GC/MS	2353	343.4	173183	474-62-4;	C01789	HMDB02869	0.4714	0.4714	0.8183	2.6841	0.4714	0.4714	0.4735	0.9745	0.8904	0.4714	0.9576	0.487	0.4714	0.7332	0.4714	1	2.2888	1.1396	1.1366	1.1376	0.4714	1.2019	0.4714	1.3145	0.4714	1.7763	1.1459	1.0424	1.2093	0.9899	0.742	1.228	2.1405	0.5572	0.4897	0.4714	0.5006	2.406
691	caprate (10:0)	Lipid	Medium chain fatty acid	1642	LC/MS Neg	5092	171.2	2969	112-37-8;	C01571	HMDB00511	1.075	1.2437	0.9626	1.3785	0.6221	3.2018	0.9287	1.1981	1.2085	1.174	1.2053	1.3593	0.8747	1.2062	0.5556	1.044	0.9191	0.9626	1.5856	1.6552	0.8926	1.0529	0.7718	1.52	1.2502	0.5074	1.3851	3.4334	3.1515	0.956	0.5024	2.1025	0.3239	1.0885	0.9712	0.9843	0.6232	0.9536
687	caproate (6:0)	Lipid	Medium chain fatty acid	32489	LC/MS Neg	2766	115.2	8892	142-62-1;	C01585	HMDB00535	1.0975	1.3376	0.7307	1.7848	1.2018	2.3093	1.1517	1.3029	0.5537	0.998	2.1396	1.3339	0.9884	1.4365	0.5289	1.8243	1.197	1.1622	1.0687	0.7648	1.1874	1.5499	0.91	1.5974	1.2608	0.6992	1.002	0.8083	0.9338	0.9616	0.5234	1.2352	0.6199	0.5145	1.2376	0.8641	1.0116	0.6764
689	caprylate (8:0)	Lipid	Medium chain fatty acid	32492	LC/MS Neg	4367	143.2	379	124-07-2;	C06423	HMDB00482	1.3749	1.096	0.7789	2.6108	0.892	3.0278	1.0754	1.2076	0.756	0.9442	1.8247	1.7541	0.8213	1.3076	0.4356	1.8531	1.5094	1.0318	1.2091	0.7895	1.0708	1.8306	0.7853	1.3802	1.4013	0.7372	0.8593	2.5274	2.9431	0.9895	0.3992	2.0032	0.3858	0.6901	0.9696	0.7813	1.0105	0.7791
899	carnitine	Lipid	Carnitine metabolism	15500	LC/MS Pos	702	162.2	10917	461-05-2;	C00318		0.9966	1.079	1.0135	1.021	1.1476	0.9426	1.0068	1.1885	1.121	0.9618	1.0492	0.4135	0.9513	0.935	1.4822	1.2345	1.0034	1.2752	1.0889	0.8253	0.8893	0.8603	1.0517	0.6239	0.7469	0.9403	1.2509	1.3294	1.205	1.2884	0.4679	1.2232	0.9025	1.4372	0.3508	0.3454	0.5461	1.8442
1407	catechol sulfate	Xenobiotics	Benzoate metabolism	35320	LC/MS Neg	1928	188.9	3083879		C00090		0.509	0.8688	1.6954	1.3486	9.6126	5.3428	3.823	3.2594	4.1742	1.4312	3.1829	3.1579	2.3775	2.4103	1.6372	0.5228	1.6832	7.3112	0.4007	0.9331	13.4132	2.8897	2.2987	1.2005	0.3597	0.0488	0.4352	0.0717	0.0488	0.0512	0.3318	1	2.1443	0.4238	0.0488	0.0488	0.6252	0.1157
1595	celecoxib	Xenobiotics	Drug	38599	LC/MS Neg	5257.9	380.2	2662	169590-42-5;	D00567,C07589	HMDB05014	1	1	1	1	1	1	1	1	1	1	1	1	1	1	1	1	1	1	1	1	1	1	1	1	1	1	1	1	1	1	1	1	1	1	1	1	1	1
921	chenodeoxycholate	Lipid	Bile acid metabolism	37789	LC/MS Neg	5250	391.4		474-24-9;474-25-9;	C02528	HMDB00518	3.5257	0.2776	0.2776	4.1283	0.2776	0.2776	0.2776	0.2776	4.4627	0.3088	0.2776	0.3823	0.2776	0.2776	1	0.9451	0.852	0.2776	0.2776	1.5329	0.6415	4.438	0.2776	1	5.7966	1.6389	0.2776	0.2776	0.6652	1.0989	0.8797	4.1721	2.9871	0.5636	0.2776	0.3099	2.5437	0.6193
972	chiro-inositol	Lipid	Inositol metabolism	37112	GC/MS	1857	318.1		643-12-9;			0.1999	0.1999	1.2821	0.1999	0.1999	0.2028	0.1999	0.1999	0.1999	0.1999	2.8178	10.759	0.1999	2.8172	0.1999	0.1999	0.3188	0.3519	0.1999	4.7247	0.1999	0.1999	0.1999	0.1999	0.3663	0.1999	0.1999	0.1999	0.1999	0.1999	0.1999	1	0.8235	0.1999	0.1999	0.1999	5.3547	0.1999
916	cholate	Lipid	Bile acid metabolism	22842	LC/MS Neg	5148	407.4		81-25-4;	C00695	HMDB00619	3.3352	7.237	0.2937	2.2136	0.2382	0.4649	1.2911	0.8458	7.1288	1.523	0.9973	0.4686	0.2382	0.8887	1.8345	2.0354	0.6428	1.5968	0.8582	0.4457	0.2758	29.1254	0.8733	0.8999	7.6828	2.4208	0.2382	0.2382	0.2382	1.0657	2.16	3.1794	21.7923	0.4771	0.2382	0.7103	4.5598	0.9178
1102	cholesterol	Lipid	Sterol/Steroid	63	GC/MS	2316.9	329.3	6432564	57-88-5;	C00187	HMDB00067	0.962	0.7908	0.5942	1.2093	0.8002	1.0571	0.9629	1.3138	0.8994	1.4275	1.234	0.8791	0.6552	0.6455	0.7933	0.8752	1.5698	0.7201	1.0313	0.8727	0.8031	0.8161	0.9124	1.0437	0.8529	1.5133	1.7286	1.3692	1.2979	1.1975	0.9194	1.3822	1.6468	0.6653	1.145	0.8399	1.8846	1.4081
960	choline	Lipid	Glycerolipid metabolism	15506	LC/MS Pos	674	104.2	170746	67-48-1;	C00114		0.8993	1.0097	0.8551	0.8347	0.8436	0.9903	1.1802	1.5249	1.2621	1.4765	1.0447	1.7027	1.4727	1.2745	0.9705	0.9059	0.9947	1.2487	1.0614	1.0465	1.0053	0.714	0.9538	1.1597	1.3169	1.1634	0.2754	0.4634	0.6591	1.1214	0.6642	1.0163	1.091	0.4894	0.88	0.78	0.7295	1.3054
908	cis-4-decenoyl carnitine	Lipid	Carnitine metabolism	38178	LC/MS Pos	4404	314.3		98930-66-6;			0.3313	1.6255	0.785	0.4439	0.4405	0.3044	0.4077	1.7958	0.9955	0.5529	0.8919	2.5627	0.6644	0.8508	1.608	0.5272	1.1209	0.907	1.254	0.7579	0.5893	0.4621	0.8158	1.0045	1.9445	1.1456	1.1481	0.9501	1.9164	0.6407	1.8016	1.5409	0.5705	3.838	0.9001	1.0499	1.0441	3.5504
710	cis-vaccenate (18:1n7)	Lipid	Long chain fatty acid	33970	GC/MS	1987	339.3	5282761	693-72-1;	C08367		1.0006	0.8564	0.8242	0.6008	0.4492	0.5056	0.4996	0.7603	1.0438	1.6308	0.8175	0.5128	0.7304	1.0737	0.6706	0.7573	0.8907	0.478	1.4886	1.7404	0.1907	0.8019	0.597	0.9994	2.3194	0.7372	2.0458	1.8258	1.3254	1.6799	1.4648	0.9263	0.253	2.4355	1.7715	1.4723	0.8856	1.5207
648	citrate	Energy	Krebs cycle	1564	GC/MS	1763.4	273.1	311	77-92-9;	C00158	HMDB00094	1.006	0.9926	0.9053	1.2989	0.5246	0.6322	1.2377	1.2147	1.4297	0.7987	0.808	0.8968	0.3898	0.4783	0.677	0.3623	1.3882	0.452	1.0074	1.2374	0.5681	0.9598	0.9032	1.3004	1.2128	1.2397	2.6742	1.4546	0.601	0.6821	0.7774	2.3265	0.8567	0.6098	1.1137	1.4736	0.7287	0.8751
263	citrulline	Amino acid	Urea cycle; arginine-, proline-, metabolism	2132	LC/MS Pos	715	176.1	833	372-75-8;	C00327	HMDB00904	0.4953	1.9698	1.8604	1.1482	1.2297	0.7228	1.1384	1.2338	0.9646	1.0283	0.9717	2.1009	1.4047	1.0827	1.5147	0.4083	1.5909	1.0291	0.7474	1.1196	1.3678	1.6567	0.9684	1.5497	3.0295	0.8728	0.5807	0.7819	0.2307	0.6918	0.2443	1.9045	0.5586	0.5745	0.9005	0.7168	0.7924	1.4179
1133	cortisol	Lipid	Sterol/Steroid	1712	LC/MS Pos	4573	363.2		50-23-7;	C00735	HMDB00063	0.6101	0.5373	0.438	0.4212	1.0332	0.5863	0.6481	1.2076	0.8595	0.9607	0.6183	1	0.94	0.9445	0.0862	0.4389	0.4676	0.7741	1.9429	0.2648	0.4439	0.752	1.3693	0.0862	0.8171	1.4526	2.5609	1.4596	2.4298	0.5014	1.6687	1	0.3239	2.6938	1.3565	1.634	0.0862	1.1221
1135	cortisone	Lipid	Sterol/Steroid	1769	LC/MS Pos	4420	361.2	222786408722	53-06-5;	C00762	HMDB02802	1.3138	1.5155	0.8596	1.0279	1.0264	0.5133	1.0347	1	1.3024	1.3698	0.9831	0.7342	0.798	0.7708	0.4411	0.7584	1.0186	1.4364	1.7052	0.6613	0.5714	1.487	1.24	0.4411	0.9202	0.7293	1.2279	1.2066	1.2103	0.6932	0.8632	0.8864	0.4411	0.9439	1.1982	0.8606	0.4411	1.0053
1132	cortodoxone	Lipid	Sterol/Steroid	17800	LC/MS Pos	4877	347.2	440707	152-58-9;	C05488	HMDB00015	0.332	0.332	0.332	0.332	0.332	0.332	0.332	0.332	0.332	0.332	0.332	0.332	0.332	0.332	0.7662	0.332	0.332	0.332	1	0.332	0.5781	0.332	0.3704	0.332	0.332	1.3398	1.0213	0.6279	6.6284	0.332	0.332	0.332	0.332	1.9189	0.332	1.1181	0.332	0.332
1812	cotinine	Xenobiotics	Tobacco metabolite	553	LC/MS Pos	1493	177.1	854019	486-56-6;		HMDB01046	0.0819	0.0819	0.6689	0.1334	3.6842	0.6836	2.1119	1.3697	0.8038	0.0819	0.0819	0.0819	0.0819	1.3456	2.5674	1.6061	0.0819	0.923	2.3671	0.0819	3.2333	1.3514	0.0819	0.0819	0.0819	1.3948	0.1242	0.0819	0.0819	0.8507	0.9752	0.6049	4.1527	1.1493	0.0819	0.0819	0.6903	0.0819
274	creatine	Amino acid	Creatine metabolism	27718	LC/MS Pos	758	132.1	586	57-00-1;	C00300	HMDB00064	0.5338	0.4778	0.2836	0.906	0.7429	0.4068	1.249	1.1966	0.7743	0.5605	0.6252	0.3594	0.8623	0.9997	0.5792	1.5797	0.861	1.0003	2.2662	0.6823	0.7567	1.2734	0.5281	0.8435	1.0865	1.1709	0.5158	0.8161	2.9354	1.6588	1.3492	0.4489	0.9135	6.8282	1.0382	1.0046	0.6188	5.6449
275	creatinine	Amino acid	Creatine metabolism	513	LC/MS Pos	730	114.1	588	60-27-5;	C00791	HMDB00562	0.8046	1.0793	1.4668	0.8198	1.2912	0.5636	0.813	1.0958	0.928	0.7046	1.0399	1.6064	1.0605	1.1296	1.2502	1.057	0.8194	0.7885	0.5217	0.9368	0.8989	0.8813	0.7894	0.8151	1.399	1.1072	1.4322	0.8523	0.6936	1.0195	0.9434	1.4963	0.9462	2.7765	0.5972	1.0008	1.1751	2.0529
383	cyclo(leu-pro)	Peptide	Dipeptide	37104	LC/MS Pos	3445	211.1	7074739				1.2838	0.7424	0.622	0.7183	1.7719	0.8061	0.4507	0.452	0.8633	5.0786	1.6898	1.4013	0.4561	0.6278	0.4876	1.9094	1.2432	1.0705	0.5606	1.1387	0.7473	0.2673	2.3661	1.0256	0.9398	1	0.4959	1.0498	0.8701	2.1957	1.1443	2.1387	0.6903	0.7897	1.4019	0.6132	1.9579	0.2673
387	cyclo(phe-phe)	Peptide	Dipeptide	38152	GC/MS	2057	347.2		2862-51-3;			0.1547	1.2991	0.6227	1.5257	1.5015	1.451	1.1076	1.2836	0.6541	0.9892	0.1547	1.8602	0.7095	0.4968	0.1547	1	1.5109	0.1547	1.3932	0.6683	1.2525	0.1547	1.5878	0.8151	1.0682	2.4845	1.0825	1.0108	0.7545	1.4231	1.083	0.957	0.784	0.7695	0.9181	0.1547	0.686	0.1547
377	cyclo(phe-pro)	Peptide	Dipeptide	37095	LC/MS Pos	3651	245.1	9837725				1.0089	0.4881	0.6626	0.5872	0.6495	0.8186	0.6133	0.4881	1.3865	11.9623	1.622	0.4881	0.4881	0.4881	0.4881	1.2764	0.5715	1	0.4881	0.4881	0.4881	0.4881	1.5223	0.779	0.806	1.2171	0.4881	0.8407	1.3109	1.555	1.3554	1.5007	0.4881	1	1.0226	0.6617	1.5007	0.4881
224	cysteine	Amino acid	Cysteine, methionine, SAM, taurine metabolism	31453	GC/MS	1560.1	218	58626419722	52-90-4;56-89-3;	C00097	HMDB00574	0.5507	0.7653	1.5245	0.9817	0.9231	0.7884	2.4029	1.4356	0.7113	1.0369	1.4787	1.8557	0.9919	1.3182	0.5232	1.1261	1.9421	1.6042	0.6351	1.4802	1.1319	0.2875	0.244	1.1773	0.963	0.892	0.4804	0.244	0.3529	0.6666	0.9212	0.7101	1.4145	1.2497	0.4268	1.1234	0.6357	1.0799
1316	D-urobilin	Cofactors and vitamins	Hemoglobin and porphyrin metabolism	40084	LC/MS Pos	4621	589.3		3947-38-4;			3.0241	0.1897	0.68	1.4885	0.1897	0.1897	0.1897	0.1897	0.1897	1	0.6014	0.4225	0.1897	0.1897	0.3572	1.7869	1.4811	0.1897	8.1647	4.5259	0.527	1.9727	0.4522	0.7345	0.4323	0.3229	8.1162	4.4461	0.6914	0.9949	0.4555	3.6369	6.0556	1.9513	0.5935	0.1897	0.1897	0.297
906	decanoylcarnitine	Lipid	Carnitine metabolism	33941	LC/MS Pos	4700	316.3	10245190	1492-27-9 ;		HMDB00651	0.4567	2.1488	1.0057	0.408	0.5249	0.4263	0.3488	1.4383	0.9744	0.5495	0.7614	9.3058	0.607	0.6764	1.23	0.4099	0.9466	0.5658	1.435	0.703	0.6404	0.4363	0.9752	0.9023	1.845	1.3628	1.1714	1.3026	1.0256	0.8011	2.1101	1.2098	0.8375	4.2547	0.9116	0.9943	1.3008	3.9909
1112	dehydroisoandrosterone sulfate (DHEA-S)	Lipid	Sterol/Steroid	32425	LC/MS Neg	4771	367.2	12594		C04555	HMDB01032	5.946	0.3928	0.2982	0.4935	8.4465	1.0124	1.3063	1.1111	0.4939	1.5456	0.7259	0.2657	3.5747	3.6388	0.3727	1.0976	0.3965	1.6829	1.0407	0.9661	1.2504	0.9876	4.7925	0.2115	0.4025	1.1648	3.7358	1.4555	1.6675	1.775	0.9263	0.296	0.8677	6.838	0.3039	0.1489	0.3466	0.9318
898	deoxycarnitine	Lipid	Carnitine metabolism	36747	LC/MS Pos	759	146.1	725	6249-56-5;	C01181	HMDB01161	1.0448	1.1129	0.7446	0.7012	1.1554	0.5421	1.0154	1.1911	0.807	1.0995	0.9319	1.1241	1.0424	0.9871	1.1716	0.9205	0.7053	0.9427	0.5614	0.9178	0.9091	1.2104	1.0129	1.1431	1.6843	1.1663	1.4081	1.103	0.7602	1.272	0.5642	1.5664	0.8114	1.7767	0.7123	0.7075	0.7587	2.5359
926	deoxycholate	Lipid	Bile acid metabolism	1114	LC/MS Neg	5268	391.4	440355	83-44-3;	C04483	HMDB00626	0.0729	3.3252	0.0729	0.0729	0.1635	0.4096	1.8941	2.8559	1.6866	0.704	1.0626	0.0729	2.0626	0.4754	1	0.0729	0.614	2.0714	0.3839	11.2354	0.9088	1.4569	1.119	1	1.1363	0.0729	0.3884	0.0729	0.0729	0.0729	0.0729	0.0729	0.0729	0.0729	0.0729	0.0729	0.0729	0.0729
1566	desmethylnaproxen sulfate*	Xenobiotics	Drug	34346	LC/MS Neg	2324	295.2	184679				1	1	1	1	1	1	1	1	1	1	1	1	1	1	1	1	1	1	1	1	1	1	1	1	1	1	1	1	1	1	1	1	1	1	1	1	1	1
1493	dexpanthenol	Xenobiotics	Chemical	38314	LC/MS Pos	2293	206.2	4678	16485-10-2;	D03726	HMDB04231	0.5648	0.5648	0.5648	0.5648	0.5648	0.5648	0.5648	0.5648	0.5648	0.5648	0.5648	0.5648	0.5648	0.5648	0.5648	0.5648	0.5648	0.5648	0.5648	0.5648	0.5648	0.5648	0.5648	0.5648	0.5648	0.5648	0.5648	0.5648	0.5648	0.5648	0.5648	0.5648	0.5648	0.5648	0.5648	0.5648	0.5648	1
724	dihomo-linoleate (20:2n6)	Lipid	Long chain fatty acid	17805	LC/MS Neg	5722	307.3	6439848	2091-39-6;	C16525		1.0014	1.0024	0.5935	0.3233	0.1656	0.2723	0.2142	0.9986	1.0297	1.4442	0.4082	0.3791	0.4745	0.9976	0.7346	0.5339	0.6078	0.3835	1.4352	2.6803	0.3064	0.1693	0.2216	1.6315	2.434	0.7867	1.6173	1.0887	2.1938	1.1413	1.4951	0.4651	0.2946	2.8086	1.5961	1.2383	0.7277	2.3205
678	dihomo-linolenate (20:3n3 or n6)	Lipid	Essential fatty acid	35718	LC/MS Neg	5600	305.4	5312529		C03242	HMDB02925	1.3155	0.9651	0.5562	0.6217	0.7764	0.7891	0.4492	1.4958	0.8251	1.1434	0.6539	0.6829	1.191	1.48	0.9467	1.5822	0.8224	0.8117	1.6576	1.7425	0.8156	0.4137	0.6378	0.9809	0.969	0.8042	1.6108	1.2988	1.3832	1.0191	1.7255	0.4985	0.4138	1.1556	1.4107	1.1027	0.6974	1.0929
1104	dihydrocholesterol	Lipid	Sterol/Steroid	21131	GC/MS	2320.8	215.2	6665	80-97-7;		HMDB00908	0.9685	0.6521	0.8475	0.9608	0.6388	0.5029	0.2225	1.1131	0.8596	0.9181	0.6928	0.309	0.2989	0.2225	0.4417	1.0084	0.9916	0.2225	1.165	0.5686	0.4106	0.8385	0.5805	0.6228	1.0233	2.9132	1.2618	1.0819	2.6326	2.2075	1.7811	2.0045	3.5933	0.902	2.6465	1.1701	4.9505	2.4161
1268	dihydroorotate	Nucleotide	Pyrimidine metabolism, orotate containing	601	GC/MS	1730.4	257	648	155-54-4;	C00337	HMDB03349	0.9768	0.9478	0.796	1.2002	0.4511	1.0433	1.4836	1.1789	0.3616	0.9445	0.8785	0.9483	0.6254	0.7422	1.2015	0.3616	1.1002	0.9567	0.7685	1.5697	1.2724	1.9031	0.788	1.4775	1.1363	0.9533	0.7093	1.6598	0.707	1.0341	0.3616	2.5832	1.4371	0.5227	1.3364	1.229	1.8165	0.5491
3	dimethylglycine	Amino acid	Glycine, serine and threonine metabolism	5086	GC/MS	1030	57.9	6971056673	1118-68-9;	C01026	HMDB00092	0.5247	1	0.8566	3.3593	1.0252	1.5016	0.8726	2.2412	1.1266	1.1119	0.819	1.833	0.9425	0.6916	0.6621	0.7426	0.8466	0.7231	0.5542	0.5338	0.8772	0.5001	1.0644	0.9138	1.3606	0.9597	0.2108	0.2108	1.0187	0.8303	0.9321	1.5618	0.9601	2.0961	1.6622	0.4833	1.152	4.0017
733	docosadienoate (22:2n6)	Lipid	Long chain fatty acid	32415	LC/MS Neg	6017	335.4	5282807	7370-49-2 ;	C16533		0.7601	0.7486	0.6665	0.4108	0.1702	0.4209	0.3284	0.8179	1.1986	1.8297	0.5722	0.4035	0.3687	0.6485	0.6806	0.5965	0.4958	0.3134	2.7172	1.4062	0.2624	0.343	0.3183	1.1088	3.1098	1.0811	2.5994	1.8171	2.5177	1.1685	1.6391	0.5713	0.5301	2.9596	2.1211	1.3158	0.9004	2.845
682	docosahexaenoate (DHA; 22:6n3)	Lipid	Essential fatty acid	19323	LC/MS Neg	5518	327.3	445580	6217-54-5;	C06429	HMDB02183	1.5208	1.0323	0.4643	0.4947	0.8895	0.5024	0.553	1.5081	0.7295	0.4659	0.5839	1.0357	0.9481	1.1661	0.7686	1.1158	0.6994	1.3083	2.4014	3.1572	1.4916	0.3344	0.4381	0.9523	1.3676	0.9643	1.6344	1.101	1.4061	0.8629	0.788	0.3626	0.789	1.3353	1.8653	1.0663	0.7925	1.39
680	docosapentaenoate (n3 DPA; 22:5n3)	Lipid	Essential fatty acid	32504	LC/MS Neg	5574	329.4		2234-74-4 ;	C16513	HMDB01976	1.013	0.7734	0.5258	0.218	0.2666	0.4717	0.2869	1.0643	0.7756	0.992	0.3139	0.2407	0.4438	1.2653	0.8048	0.4431	0.4347	0.6359	2.8253	1.8723	0.5062	0.2374	0.3518	1.0829	1.8555	1.0637	1.9275	1.5922	1.4428	0.699	0.9786	0.4161	0.3269	1.7273	2.7396	1.3728	0.5914	1.1172
681	docosapentaenoate (n6 DPA; 22:5n6)	Lipid	Essential fatty acid	37478	LC/MS Neg	5625	329.4	6441454	25182-74-5;	C16513	HMDB13123	1.515	1.0693	0.3988	0.4866	0.9928	1.1237	0.4715	1.9961	1.0552	0.5905	1.2526	1.382	0.8103	1.6068	0.9611	2.3121	0.5853	0.5551	2.3671	1.8686	0.6919	0.4271	0.8335	1	1.4403	0.9275	1.5652	1.3357	1.6759	1.2144	0.9932	0.8017	0.793	0.7204	0.9583	0.9175	0.8467	1.0929
796	dodecanedioate	Lipid	Fatty acid, dicarboxylate	32388	LC/MS Neg	2990	229.2	12736	693-23-2 ;	C02678	HMDB00623	1.3971	0.7315	1.1964	1.3102	0.53	1.4194	0.7188	0.7614	0.8797	0.2479	0.2479	1.099	1.4782	1.0576	1.5205	0.5563	0.2479	0.2479	0.9237	1.262	0.8292	0.4899	0.4113	0.7986	1	1.1987	1.9257	1.6589	1.1911	0.7017	1.5662	1.4539	1.4743	1.2356	0.8493	1.6468	1.2365	0.5386
498	DSGEGDFXAEGGGVR*	Peptide	Fibrinogen cleavage peptide	31548	LC/MS Pos	3379	733.5					0.3222	0.4477	0.2733	1.6176	2.1736	0.6568	0.9839	1.1546	0.3699	0.2189	0.7563	2.8485	0.502	0.6359	1.2906	0.6963	0.292	2.2403	0.3732	1.2855	1.2464	0.5982	1.4951	1.9048	0.4293	3.4306	1.9948	2.3837	2.6309	1.8165	2.0763	2.5565	0.068	2.5098	1.2336	1.0351	1.0053	0.4935
804	eicosanodioate	Lipid	Fatty acid, dicarboxylate	39831	LC/MS Neg	5199.1	341.4	75502	2424-92-2;			1.1655	1.1256	0.7851	1.5476	1.06	0.565	1.725	0.9725	0.9397	0.7566	0.8743	0.3385	0.614	0.7759	0.9406	0.6921	1.3256	0.6207	1.2044	1.7965	1.1465	0.5405	1.3667	2.1938	1.378	0.923	1.6714	1.7452	0.8485	0.4684	2.8579	0.8217	1.1362	0.9338	1.0594	0.7553	0.5531	1.1607
679	eicosapentaenoate (EPA; 20:5n3)	Lipid	Essential fatty acid	18467	LC/MS Neg	5442	301.3	446284	10-2005-9;10417-94-4;	C06428	HMDB01999	1.0299	0.7986	0.6779	0.5352	0.9474	0.9586	0.5751	0.8797	0.7988	0.6419	0.4615	0.7908	0.9991	1.4611	0.8751	0.997	0.6463	1.7521	1.3577	1.3564	1.6457	0.4181	0.6997	0.7784	1.0724	1.1767	1.3381	1.3985	1.4957	0.7436	0.8839	0.4162	0.6807	1.0009	2.2624	1.3385	1.1531	0.9622
722	eicosenoate (20:1n9 or 11)	Lipid	Long chain fatty acid	33587	LC/MS Neg	5955	309.4				HMDB02231	0.7251	0.9988	0.7712	0.2762	0.1072	0.467	0.3453	0.6641	0.9956	1.537	0.537	0.2283	0.3893	0.8963	0.7485	0.2997	0.5121	0.5954	2.7614	1.9565	0.187	0.3163	0.2708	1.2967	2.4408	0.6283	2.3072	1.6097	2.1407	1.3763	1.7155	0.5192	0.3172	3.2476	2.1795	1.2958	0.7187	2.5845
1113	epiandrosterone sulfate	Lipid	Sterol/Steroid	33973	LC/MS Neg	4838	369.3		22229-22-7;	C07635	HMDB00365	2.3016	0.2153	0.2153	0.2153	7.3363	0.537	0.9455	0.5727	0.2153	0.5939	0.303	0.2153	4.6457	2.8051	1	0.7169	0.2153	2.4212	0.3039	1.454	0.926	0.2153	2.478	0.2153	0.2153	0.734	1.905	1.1262	0.4875	1	1.6886	0.5776	1.2331	4.6761	0.2153	0.2153	0.5816	1.2693
1818	erythritol	Xenobiotics	Sugar, sugar substitute, starch	20699	GC/MS	1517.5	217		149-32-6;	C00503	HMDB02994	0.6821	0.4991	1.4795	1.021	0.8524	0.9444	0.7267	16.0194	2.3833	1.0363	0.684	3.4752	0.8682	0.4977	0.984	0.7445	0.5863	0.5222	0.3733	0.5199	0.3909	0.665	0.6278	0.595	1.403	1.544	1.876	0.7395	0.6208	0.8755	1.7602	2.0924	7.2427	3.4408	0.7776	1.0464	1.9631	5.3831
515	erythronate*	Carbohydrate	Aminosugars metabolism	33477	GC/MS	1546.9	292.1	2781043	88759-55-1;		HMDB00613	0.7709	0.5773	1.6805	0.8308	1.1121	1.2062	0.6437	1.4047	1.3803	1.2398	0.6315	4.0939	0.9462	0.3962	1.0885	1.0063	0.7765	0.4042	0.5369	0.6428	0.4327	0.5963	0.8619	0.4771	1.4487	1.5666	1.7755	0.706	0.8623	0.5834	1.9032	1.6643	2.0904	5.3499	0.6926	0.9175	1.4259	5.8128
1631	escitalopram	Xenobiotics	Drug	40459	LC/MS Pos	3855	325.2	146570	219861-08-2;		HMDB05028	0.2106	0.2106	0.2106	0.2106	0.2106	0.2106	0.2106	0.2106	0.2106	0.2106	0.2106	0.2106	0.2106	0.2106	0.2106	0.2106	0.2106	0.2106	0.2106	0.2106	0.2106	0.2106	0.2106	0.2106	0.2106	0.2106	0.2106	0.2106	0.2106	0.2106	0.2106	0.2106	0.2106	0.2106	0.2106	0.2106	0.2106	0.2106
1860	ethyl glucuronide	Xenobiotics	Detoxification metabolism	39603	LC/MS Pos	1574.1	240	152226	17685-04-0;			0.1475	0.1475	0.1475	0.1475	0.935	0.1475	0.1475	0.1475	0.7463	1.8525	0.1475	0.1475	0.1475	0.1475	0.1475	1.3048	0.1475	0.1475	0.1475	0.1475	0.1475	0.1475	0.1475	1.065	0.1475	0.1475	0.1475	0.1475	0.1475	0.1475	0.1475	0.1475	0.1475	0.1475	0.1475	0.1475	0.7108	0.1475
537	fructose	Carbohydrate	Fructose, mannose, galactose, starch, and sucrose metabolism	577	GC/MS	1758	217	5984	57-48-7;	C00095	HMDB00660	0.8871	0.2158	0.9266	2.3165	0.5357	1.8326	4.1971	0.443	1.8956	4.6784	0.6103	0.9105	0.4264	0.5338	0.8514	1.0903	0.4946	0.403	0.7441	1.5988	0.3217	0.5151	6.395	0.3027	0.408	5.1363	2.3043	1.0578	1.0895	0.5334	5.9679	3.1364	5.9511	1.5141	0.4442	1.2699	1.3605	1.6181
523	fucose	Carbohydrate	Aminosugars metabolism	15821	GC/MS	1682.2	204	3034656	2438-80-4;	C02095	HMDB00174	0.7363	0.5116	0.9977	1.066	0.5247	1.1536	0.4625	1.7172	2.2478	1.188	0.798	0.993	0.9727	0.937	0.8748	0.5977	0.5753	0.3251	1.2644	0.3403	0.7618	0.6764	0.7251	0.8579	1.4284	0.8118	1.1845	0.925	1.1819	1.2912	0.5882	1.7972	1.6193	3.5123	0.8908	1.0023	1.3834	2.2135
663	fumarate	Energy	Krebs cycle	1643	GC/MS	1382.1	245		100-17-8;	C00122	HMDB00134	0.9116	0.7642	0.8142	0.6472	0.6139	0.9161	0.7811	1.2707	1.2451	1.2948	0.994	0.4744	0.8432	0.5681	0.8233	0.8282	1.2129	0.6116	1.5312	1.2092	0.5873	0.6624	0.851	0.7892	0.7683	1.1499	2.7671	1.0149	0.857	1.0448	1.0133	1.8212	1.0174	1.2903	1.0662	1.3668	1.5818	1.1581
1612	gabapentin	Xenobiotics	Drug	38686	LC/MS Pos	2482	172.2	34466919078	60142-96-3;	D00332	HMDB05015	0.0691	0.0691	0.0691	0.0691	0.0691	0.0691	0.0691	0.0691	0.0691	0.0691	1	0.0691	0.0691	0.4763	0.0691	0.0691	0.0691	0.0691	0.0691	0.0691	0.0691	0.0691	0.0691	0.0691	0.0691	0.0691	0.0691	0.0691	0.0691	0.0691	0.0691	0.0691	0.0691	0.0691	0.0691	2.0061	0.0691	0.0691
538	galactitol (dulcitol)	Carbohydrate	Fructose, mannose, galactose, starch, and sucrose metabolism	1117	GC/MS	1849.2	319.1	11850	608-66-2;	C01697	HMDB00107	0.5333	0.5333	0.5333	0.5333	0.5333	0.5333	0.5333	0.5333	0.5333	0.5333	0.5333	1	0.5333	0.5333	0.7143	0.5333	0.5333	0.5333	0.5333	0.5333	0.5333	0.5333	0.5333	0.5333	0.6764	0.5333	0.5333	0.6783	0.5333	0.5333	0.5333	1.3389	0.5353	0.8673	0.5333	0.5333	0.5333	4.7473
1380	gamma-CEHC	Cofactors and vitamins	Tocopherol metabolism	37462	LC/MS Neg	3818	263.3	133098	178167-75-4;		HMDB01931	0.5018	0.995	0.4457	2.4161	0.6737	1.1781	2.2008	2.8189	0.7817	0.4457	1.005	2.3346	2.8285	0.7498	2.3369	0.4457	1.1785	1.1705	0.4457	0.5694	0.8215	0.7584	0.8045	0.4997	1.39	0.4457	0.4457	0.4457	0.4457	0.4457	0.4457	0.4457	0.4457	0.4457	0.4457	0.4457	0.4457	0.4457
475	gamma-glutamylalanine	Peptide	gamma-glutamyl	37063	LC/MS Pos	1108	219	440103	5875-41-2;			2.4967	1.0702	0.4008	0.7711	1.0362	0.9485	1.2821	1.288	1.209	0.6091	1.6673	1.158	1.4107	0.6904	1.3476	0.7302	1.0809	0.9805	0.7014	0.9192	0.8951	1.4602	0.991	1.3939	0.8402	0.7391	1.009	0.4008	0.4008	0.7034	0.4008	1.0172	0.8877	0.4008	0.6761	1.5558	1.2213	0.9638
468	gamma-glutamylglutamine	Peptide	gamma-glutamyl	2730	LC/MS Pos	806	276.1	150914	10148-81-9;		HMDB11738	1.4509	1.8911	0.3992	0.8894	1.1934	0.572	1.0254	1.0402	0.9717	0.5719	1.2415	0.5653	0.925	0.9165	1.2991	0.6646	1.4347	0.6521	0.6028	1.6308	1.665	1.7056	0.6479	1.4218	1.1376	0.4793	1.1414	1.0472	0.4397	0.8234	0.6337	1.0413	0.9105	1.0599	0.9838	3.646	2.3883	0.9292
463	gamma-glutamylisoleucine*	Peptide	gamma-glutamyl	34456	LC/MS Pos	2644	261.2				HMDB11170	0.7512	0.9211	0.8817	0.7415	1.4759	1.5217	0.5843	1.5031	1.8693	0.8776	0.2523	1.4008	0.9235	0.7403	1.3743	0.708	0.2523	1.0361	0.4664	0.2523	1.2305	0.6714	1.4134	0.9534	1.3107	0.873	0.9574	1.2849	1	0.8047	0.2523	0.2523	1.0496	2.1348	1.4986	1.2807	1.2275	0.827
462	gamma-glutamylleucine	Peptide	gamma-glutamyl	18369	LC/MS Pos	2744	261.2	151023	2566-39-4;		HMDB11171	0.7816	1.0082	0.4962	0.9604	1.358	1.4456	1.2832	1.8971	1.7245	0.8573	1.0337	1.8921	2.094	1.4028	1.0605	0.6028	0.506	1.3804	0.4804	0.6442	2.0539	0.9918	1.3594	0.8119	1.3817	0.7242	1.1543	1.5363	0.6619	1.0991	0.7157	0.6869	0.9094	1.4477	0.7115	0.8177	1.8814	0.9581
466	gamma-glutamylmethionine	Peptide	gamma-glutamyl	37539	LC/MS Pos	1993	279.2	7009567	17663-87-5;			0.9116	1.0574	1.1895	0.8766	0.4002	0.4206	1.505	0.6475	1.0736	0.9426	0.4525	0.842	0.6712	0.5116	0.7249	1.6218	1.1807	0.6427	0.6714	1.1392	0.8247	0.865	0.561	1.1409	1.2349	0.4272	0.8739	1.3078	0.2171	0.8876	3.6663	1.422	0.9264	2.0412	3.1402	1.1834	2.6503	2.1165
470	gamma-glutamylphenylalanine	Peptide	gamma-glutamyl	33422	LC/MS Pos	2846	295.1	111299	7432-24-8;		HMDB00594	0.6711	1.0556	0.9617	0.8593	0.414	0.8499	0.8131	0.9528	1.0636	0.662	0.9907	1.3945	0.504	0.6704	0.836	0.3959	0.7498	0.6292	0.6926	0.6929	0.6344	1.0867	0.8049	1.2322	1.3627	1.0488	1.1689	1.6349	0.727	0.6405	1.0093	1.4954	1.2076	1.594	0.6648	1.2462	1.3924	1.0472
471	gamma-glutamyltyrosine	Peptide	gamma-glutamyl	2734	LC/MS Pos	2073	311.2	94340	7432-23-7;			1.1855	1.4623	1.1903	1.3719	0.64	0.9613	1.0659	0.9215	0.934	1.0955	1.0273	1.4575	1.0194	0.6949	0.6014	0.4888	1.5193	0.8277	1.0071	1.0512	0.635	0.9929	0.8213	1.3805	1.2364	0.9422	0.8558	1.1977	0.7391	1.0187	0.9732	1.4335	1.1518	1.2996	0.7757	0.9257	0.9813	1.1432
460	gamma-glutamylvaline	Peptide	gamma-glutamyl	32393	LC/MS Pos	2040	247.2		2746-34-1;		HMDB11172	0.8061	0.8299	0.7056	0.5488	1.0553	1.6291	1.1789	1.5651	1.3481	1.0545	1.2034	1.4745	1.4278	1.4993	1.0988	0.6018	0.457	1.3514	0.3983	0.3001	1	0.7736	1.3412	0.7474	0.9893	0.7495	1.5812	1.6897	0.3001	0.8452	0.9972	0.7416	0.8612	2.1019	0.538	0.9855	1.623	1.2105
1377	gamma-tocopherol	Cofactors and vitamins	Tocopherol metabolism	33420	GC/MS	2264	488.4	14986	54-28-4;	C02483	HMDB01492	0.9927	0.6259	0.3098	4.4444	0.8596	0.2673	0.7861	1.7604	1.1388	2.2329	2.4058	1.4702	0.3545	0.4229	0.5224	0.9038	4.8731	0.3505	1.2512	1.0867	0.6903	1.2633	1.003	2.7048	2.2588	1.4495	1.8239	0.997	1.7888	1.064	0.1987	1.4994	0.7983	0.5836	1.3982	1.2246	0.9683	1.4802
620	gluconate	Carbohydrate	Nucleotide sugars, pentose metabolism	587	GC/MS	1879.4	333	10690	527-07-1;	C00257	HMDB00625	0.8625	0.4636	0.7199	0.7188	0.7876	1.6355	1.3698	1.6015	3.2913	0.3793	1.2811	2.9551	1.7059	0.5366	1.7476	0.6865	0.5168	0.599	0.5228	1.1986	0.5158	0.9657	1.1507	0.9432	0.839	1.0896	0.8026	1.2043	0.7904	0.7565	0.3793	1.0255	1.221	3.4401	0.3793	0.7636	1.5483	3.9929
589	glucose	Carbohydrate	Glycolysis, gluconeogenesis, pyruvate metabolism	20488	GC/MS	1866.8	217.1	79025	50-99-7;	C00031	HMDB00122	1.0694	0.6757	0.494	0.9842	0.6853	1.0376	0.8481	1.065	2.133	0.9977	0.7476	1.0158	0.8207	0.79	1.059	0.5975	0.7309	0.71	0.7684	0.689	0.5684	0.7299	1.3347	0.7385	0.9042	1.1012	1.7466	1.5278	1.1358	1.3743	0.9932	1.2581	1.0993	1.2263	0.8108	1.0241	1.1697	1.6859
607	glucuronate	Carbohydrate	Glycolysis, gluconeogenesis, pyruvate metabolism	15443	GC/MS	1886.5	217	65041	207300-70-7;	C00191	HMDB00127	0.0675	0.0675	0.2305	0.2821	0.1676	0.0675	0.116	0.2789	0.2476	0.1848	0.0675	0.3925	0.1937	0.0675	0.2402	0.2843	0.2761	0.1516	0.4898	0.1876	0.1143	0.0675	0.158	0.1561	0.2504	3.9928	1.6791	2.033	1	1.2533	2.8428	1.5972	2.4156	5.8923	0.7647	1.2353	1.8187	3.9395
39	glutamate	Amino acid	Glutamate metabolism	32322	GC/MS	1836.8	362.2	611	56-86-0;	C00025	HMDB03339	1.2517	0.5623	0.421	0.9031	0.6629	2.3306	1.0369	1.9808	1.3724	2.7518	1.1089	1.2858	3.5854	1.0562	0.6949	1.1525	1.0098	1.0494	1.5208	0.3715	0.9384	0.3745	0.9631	0.8767	0.5492	1.3983	0.2013	1.0584	0.8455	0.9902	0.3642	0.4139	3.6588	0.701	0.8906	1.0876	1.23	0.8698
45	glutamine	Amino acid	Glutamate metabolism	53	LC/MS Pos	684	147.2	5961	56-85-9;	C00064	HMDB00641	1.4143	1.5445	0.5954	1.1358	1.01	1.2082	1.0074	0.9553	0.8712	0.6548	1.2686	1.0561	0.9305	1.0613	1.6454	0.6961	1.103	1.0653	0.8713	1.6551	1.3248	1.4631	0.9937	1.2451	1.2088	0.7603	0.8344	1.0063	0.6279	0.8761	0.5813	0.9092	1.0443	0.6651	0.9693	1.7167	1.8115	0.5705
69	glutarate (pentanedioate)	Amino acid	Lysine metabolism	396	GC/MS	1433.6	261	4418048	110-94-1;	C00489	HMDB00661	0.321	0.321	0.321	0.9878	0.321	0.321	0.321	0.321	0.321	1.0807	2.8093	4.1847	0.321	0.321	5.9801	4.2405	0.321	0.6546	1.4885	0.321	0.7723	0.321	0.5322	0.4601	1.4939	0.321	1.7023	1.7324	0.321	0.321	0.9006	0.321	0.321	0.321	0.8385	0.321	0.4381	0.321
86	glutarylcarnitine (C5)	Amino acid	Lysine metabolism	35439	LC/MS Pos	1565	276.1		102636-82-8;		HMDB13130	0.5443	1.0656	1.8987	1.2829	0.6422	0.3629	0.5683	1.5443	1.1943	1.2478	4.0069	22.9316	0.9393	0.4219	0.6399	4.9886	0.8491	0.6391	0.5632	0.7654	0.4388	0.3786	0.9344	1.0532	1.2945	1.4261	1.5192	1.1728	0.7707	0.7603	2.3758	1.4236	0.9287	7.5564	0.9132	0.3992	1.1089	6.421
585	glycerate	Carbohydrate	Glycolysis, gluconeogenesis, pyruvate metabolism	1572	GC/MS	1360.7	189	752	600-19-1;	C00258	HMDB00139	0.8209	0.5982	1.1392	0.933	1.009	0.6706	0.9598	1.5139	1.3476	1.0327	0.9714	1.1827	1.349	0.7823	0.6898	0.7812	1.0427	0.5593	0.8837	0.991	0.9889	0.4919	0.5713	0.7722	0.9383	1.1274	1.2693	1.229	1.1914	1.1693	1.0286	1.2916	2.0533	0.7393	1.0665	0.729	0.9844	1.4202
959	glycerol	Lipid	Glycerolipid metabolism	15122	GC/MS	1311	205	753	56-81-5;	C00116	HMDB00131	0.9935	0.7477	0.9705	0.8378	0.3256	0.9808	0.7054	0.9168	0.722	2.5009	0.8165	1.0218	0.3749	0.8184	0.7733	1.0181	1.4887	0.5678	0.901	1.9937	0.3049	0.6448	0.6373	1.1982	1.4062	0.7644	2.4479	0.8249	0.8719	1.0065	1.0192	1.3653	0.7369	0.9257	1.416	1.8081	0.6123	1.6864
1436	glycerol 2-phosphate	Xenobiotics	Chemical	27728	GC/MS	1691.8	243	2526	819-83-0;	C02979	HMDB02520	0.3463	1.4473	0.785	1.1737	0.3463	1.1995	2.4195	1.6583	0.913	0.3463	0.7984	0.3463	1.6605	1	1.2772	0.6504	1.9223	0.6726	1.9253	0.9506	1.121	0.7641	1.2581	0.777	1.1216	1.2274	0.3463	0.3463	1	0.8846	0.907	1.4568	1.0723	0.3463	0.5099	0.3463	0.3463	0.8258
961	glycerol 3-phosphate (G3P)	Lipid	Glycerolipid metabolism	15365	GC/MS	1719.7	357.1	754	29849-82-9;	C00093	HMDB00126	0.9941	1.3805	0.4208	2.2064	1.8986	1.311	1.4598	2.105	0.8156	1.8306	1.3006	0.9324	1.1576	0.9675	1.8501	1.2235	1.7404	0.7081	0.958	1.8711	1.0418	1.0325	1.8895	1.144	1.1455	1.0059	0.738	0.6065	0.7633	1.182	0.3321	1.2042	1.3015	0.5131	0.7331	0.4531	0.9856	0.5926
962	glycerophosphorylcholine (GPC)	Lipid	Glycerolipid metabolism	15990	LC/MS Pos	694	258.1	657272	28319-77-9;	C00670	HMDB00086	2.5304	1.1611	0.779	1.2885	2.2597	0.9509	1.4521	1.4524	0.7906	0.8454	1	0.3584	1.5615	1.3875	1.524	2.2966	1.0741	0.8496	1.5296	1.0256	2.3874	0.8649	1.3357	1.2565	0.9744	1.2189	0.1144	0.6209	1.9737	1.545	0.1144	0.1144	0.6735	0.2239	0.455	0.1144	0.3632	0.4528
1	glycine	Amino acid	Glycine, serine and threonine metabolism	32338	GC/MS	1486.9	218.1	5257127750	56-40-6;	C00037	HMDB00123	0.8487	1.2562	0.9392	1.1072	1.0658	0.6181	1.0641	0.9141	0.7644	0.5894	0.6204	0.644	1.0071	0.5505	1.0608	0.6242	1.0033	0.8041	0.8639	1.2772	0.8511	1.1173	0.6583	1.317	1.1297	1.081	0.5291	0.8223	0.4533	0.9967	0.584	1.467	1.4336	0.8877	1.2086	1.4292	1.1082	0.8162
930	glycochenodeoxycholate	Lipid	Bile acid metabolism	32346	LC/MS Pos	5320	450.1		16564-43-5;	C05466	HMDB00637	1.4119	1.432	0.9975	1.8552	0.2035	0.3421	0.2599	0.5355	0.4315	0.3773	1.049	1.0871	0.1302	0.0966	0.1953	0.9129	1.7408	0.3882	1.0211	0.3377	0.0708	1.1531	1.0075	1.6295	0.629	2.3659	0.4013	1.0339	0.2463	1.4046	1.4465	2.1656	1.6465	0.3607	1.0025	2.1021	1.125	1.6586
919	glycocholate	Lipid	Bile acid metabolism	18476	LC/MS Neg	5104	464.4	10140	475-31-0;863-57-0;	C01921	HMDB00138	0.6664	2.2414	0.5748	1.3196	0.136	0.3614	0.1139	0.4729	1.7634	1.2211	0.8144	1.6527	0.1525	0.1136	0.2657	1.1606	1.2956	1.193	0.3889	0.9448	0.059	1.085	1.0095	2.2996	1.0443	3.342	0.0926	0.9667	0.1356	0.517	2.4576	4.0018	1.6778	0.2262	0.9905	4.5746	0.6983	0.9557
948	glycocholenate sulfate*	Lipid	Bile acid metabolism	32599	LC/MS Neg	4763	254.8					0.8596	0.4172	0.9397	0.7581	0.8826	1.0744	0.3196	1.0071	0.8882	0.7087	0.6894	1.0605	1.1309	0.594	0.4133	1.3636	0.5786	0.5236	1.2825	0.6589	0.3758	0.7349	1.0337	0.7332	0.9244	2.8759	2.6046	4.8397	1.9387	1.4804	1.2222	1.0937	3.3023	2.0697	0.4771	2.315	0.8786	28.5718
928	glycodeoxycholate	Lipid	Bile acid metabolism	18477	LC/MS Pos	5341	450.1		360-65-6;	C05464	HMDB00631	0.068	11.4285	0.068	0.068	0.068	0.72	1.1981	1.353	0.6697	1.3883	5.1891	0.068	1	0.234	0.5487	0.068	1.5071	4.8985	0.8019	1.2206	0.068	4.2457	3.5755	0.068	0.6377	0.068	0.7844	0.6974	0.068	0.068	2.2516	0.068	0.068	0.068	0.068	0.068	0.068	0.068
1430	glycolate (hydroxyacetate)	Xenobiotics	Chemical	15737	GC/MS	1119	177	3698251757	79-14-1;	C00160	HMDB00115	0.9902	1.1704	0.7422	1.4706	0.599	0.5829	0.9477	0.8689	1.376	0.7568	0.7385	0.8077	0.3964	0.5504	0.3843	0.8164	2.1758	1.3547	1.5847	1.2546	0.5875	1.1776	0.5879	1.4251	0.86	1.6604	0.8478	0.9696	0.5575	1.0098	0.7124	2.6171	0.7942	1.0645	0.9371	1.1515	0.7778	1.2733
932	glycolithocholate sulfate*	Lipid	Bile acid metabolism	32620	LC/MS Neg	5015	512.3	72222		C11301	HMDB02639	0.3496	2.8896	0.2476	0.3485	3.2433	0.5285	0.9316	1.5121	0.9199	1.1494	2.2485	0.2549	2.6385	0.375	0.173	0.2257	2.6905	1.3028	2.3923	0.522	0.1591	2.7525	2.7461	2.9829	1.6091	0.876	10.4376	0.9052	0.967	1.0129	3.4172	1.1942	1.2114	0.7083	0.2409	0.9458	0.6506	2.1169
950	glycoursodeoxycholate	Lipid	Bile acid metabolism	39379	LC/MS Neg	5018.1	448.4				HMDB00708	3.9481	1.2337	0.3281	5.6148	1	0.8967	0.5826	1.0644	1.0952	1.6708	0.5864	1.028	0.1194	0.7686	4.8446	4.9448	1.2546	0.9485	2.038	0.1344	0.4142	1.213	2.0684	0.4083	2.3051	4.2798	0.5261	1.0515	0.4812	0.7565	87.1466	1.7791	0.7394	1.1647	0.1553	1.6203	0.4332	0.316
311	glycylvaline	Peptide	Dipeptide	18357	LC/MS Pos	1572	175.1	27248076994979	1963-21-9;			0.9811	1	0.8318	0.2943	0.2943	0.5926	0.2943	0.9197	6.2825	3.4013	0.2943	0.2943	2.387	0.2943	0.2943	0.7163	1.2749	0.2943	3.716	0.2943	0.6878	0.2943	0.2943	0.2943	0.8622	0.2943	0.2943	0.2943	0.2943	0.2943	0.2943	0.2943	5.3612	0.9409	0.6739	0.2943	1.0189	0.4283
1224	guanosine	Nucleotide	Purine metabolism, guanine containing	1573	LC/MS Neg	1675	282.1	6802	118-00-3;	C00387	HMDB00133	0.6814	0.6814	0.6814	0.6814	3.0194	0.6814	0.6814	1.0056	0.6814	0.6814	0.6814	0.6814	0.6814	0.6814	3.654	0.6814	0.6814	0.6814	0.6814	0.8005	0.6814	0.6814	0.6814	0.6814	0.6814	0.6814	0.8433	0.6814	0.6814	0.6814	1.116	0.6814	1.0655	0.9279	0.6814	0.6814	0.6814	0.6814
1297	gulono-1,4-lactone	Cofactors and vitamins	Ascorbate and aldarate metabolism	33454	GC/MS	1862	333.1	608	1128-23-0;	C01040	HMDB03466	0.2718	0.2718	0.7571	0.2718	0.2718	1.1594	0.2718	0.7659	1.2267	0.2718	0.2718	1.4784	0.4673	0.2718	0.2718	0.2718	0.2718	0.2718	0.6107	0.6566	0.2718	0.2718	0.3589	0.2718	0.6024	1	0.6536	0.2718	0.2718	0.2718	1.205	1	0.2718	2.8243	0.4861	0.2718	1.2812	2.8817
1313	heme	Cofactors and vitamins	Hemoglobin and porphyrin metabolism	41754	LC/MS Pos	5057	616.2		14875-96-8;	C00032		1.1656	0.2927	0.611	1.2723	0.2927	0.7413	0.8981	0.9754	0.6902	0.2927	0.2927	0.2927	0.6036	0.2927	1.3784	1.7016	1.4101	0.2927	0.2927	1.2069	0.7652	0.9642	1.0064	0.5539	0.8354	0.2927	0.9936	1.5672	0.7536	6.5361	0.2927	0.2927	1.6599	2.2207	0.7976	1.7584	0.6657	3.614
1440	heptaethylene glycol	Xenobiotics	Chemical	38154	LC/MS Pos	2836	327.2	79718	5617-32-3;			0.1685	0.1685	0.1685	0.1685	0.1685	1	0.1685	0.1685	0.1685	0.1685	0.7623	0.2613	0.1685	0.1685	0.1685	0.1685	0.2375	0.9154	0.1685	0.1685	0.1685	0.1685	0.1685	0.1685	0.1685	0.1685	0.1685	8.4579	6.275	0.1685	0.1685	0.1685	0.1685	0.1685	0.1685	0.1685	0.1685	0.1685
688	heptanoate (7:0)	Lipid	Medium chain fatty acid	1644	LC/MS Neg	3695	129.2	8094	111-14-8;	C17714	HMDB00666	1.3158	1.2986	0.7942	1.0101	1.404	1.7106	1.168	1.2658	0.5485	0.9286	2.5126	1.1128	1.3972	1.6892	0.3782	2.8068	1.44	1.6344	1.4067	0.7293	0.7602	1.7454	1.0227	1.4504	1.3536	0.8328	0.8618	0.9834	0.9577	1.1779	0.3161	0.9057	0.6006	0.6537	1.1926	1.0959	0.9899	0.6673
798	hexadecanedioate	Lipid	Fatty acid, dicarboxylate	35678	LC/MS Neg	4650	285.2	10459	505-54-4;		HMDB00672	0.2709	0.6652	0.7262	0.2843	0.0841	0.4299	0.3158	0.1727	0.426	0.0925	0.3308	0.2028	0.1243	0.3291	0.4495	0.1884	0.3401	0.0827	2.0542	0.3896	0.185	0.1726	0.2304	0.4995	1.6	3.1307	3.4874	3.4551	3.6913	1.896	6.3566	0.7694	2.1428	4.0373	1.5845	3.2721	1.1556	1.7273
1441	hexaethylene glycol	Xenobiotics	Chemical	38133	LC/MS Pos	2651	283.2	17472	2615-15-8;			0.1407	0.1407	0.1407	0.1407	0.1407	0.1407	0.1407	0.1407	0.1407	0.1407	0.1407	0.1407	0.1407	0.1407	0.1407	0.1407	0.3566	0.1407	0.1407	0.2151	0.1407	0.1407	0.1407	0.1407	0.1407	0.1407	0.1407	1	4.9318	0.1407	0.1407	0.1407	0.1407	0.9003	0.1407	0.1407	0.1407	0.5588
902	hexanoylcarnitine	Lipid	Carnitine metabolism	32328	LC/MS Pos	3174	260.2	6426853	6920-35-0;	C01585	HMDB00705	0.2949	1.2315	0.8121	0.5522	0.2868	0.5481	0.4088	0.9733	1.0267	0.5899	0.7147	3.4382	0.4435	0.8978	1.7236	0.6384	0.5787	0.663	1.571	0.581	0.3448	0.409	0.6535	0.5615	1.3597	0.8046	1.9681	1.791	1.8261	1.1515	1.4365	0.9765	0.5433	5.4899	1.0235	0.63	0.6599	4.5497
1395	hippurate	Xenobiotics	Benzoate metabolism	15753	LC/MS Neg	2136	178.1	464	495-69-2;	C01586	HMDB00714	0.3217	0.3979	1.6988	1.5986	0.6556	1.578	3.0695	4.5494	0.3159	0.1869	0.9204	2.6997	1.6047	1.0876	42.862	0.5838	0.1708	1.5721	0.2142	7.4683	9.9801	1.0796	9.1012	0.4968	0.2178	6.7858	0.3464	0.1642	0.568	0.7993	5.2333	1.5605	1.4256	1.5922	0.3635	0.5825	1.2007	0.4825
53	histidine	Amino acid	Histidine metabolism	59	LC/MS Neg	757	154.1	7733651426	5934-29-2;	C00135	HMDB00177	0.9084	1.307	0.7703	1.4123	0.7815	0.9402	1.027	0.9948	0.9704	0.8635	1.0777	1.2812	1.0052	1.0817	1.0395	0.7226	1.4353	0.9067	0.6432	1.4538	0.993	1.4702	0.7399	1.234	1.0228	0.8686	0.973	1.26	0.4288	1.0965	0.658	1.4734	1.1309	0.8235	0.9552	0.9438	1.4059	0.6953
392.06	histidyltryptophan	Peptide	Dipeptide	41912	LC/MS Pos	1961	342.2	6539217	23403-90-9;			0.7225	0.9363	1	1.5059	2.702	5.6119	0.8814	6.1505	1.8007	3.8554	3.1795	0.3993	1.108	1.7299	0.3993	1.282	0.9591	1.2225	0.5395	0.8673	0.9877	1.4945	0.6806	0.7501	0.7148	2.4658	0.3993	0.3993	0.3993	0.3993	0.3993	0.3993	0.7468	1.8906	0.3993	0.3993	1.2292	0.7498
1754	homostachydrine*	Xenobiotics	Food component/Plant	33009	LC/MS Pos	1199	158.2	441447	1195-94-4;	C08283		0.5594	2.1027	1.7588	0.894	3.5813	2.8913	0.7635	1.6835	1	1.3931	0.6903	1.8668	1.4741	0.8287	0.6638	0.7253	1.2144	2.0283	1.0435	0.6652	1.8236	0.5606	0.927	0.345	1.3679	0.5314	0.8699	0.9702	0.4046	1.7145	1.7011	1.9384	0.7127	0.7123	0.8641	1.0298	1.7441	1.1786
482	HWESASXX*	Peptide	Polypeptide	32836	LC/MS Pos	3520	471.8					0.3213	0.938	1.7101	0.4904	4.4096	5.7994	1.1028	3.0266	0.3038	0.3038	8.5768	0.3038	0.435	2.1759	0.5447	2.9679	2.332	0.3038	0.8009	0.3038	0.8447	2.7398	0.9699	0.3447	0.6076	1.299	0.6765	0.5019	0.6719	0.7823	1.7266	1.525	0.3038	3.4713	1	0.8852	1.9167	0.3038
1813	hydroxycotinine	Xenobiotics	Tobacco metabolite	38661	LC/MS Pos	1284.7	193.2	10219774	34834-67-8;		HMDB01390	0.3289	0.3289	0.5918	0.3289	2.5379	1.373	0.8661	0.4802	1.42	0.3289	0.3289	0.3289	0.3289	1	1.2495	0.3289	0.3289	0.5822	1.8039	0.3289	1.2322	0.3289	0.3289	0.3289	0.3289	0.7678	0.715	0.3289	0.3289	0.677	2.0576	0.9733	2.1638	0.6266	0.3289	0.3289	0.3289	0.3289
216	hydroxyisovaleroyl carnitine	Amino acid	Valine, leucine and isoleucine metabolism	35433	LC/MS Pos	1683	262.1		99159-87-2;			0.773	0.7397	1.5199	0.9545	2.5761	0.6277	0.6277	1.9141	1.2005	0.6277	0.9276	1.096	0.9764	0.6277	0.6277	0.9064	1.0236	0.6277	0.6277	0.6277	0.6277	0.6675	0.6277	0.6277	0.6277	0.6277	0.6277	2.0438	0.6277	0.6277	2.2003	0.6277	0.6277	0.6277	0.6277	0.6277	0.6277	10.3507
1190	hypoxanthine	Nucleotide	Purine metabolism, (hypo)xanthine/inosine containing	3127	GC/MS	1759.2	265	790	68-94-0;	C00262	HMDB00157	0.6516	1.0123	0.9667	0.6867	0.9249	1.0477	0.7518	1.0664	0.9914	1.5919	0.5935	0.4032	1.4974	0.6297	1.0406	0.3796	0.8858	1.1016	1.822	0.5954	0.693	0.4139	0.6144	1.3427	0.8662	1.6282	0.3237	0.3918	0.7245	1.0843	0.8047	0.5279	6.7029	2.8224	2.5438	0.3483	0.9457	1.0086
1553	ibuprofen	Xenobiotics	Drug	17799	LC/MS Neg	4951	205.1	3672	15687-27-1 ;	C01588,D00126	HMDB01925	0.3372	0.3372	0.3372	0.3372	0.3372	7.8304	0.3372	0.3372	0.3372	0.3372	0.3372	0.3372	0.3372	0.3372	0.4157	0.3372	0.3372	0.3372	0.3372	0.3372	0.3372	0.3372	0.3372	0.3372	0.3372	0.3372	0.3372	0.7408	0.3372	0.3372	0.3372	0.3372	0.8594	0.3372	1	1.1641	3.2476	0.3372
1599	ibuprofen acyl glucuronide	Xenobiotics	Drug	38326	LC/MS Neg	4969	381.2	163959	115075-59-7;			0.9179	0.9179	0.9179	0.9179	0.9179	0.9179	0.9179	0.9179	0.9179	0.9179	0.9179	0.9179	0.9179	0.9179	0.9179	0.9179	0.9179	0.9179	0.9179	0.9179	0.9179	0.9179	0.9179	0.9179	0.9179	0.9179	0.9179	0.9179	0.9179	0.9179	0.9179	0.9179	0.9179	0.9179	0.9179	0.9179	0.9179	0.9179
63	imidazole lactate	Amino acid	Histidine metabolism	15716	GC/MS	1810.3	153	440129	14403-45-3;	C05568	HMDB02320	0.3134	0.3134	0.3134	0.3134	0.3134	0.3134	0.3134	0.3134	0.3134	0.7153	0.3134	0.3134	0.3134	0.3134	0.3335	0.3134	0.3134	0.3134	0.3134	0.9859	0.3134	0.3134	0.3134	0.3134	0.6715	1.013	3.2396	0.3134	0.3134	0.3134	1.5377	0.6562	0.3134	2.7832	0.3134	1	0.666	0.3134
65	imidazole propionate	Amino acid	Histidine metabolism	40730	LC/MS Pos	1011.7	141.1	70630	1074-59-5;		HMDB02271	0.4201	0.4201	0.4628	0.4374	0.4201	0.954	0.4201	0.4201	0.954	0.4201	0.4201	0.4201	1.0404	0.4201	0.5282	0.4201	0.4201	0.4201	0.4201	0.6431	0.4201	0.4201	0.4201	0.4201	0.9596	2.0559	1.3682	0.9179	1.4673	0.5806	1.7534	1.017	1.2556	1.6319	0.4201	0.8827	0.4201	3.4876
156	indoleacetate	Amino acid	Tryptophan metabolism	27513	LC/MS Pos	3760	176.1	802	6505-45-9;	C00954	HMDB00197	1.0812	1.0104	1.1153	1.2297	1.0218	0.6893	0.8562	5.3489	0.5022	0.734	0.8007	1.1463	1.8519	0.9161	0.6199	0.4959	0.902	0.834	0.8336	0.5934	0.6297	0.7721	1.3722	0.7516	1.0751	1.2204	3.6197	0.9081	0.7018	0.9782	1.9859	3.1974	1.4948	2.304	0.9896	0.9217	1.9247	0.5079
154	indolelactate	Amino acid	Tryptophan metabolism	18349	GC/MS	1964.9	202	92904	832-97-3;	C02043	HMDB00671	0.6208	0.6552	1.128	1.1112	0.7686	1.2696	0.6383	1	2.5223	1.1886	0.9127	1.9938	0.8684	0.9338	1	0.4519	0.8389	1.9027	0.129	0.6408	1.28	1.2017	0.8778	0.677	0.4377	1.3688	2.5384	0.6266	0.129	1.6488	2.2255	4.7351	2.4489	3.9918	0.2595	0.2411	1.4259	3.3438
180	indolepropionate	Amino acid	Tryptophan metabolism	32405	LC/MS Neg	2795	188.2	3744	830-96-6 ;		HMDB02302	1.9826	0.9874	0.2891	1.5839	2.7986	1.1974	0.8645	2.6788	0.8208	0.8207	1	3.6761	2.3304	0.8874	6.6437	0.6766	0.3821	3.2208	0.2891	1.5306	1.043	4.3094	1.1412	0.918	0.2891	0.2891	3.2261	0.2891	0.2891	0.2891	0.8139	0.7254	0.2891	0.4085	0.2891	0.2891	0.2891	0.2891
1192	inosine	Nucleotide	Purine metabolism, (hypo)xanthine/inosine containing	1123	LC/MS Neg	1600	267.2		58-63-9;	C00294		0.3276	0.5858	0.3252	0.799	6.3933	0.4271	0.4924	2.0775	0.6317	2.6303	0.3071	0.3071	0.5232	0.9512	4.8517	0.7657	0.5556	1.0488	0.6386	1.2023	0.6128	0.3625	0.6948	1	0.7795	2.9066	1.5898	0.6702	2.5891	0.4238	2.1625	0.4763	86.8429	4.9786	6.1385	0.8985	0.892	0.7175
974	inositol 1-phosphate (I1P)	Lipid	Inositol metabolism	1481	GC/MS	2057.8	318.1		106032-59-1;	C04006	HMDB00213	0.6714	0.5132	0.4737	1.525	1.0034	0.6483	0.7753	1.3981	1.055	2.0231	1.0802	1.0064	0.5992	0.3118	1.1375	0.9966	1.678	0.5992	0.8268	1.5259	0.9426	0.5659	1.0879	1.0063	0.4409	0.7814	0.9966	1.0127	0.9948	0.7255	0.4803	1.992	1.5094	0.8796	1.0034	1.2104	1.2567	1.3068
210	isobutyrylcarnitine	Amino acid	Valine, leucine and isoleucine metabolism	33441	LC/MS Pos	1941	232.2		25518-49-4;			0.3303	0.6355	0.8411	0.9915	2.1451	0.5131	2.7708	4.9653	1.4707	0.4993	1.0624	6.4663	4.5364	2.8147	3.3474	1	0.4378	1.2745	0.3303	0.6251	1.7162	0.7613	0.9376	0.4042	0.6891	0.804	1.2937	0.6829	0.4589	0.5602	2.1866	1.8697	0.7112	10.4062	0.3303	0.3303	0.765	33.0317
190	isoleucine	Amino acid	Valine, leucine and isoleucine metabolism	1125	LC/MS Pos	1614	132.1	791	73-32-5;	C00407	HMDB00172	0.8085	1.3512	0.7144	1.0493	1.0986	1.5726	2.0611	1.1934	1.49	1.1368	0.9185	1.148	1.5157	1.4765	1.192	0.653	0.5775	1.5288	0.8164	0.6629	1.2536	1.583	0.8239	1.131	0.9425	0.5182	1.0827	1.5884	1.195	0.9507	0.4873	1.2586	0.6279	1.2704	1.0163	0.8022	1.2023	0.9308
894	isovalerate	Lipid	Fatty acid metabolism	34732	LC/MS Neg	1623	101.2	10430	503-74-2;	C08262	HMDB00718	0.7268	1.6739	0.5713	1.41	1.0033	1.6147	2.2842	2.2868	1.2283	1.2201	1.5455	1.1457	1.7465	1.7975	0.777	1.1437	1.0757	1.4992	0.9404	1.3486	2.0226	1.9884	1.1731	0.9525	0.8185	0.7605	1.6445	0.8662	0.8136	1.0698	0.7285	0.5184	0.8138	1.0736	0.8058	0.4478	0.6363	0.9272
215	isovalerylcarnitine	Amino acid	Valine, leucine and isoleucine metabolism	34407	LC/MS Pos	2533	246.2	6426851			HMDB00688	0.5412	0.9525	0.3948	1.4046	1.0617	0.9924	2.4809	2.0849	1.3839	1.1383	1.0076	6.6007	3.0504	1.9265	0.8344	0.843	0.6329	1.8969	0.366	0.6452	0.9383	0.8733	0.9314	0.6477	0.7767	0.9142	1.3869	1.3446	0.297	1.2901	1.909	1.6272	0.7036	2.8409	0.6447	0.2101	0.6427	4.1783
151	kynurenate	Amino acid	Tryptophan metabolism	1417	LC/MS Neg	2243	188.1	3845	492-27-3;	C01717	HMDB00715	0.3329	0.5815	1	0.5915	0.4258	0.3329	0.3329	0.8609	0.9029	0.4778	0.3329	2.2132	0.6214	0.5699	0.3329	0.3329	0.3329	0.3329	0.7336	1.1394	0.3329	0.3329	0.3329	0.6086	1.1828	1.0971	1.3258	1.0881	0.6538	0.6938	1.4615	2.8435	1.1583	15.2477	0.3329	0.4078	1.7328	1.8558
152	kynurenine	Amino acid	Tryptophan metabolism	15140	LC/MS Pos	1902	209.1	1611666971029	2922-83-0;	C00328	HMDB00684	0.6767	1.1212	1.3371	1.1336	0.9777	1.9404	0.9898	1.2497	1.0914	0.6591	1.0102	2.32	1.0268	0.8699	0.5367	0.4122	1.1592	0.9647	0.7987	0.632	0.7254	0.8111	0.9389	0.7373	0.8138	1.3217	1.8098	1.5296	0.3686	1.0223	3.4525	4.6262	0.8689	5.2669	0.6076	0.7924	1.2399	0.7549
1314	L-urobilin	Cofactors and vitamins	Hemoglobin and porphyrin metabolism	40173	LC/MS Pos	4091	595.4	5280818	34217-90-8;	C05793	HMDB04159	0.0841	9.8566	0.0841	0.0841	0.1757	0.0841	1	2.1623	0.0841	0.0841	1.0795	0.0841	0.0841	0.0841	0.0841	0.0841	0.0841	0.2876	0.4478	0.0841	0.0841	0.0841	0.0841	0.203	0.0841	0.0841	161.071	0.0841	8.7984	0.0841	0.0841	0.0841	0.0841	0.0841	0.0841	0.2923	0.0841	0.0841
604	lactate	Carbohydrate	Glycolysis, gluconeogenesis, pyruvate metabolism	527	GC/MS	1102.8	116.9	612	79-33-4;	C00186	HMDB00190	1.2876	0.9263	0.4937	0.7507	0.8488	0.7247	0.9948	1.3879	1.3165	1.2163	0.5658	0.5612	1.1629	0.4911	1.2539	0.5617	1.111	0.7753	1.356	0.753	0.653	0.5321	0.8494	1.3545	0.8703	1.5501	1.1492	0.6522	0.715	0.8777	0.9712	0.6862	1.5051	0.7973	1.0106	1.0052	1.7331	1.3414
1100	lathosterol	Lipid	Sterol/Steroid	39864	GC/MS	2337	255.2	65728	80-99-9 ;	C01189	HMDB01170	0.5027	0.5027	0.5027	0.5027	2.0355	1.7727	0.9708	0.5027	0.5027	0.5027	0.5027	0.5027	1.2329	0.5027	1.247	0.5027	0.5027	0.9329	0.9396	0.5027	0.6416	0.5027	0.5027	0.5027	0.5027	1.1066	0.5027	0.5027	0.5027	0.5027	0.5027	0.5027	0.6823	0.5027	0.5027	0.5027	0.965	0.5027
694	laurate (12:0)	Lipid	Medium chain fatty acid	1645	LC/MS Neg	5288	199.3	3893	143-07-7;	C02679	HMDB00638	1.2954	1.2168	1.1359	0.9854	0.6727	1.9919	0.819	1.2272	1.1882	1.0682	0.671	0.8304	0.7111	1.1568	0.771	0.9279	0.8218	0.9196	1.7804	1.9447	0.9331	0.6621	0.6162	1.8858	1.7491	0.6327	1.6566	1.74	1.0061	1.244	0.9255	1.071	0.3429	1.0132	1.3041	1.5498	0.637	1.5317
909	laurylcarnitine	Lipid	Carnitine metabolism	34534	LC/MS Pos	5066	344.3	10427569			HMDB02250	0.5584	1.4063	0.9766	0.9403	0.5656	0.1503	0.548	0.9971	0.8349	0.3913	0.4858	12.3404	0.8156	0.3502	0.4775	0.2997	1.4523	0.2414	1.0364	0.9194	0.9756	0.3536	1.2	0.8176	1.6616	2.9506	1.0234	1.3468	0.7123	0.9599	1.7793	1.2439	1.6275	1.3078	0.903	1.2502	2.3149	7.3774
191	leucine	Amino acid	Valine, leucine and isoleucine metabolism	60	LC/MS Pos	1674	132.2	70457986106	61-90-5;	C00123	HMDB00687	0.9356	1.2176	0.6099	1.0986	0.9837	1.3901	1.8054	1.3148	1.5393	0.9844	1.0156	1.0592	1.7608	1.4976	0.829	0.9132	0.7185	1.6039	0.8152	0.7902	1.4422	1.2356	1.1248	1.1757	0.9123	0.7618	0.964	1.5745	0.891	1.2575	0.6173	1.0528	0.6794	1.308	0.9226	0.5275	1.152	1.0163
413	leucylalanine	Peptide	Dipeptide	40010	LC/MS Pos	1760	203.2	259321	7298-84-2;			3.9678	2.6439	2.001	1.9134	0.8404	2.686	2.6729	0.9714	1.0286	1.5923	0.912	0.909	1.6028	1	0.451	2.5163	2.543	1.0306	1.7641	1.0765	2.4464	1.3547	1.9452	1.6796	2.1189	1.8832	0.7115	0.4443	0.3306	0.4211	0.4311	0.8218	0.358	0.1851	0.8872	1.1032	1.8046	0.2866
360	leucylleucine	Peptide	Dipeptide	36756	LC/MS Pos	3012	245.1	768076992072	3303-31-9;	C11332		0.7757	0.9115	0.5724	1.8673	1.8125	6.9329	1.3854	4.1048	0.7698	0.5238	2.8314	0.5238	1.0303	3.5935	0.6024	1.3002	0.9822	1.0885	0.6611	0.6506	1	1.1402	0.795	0.5238	0.8924	0.5238	0.5238	0.5238	0.5238	0.5238	0.5238	1.2355	0.5238	1.944	0.5238	0.5238	0.8779	0.5238
1568	lidocaine	Xenobiotics	Drug	35661	LC/MS Pos	2761	235.2	3676	137-58-6;	D00358		0.9502	0.4611	0.4611	1.172	1.5162	0.7159	0.4611	0.6664	0.9215	0.4611	0.4611	3.2559	0.884	0.4839	1.5808	0.7154	0.4611	0.4847	0.7816	0.9092	0.9492	0.4611	0.9126	0.4698	0.4611	1.9715	1	0.8536	4.1857	0.9295	5.9838	10.9642	0.7891	1.4159	3.6192	0.569	1.0439	1.7763
673	linoleate (18:2n6)	Lipid	Essential fatty acid	1105	LC/MS Neg	5533	279.3	5280450	60-33-3;	C01595	HMDB00673	0.9812	1.1949	0.7625	0.8492	0.244	0.6673	0.9368	1.1191	1.3471	1.169	0.7415	0.5627	0.6761	1.2265	0.9366	0.7658	0.8274	0.8143	1.3732	2.1488	0.5676	0.6838	0.4152	1.5562	1.7541	0.3905	1.1695	1.0765	1.47	0.9017	1.0048	0.808	0.4494	2.0226	1.4435	1.3681	0.7049	1.3995
677	linolenate [alpha or gamma; (18:3n3 or 6)]	Lipid	Essential fatty acid	34035	LC/MS Neg	5450	277.3			C06427	HMDB01388	1.0722	1.0175	0.6082	0.7476	0.0765	0.3266	1.1218	1.1326	1.7544	1.1539	0.4366	0.3835	0.5082	1.3758	0.9155	0.7326	0.5032	0.4949	1.1936	2.3035	0.4368	0.6182	0.2234	1.8434	1.6836	0.2527	1.1275	1.0874	1.5293	0.6321	1.0735	0.5839	0.3051	1.5536	1.291	1.4609	0.5538	1.6864
75	lysine	Amino acid	Lysine metabolism	35839	GC/MS	1984	174.1	5962	56-87-1;	C00047	HMDB00182	1.0627	0.859	0.5264	1.0326	0.9491	0.7187	0.9583	0.4783	1.3415	0.7633	1.0034	0.3176	0.7547	0.6773	0.753	0.6654	0.589	1.166	1.004	1.2577	1.1411	0.4192	0.7039	1.3246	0.7596	0.6676	1.2983	1.6382	0.9674	0.963	1.2594	0.9966	0.5123	1.5285	1.009	1.6102	1.0761	1.4612
667	malate	Energy	Krebs cycle	1303	GC/MS	1502	233	525	6915-15-7;	C00149	HMDB00156	1.0645	0.3721	0.6931	0.6334	0.3617	0.3484	1.0919	1.5329	1.8674	1.077	0.8601	0.6656	0.7347	0.345	0.745	0.5884	0.7983	0.5152	0.8651	1.2453	0.5316	0.6117	1.018	1.2017	0.9355	1.2625	1.6232	0.9936	0.6605	1.5282	1.139	1.5338	1.6541	0.8562	1.0088	1.7857	2.005	0.9217
548	mannitol	Carbohydrate	Fructose, mannose, galactose, starch, and sucrose metabolism	15335	GC/MS	1839	319.1	6251	69-65-8;	C00392	HMDB00765	0.275	0.2561	0.8469	9.5177	0.3415	0.8367	0.2953	0.9135	106.288	0.6534	0.6694	3.8047	0.782	1.2291	2.9263	0.5701	0.4952	2.873	0.2939	1.0865	0.7511	0.6287	1.5853	0.6121	0.6503	4.1015	17.9539	1	0.2561	0.3066	1.6102	1.7969	36.911	38.6249	0.2561	0.4256	12.556	92.9978
552	mannose	Carbohydrate	Fructose, mannose, galactose, starch, and sucrose metabolism	584	GC/MS	1753.5	203.9	161658	3458-28-4;	C00159	HMDB00169	0.822	0.6667	0.3589	0.793	0.8789	0.9476	0.3656	1.9999	2.9893	0.8306	0.6313	1.4107	0.7038	0.6924	1.1738	0.7025	0.6371	0.7371	1.1128	0.6759	0.7507	0.5212	1.1926	0.6919	1.0731	1.5337	1.7533	1.9954	2.3434	2.064	1.205	1.1592	0.8554	2.3764	1.1089	0.8843	1.4221	3.1645
237	methionine	Amino acid	Cysteine, methionine, SAM, taurine metabolism	1302	LC/MS Pos	1252	150.1	69920876137	63-68-3;	C00073	HMDB00696	0.7089	1.3438	1.0296	1.2568	0.5093	0.5721	1.0054	0.6791	1.0202	0.8257	0.6312	0.825	0.5543	0.6011	0.6853	2.6912	1.1626	0.7375	0.7961	0.9976	0.6737	1.2218	0.5255	1.3124	0.7795	0.8166	0.8434	1.3836	0.5061	0.9162	6.7237	2.1904	1.3668	1.9864	4.4306	0.9946	2.4156	3.2906
1294	methylphosphate	Nucleotide	Purine and pyrimidine metabolism	37070	GC/MS	1221	240.9	13130	7023-27-0;			1.4195	1.2674	0.9979	1.6068	1.2318	0.4633	1.3311	0.6745	0.8875	1.8836	0.8118	1.4154	1.2489	1.0021	1.4416	0.8112	1.1722	0.4898	1.5075	0.4373	1	1.3586	0.4825	0.644	0.1385	0.8061	0.6235	0.6502	0.6623	1.0909	1.2053	0.9027	1.2824	0.1385	0.8035	1.4555	1.0415	0.1385
1571	metoprolol	Xenobiotics	Drug	18037	LC/MS Pos	3205	268.2	4171	56392-17-7;	C07202,D02358	HMDB01932	0.0793	0.0793	0.0793	0.0793	0.0793	0.0793	0.0793	0.6374	0.0793	1	0.0793	1.3626	0.0793	0.0793	0.0793	2.3562	0.0793	0.0793	0.0793	0.0793	0.0793	0.0793	0.0793	0.0793	0.0793	0.0793	0.0793	0.0793	0.0793	0.0793	0.0793	0.0793	0.0793	0.0793	0.0793	0.0793	0.0793	0.088
1572	metoprolol acid metabolite*	Xenobiotics	Drug	34109	LC/MS Pos	2535	268.2	62936				0.1618	0.5285	0.1618	0.1618	0.1618	0.1618	0.1618	1.4774	0.1618	8.5588	0.1618	2.8143	0.1618	0.1618	0.1618	0.5226	0.1618	0.1618	0.1618	0.1618	0.1618	0.1618	0.1618	0.1618	0.1618	0.1618	0.1618	0.1618	0.1618	0.1618	0.1618	0.1618	0.1618	0.1618	0.3107	0.1618	0.1618	0.2121
971	myo-inositol	Lipid	Inositol metabolism	19934	GC/MS	1924.9	217		87-89-8;	C00137	HMDB00211	0.5866	0.5367	1.2037	1.0166	0.7881	1.023	0.902	1.7499	1.3125	1.2154	1.3198	5.3076	1.044	0.9348	0.7606	0.8061	0.7415	0.977	0.63	0.7557	0.672	0.8642	0.7353	0.9834	1.3338	0.6056	1.597	0.4027	0.2442	0.7063	1.1486	2.0705	1.4161	1.4827	0.8054	1.3822	1.8895	1.9321
698	myristate (14:0)	Lipid	Long chain fatty acid	1365	LC/MS Neg	5439	227.3	11005	544-63-8;	C06424	HMDB00806	0.9135	1.0004	0.7948	0.6207	0.2641	0.9545	0.3686	1.0865	1.1322	1.6192	0.9094	0.5605	0.6632	1.2101	0.6171	0.7863	0.6459	0.6369	1.598	1.8812	0.4942	0.3822	0.3939	1.4372	1.9082	0.3934	1.335	1.5164	1.102	1.1736	1.1453	0.7397	0.3129	1.9814	1.0465	1.3449	0.4693	1.2937
699	myristoleate (14:1n5)	Lipid	Long chain fatty acid	32418	LC/MS Neg	5338	225.3	5281119	544-64-9 ;	C08322	HMDB02000	1.0746	1.0138	0.7624	0.149	0.0721	0.5421	0.0964	0.4786	0.6431	1.2712	0.3159	0.6357	0.2466	0.9862	0.4368	0.6566	0.4492	0.339	1.8991	2.5959	0.1724	0.189	0.1927	1.8046	2.7011	0.3013	2.3479	1.9597	1.6489	1.7997	1.6698	0.2722	0.094	1.6194	1.4101	1.3525	0.2329	1.6945
1733	N-(2-furoyl)glycine	Xenobiotics	Food component/Plant	31536	LC/MS Neg	1513	168.1	21863	5657-19-2;5657-19-2 ;		HMDB00439	0.1704	0.1704	0.3401	0.1704	8.4487	2.8484	1.3018	0.9627	1.5754	0.3883	1.1047	2.2726	0.6814	0.1704	1	0.4423	0.866	2.3366	0.1704	0.1704	1.1232	0.5979	0.2545	0.1704	0.1704	0.2938	0.5375	0.5726	0.6577	0.5251	0.1704	1.1245	0.1704	4.406	0.1704	0.1704	0.1704	2.4085
31	N-acetyl-beta-alanine	Amino acid	Alanine and aspartate metabolism	37432	LC/MS Pos	1460	132.1	76406	3025-95-4;	C01073		0.4908	0.6399	1.4486	1.0036	0.5264	1.2126	0.9516	0.8133	0.5654	0.8448	1.3193	1.9247	0.6386	0.5809	1.4279	1.1653	0.5983	0.674	0.8764	0.3802	0.7424	0.3802	0.7214	0.5755	2.6114	1.0653	0.7585	3.002	0.9964	1.0927	1.5031	1.2961	1.6328	2.1161	1.3055	1	1.5276	0.8181
33	N-acetylalanine	Amino acid	Alanine and aspartate metabolism	1585	LC/MS Neg	882	130.1	88064	97-69-8;	C02847	HMDB00766	0.6788	0.685	0.9411	0.5646	0.6943	0.8095	0.8157	0.9141	1.0218	0.9554	0.526	1.1866	0.9312	0.6028	0.7817	1.0889	0.6454	0.6502	0.8495	0.4088	0.5754	0.6661	0.8874	0.622	1.1884	1.0014	1.7483	1.1854	0.8112	1.0012	1.102	1.2833	1.3468	2.8166	1.0446	1.1407	1.3245	1.1194
511	N-acetylglucosamine	Carbohydrate	Aminosugars metabolism	15095	GC/MS	1903.3	245	24139	7512-17-6;	C00140	HMDB00215	0.4558	0.4558	0.4558	0.4558	0.4558	0.4558	0.4558	0.9945	0.4558	0.4558	0.4558	0.7723	0.4558	0.4558	0.4558	0.4558	0.4558	0.4558	0.4558	0.4558	0.4558	0.4558	0.4558	0.4558	0.4558	0.4558	0.4558	0.995	1.1166	0.4558	0.4558	0.4558	0.8249	2.839	0.9653	0.6291	1.0055	1.0722
4	N-acetylglycine	Amino acid	Glycine, serine and threonine metabolism	27710	GC/MS	1396.4	143.9	10972	543-24-8;		HMDB00532	0.4045	0.8284	1.1518	0.867	1.2227	0.512	0.7409	0.6126	2.3623	1.3766	0.6018	0.731	0.7615	2.1808	0.8829	0.4045	0.8799	0.7559	0.4045	0.7659	1	0.4045	0.4262	0.8055	1.1476	1.0755	3.1942	2.8227	1.8242	0.9412	1.0441	0.9882	1.7003	2.5219	0.9276	1.0118	2.74	1.0842
239	N-acetylmethionine	Amino acid	Cysteine, methionine, SAM, taurine metabolism	1589	LC/MS Neg	1805	190.1	448580	65-82-7;	C02712	HMDB11745	0.6284	0.4637	1.258	0.7319	1.0513	0.4637	0.9914	0.5315	0.8399	0.4637	0.8354	1.618	1.184	0.5554	0.9732	0.4651	0.6052	1.0086	0.9381	0.4637	0.4637	0.982	0.8425	0.8227	1.483	1.5113	1.6482	0.4637	1.2797	0.9823	1.6329	1.2572	1.2348	3.3121	0.6196	0.8175	1.3301	0.8438
517	N-acetylneuraminate	Carbohydrate	Aminosugars metabolism	1592	GC/MS	2074.9	245		131-48-6;	C00270	HMDB00230	0.7168	0.6868	0.908	0.6862	0.9908	0.6589	0.7149	1.5227	0.9946	1.0489	0.3914	2.593	1.2534	1	0.885	0.3914	0.3914	0.5888	0.8418	0.3977	0.5818	0.6685	0.9161	0.5296	1.1811	0.9449	1.4535	1.0825	1.171	0.7078	3.8948	0.7338	2.4423	5.6799	1.4078	0.9888	1.9944	3.0421
264	N-acetylornithine	Amino acid	Urea cycle; arginine-, proline-, metabolism	15630	LC/MS Pos	875	175.2	6992102439232	6205-08-9;	C00437	HMDB03357	0.5646	0.3624	2.4639	1.8433	1.2494	0.3543	0.8857	1.1205	2.237	1.9081	0.8359	3.1018	0.8271	0.528	1.2687	0.6664	0.7157	0.9899	0.6495	0.7726	0.8263	1.0511	1.7597	0.4844	2.0491	0.7026	1.1102	2.3564	0.5854	0.5578	0.5126	1.0602	0.9364	1.0636	0.7115	0.336	1.3238	2.0903
131	N-acetylphenylalanine	Amino acid	Phenylalanine & tyrosine metabolism	33950	LC/MS Neg	2590	206.2	74839	2018-61-3;	C03519	HMDB00512	0.4959	0.4959	0.7554	0.4959	1	1	0.4959	0.4959	1.1761	1.0651	1.0148	1.7572	0.6139	0.4959	0.4959	0.4959	0.4959	0.6093	0.4959	0.6401	0.7559	0.4959	0.4959	0.6109	0.7454	1.0445	0.4959	0.8905	1.0524	0.8601	0.8663	1.1468	1.0468	3.6302	0.4959	0.4959	1.1347	1.1043
10	N-acetylserine	Amino acid	Glycine, serine and threonine metabolism	37076	GC/MS	1526	218	65249	97-14-3;		HMDB02931	0.4659	0.5022	1.0881	0.906	0.7555	0.6768	0.6823	1.016	0.8747	0.6563	0.8523	1.8047	0.8023	0.5922	0.7068	0.4659	0.7927	0.4659	0.4659	0.6718	0.597	1.0678	0.7558	0.5999	1.5087	1.6662	1.8661	1.1548	0.8994	0.9346	1.0069	1.2669	2.9869	4.1157	0.9931	0.9235	2.5577	2.0262
18	N-acetylthreonine	Amino acid	Glycine, serine and threonine metabolism	33939	LC/MS Neg	846	160.1	4651717		C01118		0.5241	0.8843	1.6153	0.4817	0.8283	0.4817	0.5287	1.5036	0.4817	1.4558	0.6054	2.6885	0.9077	0.7126	0.9762	0.6566	0.4817	0.4817	0.7885	0.4817	0.4817	0.8128	0.5893	0.5682	1.4379	1.2854	1.6759	0.4817	0.911	0.6987	0.4817	1.4526	1.1653	3.1184	0.6987	1	1.922	2.0712
170	N-acetyltryptophan	Amino acid	Tryptophan metabolism	33959	LC/MS Neg	2650	245.2	700653	1218-34-4;	C03137		0.1765	0.1765	0.1765	0.1765	0.1765	0.8372	0.1765	0.1765	0.1765	0.9655	0.1765	1	0.1765	0.1765	0.1765	0.1765	0.1765	0.6793	0.1765	0.1765	0.1765	0.1765	0.1765	0.1765	0.1765	0.1765	1	0.1765	0.1765	0.361	235.392	378.446	11.3999	794.513	0.1765	0.1765	0.1765	0.6013
759	n-Butyl Oleate	Lipid	Fatty acid, ester	36802	GC/MS	2045	265.3	5354342	142-77-8;			1.3944	1.1065	0.3151	0.2369	1.7727	1.3511	0.2369	1.219	0.8137	0.8288	1.3375	0.2369	0.9231	0.6762	0.2369	0.2369	1.863	0.6371	0.8613	0.2369	0.2369	1.3818	1.0066	0.2369	0.2369	0.2369	1.494	1.7243	1.005	0.936	0.2369	0.9356	0.2369	0.2369	1.554	1.1443	0.2369	0.6489
231	N-formylmethionine	Amino acid	Cysteine, methionine, SAM, taurine metabolism	2829	LC/MS Neg	1541	176.1	439750	4289-98-9;	C03145	HMDB01015	0.791	0.9205	1.4766	1.0683	0.754	0.8788	0.5477	1.0966	0.7797	0.6369	0.6207	1.7674	0.9226	0.9974	0.9173	0.8142	0.8795	0.5335	0.8289	0.8228	0.5944	0.4446	0.9987	0.8831	1.8988	1.1301	2.3299	1.0013	0.9504	0.8739	1.6339	2.1307	1.6017	2.9756	1.0789	0.9639	2.5662	1.0496
266	N-methyl proline	Amino acid	Urea cycle; arginine-, proline-, metabolism	37431	LC/MS Pos	833	130.1	557	475-11-6;			7.0656	0.7838	2.4056	2.2556	0.2472	0.7488	1.0022	0.1649	8.3987	0.1649	5.5026	2.8767	0.2784	2.2453	0.3276	0.4159	1.5802	0.8241	0.5431	4.6145	0.2985	0.6556	0.9978	0.1649	0.3434	0.5799	0.5362	1.2151	0.1649	0.2687	0.4426	2.6469	0.4557	1.2236	0.1649	1.2579	3.7145	0.1649
1844	N-methylhydantoin	Xenobiotics	Bacterial	40006	GC/MS	1358.7	171	69217	616-04-6;	C02565	HMDB03646	0.1928	0.1928	0.1928	1.9175	0.1928	0.1928	0.1928	0.1928	1.1739	0.1928	0.1928	0.1928	0.1928	0.1928	1	3.0043	1.0118	0.1928	0.1928	0.1928	0.1928	0.9446	0.1928	0.1928	0.9594	0.1928	1.245	0.1928	1.0292	0.9856	0.1928	1.1062	0.1928	0.1928	0.1928	0.3967	1.3706	0.1928
1346	N1-Methyl-2-pyridone-5-carboxamide	Cofactors and vitamins	Nicotinate and nicotinamide metabolism	40469	LC/MS Pos	1707.3	153.2	69698	701-44-0;	C05842	HMDB04193	0.2747	0.6465	2.0577	0.311	1.4074	0.7026	1.0448	1.0036	1.1386	0.6067	1.3118	4.843	1.4699	0.9329	0.4188	0.4065	0.8269	1.0414	0.3948	0.2059	0.3436	0.2578	0.3596	0.5425	1.0046	0.7853	1.1537	0.3275	0.6381	0.7207	3.0497	1.5385	1.3057	1.5876	0.7772	1.6751	2.7636	4.9579
1201	N1-methyladenosine	Nucleotide	Purine metabolism, adenine containing	15650	LC/MS Pos	1356	282.1	5460178	15763-06-1;	C02494	HMDB03331	0.8017	0.8518	0.9284	0.7917	1.0306	0.9863	0.7351	0.6166	1.0442	0.7444	0.8167	1.299	0.7357	0.7069	0.7909	0.6069	0.6862	1.0203	0.7763	0.7318	0.5707	0.9128	0.9294	0.6625	1.0391	0.9251	1.5647	1.3793	1.1678	0.9629	1.0137	1.4403	1.0611	1.6545	0.801	1.5301	1.4981	1.2406
1239	N2,N2-dimethylguanosine	Nucleotide	Purine metabolism, guanine containing	35137	LC/MS Pos	2157	312.1	92919	2140-67-2;		HMDB04824	0.7455	0.7527	1.7653	1.4814	0.9906	1.4863	0.8368	0.689	0.7512	0.6682	0.9454	1.2358	1.0519	0.6692	0.7137	1	0.7574	0.6569	0.8773	0.5294	0.5294	0.5294	0.9683	0.9514	1.7698	1.1631	1.518	0.8984	0.9583	0.7968	1.0965	1.785	0.9638	4.3808	1.0226	1.2198	1.8999	1.9802
1254	N4-acetylcytidine	Nucleotide	Pyrimidine metabolism, cytidine containing	35130	LC/MS Pos	2030	286.1	107461	3768-18-1;		HMDB05923	0.3804	0.7531	0.9058	0.3804	0.3804	0.7602	0.4623	0.3804	0.4403	0.3804	0.3804	1.5001	0.3804	0.3804	0.3804	0.3804	0.3804	0.3804	0.4948	0.3804	0.3804	0.3804	1.1391	0.3804	0.3804	1.1446	1.3921	0.8874	0.3804	0.3804	2.5787	0.8613	0.3804	0.3804	0.3804	2.3847	1.8706	1
85	N6-acetyllysine	Amino acid	Lysine metabolism	36752	LC/MS Pos	1134	189.1	699197892832	692-04-6;	C02727	HMDB00206	0.5914	0.565	0.9248	1.0224	0.9776	1.1119	0.9952	0.7521	1.4686	0.8261	0.9902	1.9685	0.9035	0.5573	0.6888	0.6007	0.761	0.7248	0.4908	0.5924	0.8899	0.8701	0.8018	0.5165	1.6766	1.3463	1.1396	1.2151	1.0982	0.8576	1.1849	1.3585	1.4159	1.9101	0.6307	1.1901	1.8707	1.6525
1242	N6-carbamoylthreonyladenosine	Nucleotide	Purine metabolism, guanine containing	35157	LC/MS Pos	2656	413		24719-82-2;			0.627	0.3594	1.1822	0.9228	0.3594	0.3594	0.3594	1.1898	0.9496	0.6102	0.3594	2.3286	0.8248	0.464	0.4473	0.3594	0.6518	0.4719	0.4143	0.4784	0.3594	0.3594	0.3594	0.6554	1.427	1.772	1.4301	0.5456	0.9443	0.647	0.9814	1	1.5158	5.4551	0.6724	1.0862	1.9293	3.0646
1565	naproxen	Xenobiotics	Drug	12122	LC/MS Neg	4168	228.9	156391	22204-53-1;	C01517	HMDB01923	0.0421	0.0421	0.0421	1.9579	0.0421	0.0421	0.0421	0.0421	0.0421	0.0421	1	0.0421	0.0421	0.0421	0.0421	0.0421	0.0421	0.0421	0.0421	0.0421	0.0421	0.0421	0.0421	0.0421	0.0421	0.0421	0.0421	0.0421	0.0421	0.0421	0.0421	0.0421	0.0421	0.0421	0.0421	0.0421	0.0421	0.0421
1324	nicotinamide	Cofactors and vitamins	Nicotinate and nicotinamide metabolism	594	LC/MS Pos	1267	123.1	936	98-92-0;	C00153	HMDB01406	0.585	0.8719	0.4278	0.7419	0.5439	0.8548	0.5543	1.2912	1.3051	1.3672	0.9195	0.6672	0.6535	0.4977	0.8991	0.3171	1.1146	1.7295	1.1904	1.0028	1.5589	0.733	1.8418	0.6395	0.7636	0.4995	0.8611	0.594	0.7589	0.9972	0.923	1.7495	1.688	1.3051	1.0743	2.4032	2.4923	1.5393
799	octadecanedioate	Lipid	Fatty acid, dicarboxylate	36754	LC/MS Neg	5033	313.3	70095	871-70-5;		HMDB00782	0.382	0.5566	0.2946	0.4523	0.4412	0.2753	2.1546	0.2496	0.6306	0.0821	0.2168	0.2189	0.2976	0.188	0.4318	0.1734	1.0494	0.1921	3.9977	0.3757	0.3357	0.3514	0.2648	0.9223	2.9468	1.3059	1.5322	2.3373	6.8473	1.2019	3.963	0.5286	0.9506	4.9813	2.0446	2.6856	0.5735	2.2408
1442	octaethylene glycol	Xenobiotics	Chemical	42361	LC/MS Pos	3054	388.2	78798	5117-19-1;			0.4775	0.5073	1.2136	0.4336	0.4961	0.7347	0.5713	0.82	2.227	0.7566	0.9195	1.2753	0.5171	0.537	5.1541	0.4875	1.4046	2.6954	0.6589	1.6251	1.2747	1.0805	0.6074	0.4588	0.5654	0.4683	1.9601	62.9149	114.93	2.6316	0.8923	1.6501	0.619	0.5884	0.8725	1.1064	0.6574	0.6664
904	octanoylcarnitine	Lipid	Carnitine metabolism	33936	LC/MS Pos	4100	288.3	123701	3671-77-0;			0.427	1.9834	0.7576	0.407	0.3751	0.4877	0.2224	1.3428	0.9681	0.5577	0.7436	7.1623	0.7023	0.7337	1.0458	0.5084	0.9359	0.6911	1.3761	0.5853	0.5368	0.2632	0.7759	0.8624	1.7419	1.1902	1.1454	1.0244	1.4998	0.8247	2.1654	0.9755	0.5789	5.6566	0.9756	0.7014	0.8015	3.6549
1531	ofloxacin	Xenobiotics	Drug	21320	LC/MS Pos	2608	362.1	32885974583	82419-36-1;	C07321	HMDB01929	1	1	1	1	1	1	1	1	1	1	1	1	1	1	1	1	1	1	1	1	1	1	1	1	1	1	1	1	1	1	1	1	1	1	1	1	1	1
708	oleate (18:1n9)	Lipid	Long chain fatty acid	1359	GC/MS	1984.4	339.2	445639	112-80-1;	C00712	HMDB00207	0.9513	0.9084	0.7267	0.5455	0.2828	0.638	0.5245	0.7581	0.968	1.4249	0.6393	0.3707	0.5015	1.1156	0.6693	0.5107	0.6423	0.5486	2.1888	2.0998	0.2383	0.414	0.3464	1.4351	2.0486	0.5022	2.1737	1.6077	1.9279	1.4592	1.217	0.5966	0.3173	2.5461	1.7657	1.5089	0.5909	1.9558
914	oleoylcarnitine	Lipid	Carnitine metabolism	35160	LC/MS Pos	5202	426.4				HMDB05065	0.6935	1.0939	1.3141	0.9062	0.4105	0.1457	0.7386	0.604	1.1109	0.4877	0.3634	1.0067	0.9409	0.1457	0.2298	0.4269	1.5872	0.1457	1.347	1.1122	0.9558	0.5437	0.9061	0.6436	0.7839	2.8225	0.709	1.1493	0.946	0.9393	1.293	0.8543	1.5591	0.9933	1.2387	1.3712	2.5307	3.9515
1628	omeprazole	Xenobiotics	Drug	38600	LC/MS Neg	4643.8	344.1	4594	73590-58-6;	D00455,D01207,D04056,D05259,C07324	HMDB01913	0.535	0.535	0.535	1.0065	0.535	0.535	0.535	0.535	2.0947	0.535	0.535	0.9935	0.535	0.535	0.535	0.535	0.535	0.535	0.535	0.535	0.535	0.5608	0.535	0.535	0.535	0.535	0.535	0.535	0.535	0.535	2.163	0.535	0.9641	0.535	0.535	0.87	1.0128	0.535
258	ornithine	Amino acid	Urea cycle; arginine-, proline-, metabolism	35832	GC/MS	1940.3	174.1	6262	3184-13-2;	C00077	HMDB03374	0.7418	1.1272	1.0681	1.2795	1.2121	1.8934	1.6153	0.2232	0.7578	0.4952	1.2667	0.8379	1.0462	0.7895	0.6163	0.3607	1.3162	1.6646	0.6413	0.9955	1.7878	1.1352	0.6677	1.5074	1.0334	0.268	0.5078	1.162	0.4678	0.779	0.8158	0.9319	1.0045	1.2212	0.7706	0.7543	1.02	0.9278
1622	oseltamivir impurity	Xenobiotics	Drug	40447	LC/MS Pos	3223	285.2	449381				1	1	1	1	1	1	1	1	1	1	1	1	1	1	1	1	1	1	1	1	1	1	1	1	1	1	1	1	1	1	1	1	1	1	1	1	1	1
611	oxalate (ethanedioate)	Carbohydrate	Glyoxylate and dicarboxylate metabolism	41891	GC/MS	1175.1	219	3819775971	144-62-7;	C00209	HMDB02329	0.6193	1.0711	1.164	1.1818	1.1513	0.5626	1.789	0.9764	1.013	0.9909	1.1124	1.7509	1.2898	1.194	0.8341	1.313	1.5757	1.6448	0.4937	1.2079	1	0.2171	0.4601	0.2171	0.8116	0.2171	0.3777	0.4034	0.5532	0.2171	1.1553	0.9342	1.0823	0.7795	1.0091	1.0819	0.5525	0.9605
1542	p-acetamidophenylglucuronide	Xenobiotics	Drug	33423	LC/MS Neg	1377	326.1	4022661	120595-80-4;		HMDB10316	0.0264	0.0264	0.0264	0.0264	0.0264	0.0264	0.0264	0.0264	0.0264	0.0264	0.5468	0.0264	0.0264	0.0264	7.7357	0.0888	0.0264	0.0264	0.0264	0.0264	1.9112	0.0264	0.0264	0.0264	0.0264	0.0264	1.5338	0.0264	0.0264	0.0264	0.0264	0.0264	0.0264	0.0264	0.0264	0.0264	0.0264	0.0264
94	p-cresol sulfate	Amino acid	Phenylalanine & tyrosine metabolism	36103	LC/MS Neg	2896	187.1	4615422	3233-57-7;	C01468		0.0979	2.1564	0.1108	3.3467	15.0358	3.5532	1.5671	13.7748	1.9952	0.0186	0.588	1.3564	18.2138	1.7212	3.937	0.7055	1.6434	0.8769	0.3075	1	2.2641	1.791	3.2988	1.7901	0.0754	0.1237	3.7998	1.0916	0.0097	0.0437	0.5134	0.3114	0.7536	1.6401	0.0097	0.0097	0.0884	0.3007
701	palmitate (16:0)	Lipid	Long chain fatty acid	1336	LC/MS Neg	5619	255.3	985	57-10-3;	C00249	HMDB00220	0.889	0.9723	0.8999	0.7825	0.4107	0.9684	0.6547	0.9575	1.051	1.1446	0.8125	0.6195	0.6993	1.0987	0.8375	0.8432	0.7724	0.6767	1.3096	1.5571	0.5495	0.579	0.5622	1.5934	1.6532	0.5758	1.1058	1.0286	1.1938	0.9874	1.0277	0.8	0.5918	1.8185	1.3379	1.2805	0.7605	1.0899
702	palmitoleate (16:1n7)	Lipid	Long chain fatty acid	33447	LC/MS Neg	5477	253.3	445638	373-49-9;	C08362	HMDB03229	0.9993	0.9837	0.8683	0.094	0.0673	0.366	0.094	0.3517	0.4711	1.2063	0.3642	0.1707	0.2045	1.0163	0.4912	0.6852	0.488	0.329	1.4978	1.3332	0.136	0.1439	0.2914	1.3916	1.8377	0.3562	1.5053	1.7444	1.4056	1.6123	1.8356	0.2709	0.1895	1.871	1.4288	1.6796	0.4545	1.3574
881	palmitoyl ethanolamide	Lipid	Endocannabinoid	38165	LC/MS Neg	6416	298.4	4671				0.862	0.9655	0.909	0.3589	0.646	1.1253	0.3589	0.3589	1.7515	1.2531	0.9949	0.3589	0.6926	0.7368	1	1	0.9208	0.3589	1.9011	0.7469	0.5874	0.4914	0.3589	1.3164	1.7254	0.8914	1.4941	0.9762	1.7035	1.3129	0.8263	0.7151	1.2478	1.7903	1.1007	1.6759	0.8966	0.8154
1086	palmitoyl sphingomyelin	Lipid	Sphingolipid	37506	GC/MS	2524	311.3	9939941				1.0846	1.0191	0.4507	1.6031	1.0041	0.7164	0.99	1.4021	0.9654	1.2796	0.77	0.8699	0.6472	0.5789	0.9991	0.5867	1.6941	0.6229	1.5478	1.2847	0.8933	0.9085	0.957	1.1139	1.2593	0.8205	2.0296	1.3777	0.9959	1.2144	0.6163	1.0236	1.1304	0.5868	1.0009	1.1346	1.3291	0.8715
912	palmitoylcarnitine	Lipid	Carnitine metabolism	22189	LC/MS Pos	5179	400.4	461	6865-14-1;	C02990		0.6296	1.2416	1.1283	1.6068	0.3577	0.1089	0.799	0.5875	1.0036	0.5019	0.5689	1.0882	0.7183	0.2843	0.2885	0.3717	1.0973	0.1027	1.3134	0.8564	0.9964	0.6277	0.9813	0.6382	0.7002	2.5054	0.8927	1.5452	0.6801	0.8968	1.0426	1.0187	1.5781	0.792	1.3819	1.8353	2.0364	2.8506
1600	pantoprazole	Xenobiotics	Drug	38609	LC/MS Neg	4401.1	382.1	4679	102625-70-7;	D05353,C11806	HMDB05017	0.0129	0.0129	0.0129	0.0129	0.0129	0.0129	0.0129	1.0597	0.0129	0.0129	0.0129	0.0129	0.0129	0.0129	0.6085	0.0129	0.0129	0.0129	0.0129	0.0129	0.0129	0.0129	0.0129	1.9384	0.0129	0.0129	0.0836	2.2307	0.0129	2.7719	0.0129	0.0129	0.0563	1	0.0129	0.0129	0.0129	0.0129
1347	pantothenate	Cofactors and vitamins	Pantothenate and CoA metabolism	1508	LC/MS Pos	2218	220.1	6613	137-08-6;	C00864	HMDB00210	0.5166	0.6048	0.9194	0.2575	1.2678	0.938	0.9974	0.7696	2.0782	1.1076	0.6993	2.1176	2.1102	0.7063	0.6311	0.5825	1.8832	1.0851	1.3115	0.5912	0.6494	0.3131	0.5283	0.3908	0.7617	0.5807	1.8523	0.8721	1.0042	1.3792	2.3183	0.649	0.8483	1.146	1.0026	2.5099	1.1316	1.9637
1798	paraxanthine	Xenobiotics	Xanthine metabolism	18254	LC/MS Pos	2444	181.2	4687	611-59-6;	C13747	HMDB01860	0.082	3.1056	0.4627	1.65	4.8792	3.0804	3.7535	1.2399	1.7933	0.082	3.7719	2.0157	3.95	3.096	1.6407	1.0554	3.592	4.6409	3.4613	1	4.833	0.9342	1.0157	1.283	0.6831	0.4374	0.1461	0.3635	0.1316	0.6933	0.2957	1	0.6626	1.4039	1.3378	0.3025	0.5508	0.082
1623	paroxetine	Xenobiotics	Drug	40461	LC/MS Pos	4222	330.2	43815	110429-49-8;	D02362,C07415		1	1	1	1	1	1	1	1	1	1	1	1	1	1	1	1	1	1	1	1	1	1	1	1	1	1	1	1	1	1	1	1	1	1	1	1	1	1
690	pelargonate (9:0)	Lipid	Medium chain fatty acid	12035	LC/MS Neg	4847	157.2	5461016	112-05-0;	C01601	HMDB00847	1.2576	1.3271	0.8246	1.2011	1.3085	1.8364	1.3423	1.2724	0.5549	1.005	2.25	0.945	1.0777	1.6339	0.4192	2.4087	1.3695	1.3845	1.5689	0.6987	0.7752	1.632	0.9874	1.0792	1.2906	0.85	0.7362	1.0483	0.8828	1.1137	0.3765	0.9026	0.4635	0.6651	1.3663	0.995	0.8234	0.6967
142	phenol sulfate	Amino acid	Phenylalanine & tyrosine metabolism	32553	LC/MS Neg	2150	173.1	74426	937-34-8;	C02180		0.1547	1.4036	0.7517	1.2875	2.1755	0.9655	0.9452	2.7685	0.807	0.367	1.0345	4.5067	7.9726	2.6537	1.0886	0.3276	0.5859	2.5744	0.1638	0.6777	1.0771	0.2841	1.122	0.5087	8.1574	0.1529	1.9753	0.4853	0.0923	0.2499	3.8615	2.8923	1.6291	5.457	0.0295	0.0577	0.2616	0.9033
92	phenylacetate	Amino acid	Phenylalanine & tyrosine metabolism	15958	LC/MS Neg	2127	135.1		103-82-2;	C07086	HMDB00209	0.5831	1.7922	0.5831	1.9704	0.9285	0.5831	0.7393	3.3559	0.5831	1.6236	0.5831	0.5831	1.528	0.5831	1.5854	0.5831	0.9678	0.5831	0.6127	0.5831	0.8864	0.6427	0.6438	1	1.7027	0.5831	2.3724	0.5831	0.5831	0.5831	1	0.5831	0.7902	0.5831	0.5831	0.5831	0.5831	0.5831
135	phenylacetylglutamine	Amino acid	Phenylalanine & tyrosine metabolism	35126	LC/MS Pos	2868	265.2	306137	28047-15-6;	C04148	HMDB06344	0.1371	0.9701	0.809	1.1848	4.9411	1.7626	1.5252	4.2708	0.2964	2.6096	0.721	2.6769	4.9968	1.4338	4.4223	0.3512	0.617	1.0299	0.5533	0.3267	1.8958	0.863	1.4949	0.5937	3.0344	0.2607	3.9812	0.2813	0.1441	0.2164	0.6711	1.4649	0.5012	1.8542	0.151	0.1018	1.5959	0.9667
89	phenylalanine	Amino acid	Phenylalanine & tyrosine metabolism	64	LC/MS Pos	2056	166.1	69256656140	63-91-2;	C00079	HMDB00159	0.7951	1.2677	0.9234	1.2525	0.559	0.9842	1.1771	1.0856	1.5073	0.674	0.9022	1.0745	0.9356	0.7363	0.6439	0.5552	0.9317	1.0009	0.8634	1.018	0.8548	1.2588	0.8693	1.3559	1.1618	1.0733	1.0563	1.6597	0.8773	0.88	0.9866	1.5953	0.982	1.0956	0.9991	0.744	0.9158	1.2827
428	phenylalanylleucine	Peptide	Dipeptide	40192	LC/MS Neg	4165.3	277.2	4078229	3303-55-7;			1.5145	2.0624	1.0721	0.4362	0.7619	2.6991	1.3542	1.2486	2.9286	7.8906	0.9279	0.4777	3.7969	0.5405	0.6331	1.1459	1.7245	1.5829	5.9546	0.3909	1.4806	0.3909	1.5005	1.1532	1	0.572	0.3909	0.3909	0.5637	0.5161	0.6438	0.3909	0.8197	0.3909	0.6128	0.7424	1.6835	0.3909
365	phenylalanylphenylalanine	Peptide	Dipeptide	38150	LC/MS Pos	3317	313.2	69930906993089	2577-40-4;			1.3726	4.161	1.161	0.9673	1.6315	4.2616	2.7082	1.4823	3.1206	7.8101	0.9343	2.073	4.5313	2.5262	0.5959	1.2386	1.4865	5.3879	5.8115	0.5426	1.7264	0.8065	3.1575	1.4903	0.9288	1.0327	0.482	0.9234	0.5761	0.4851	1.0657	0.2979	1.3187	0.1125	0.8446	0.9142	1.1765	0.4191
430	phenylalanylserine	Peptide	Dipeptide	40016	LC/MS Pos	1808	253.1	9859812	16053-39-7;			2.4536	1.3817	1.0562	1.2412	1.2953	1.2076	2.0454	0.9671	1.0034	2.2696	0.3063	1.6464	1.2294	1	0.7523	1.9835	1.8807	3.1764	1.0868	0.8666	1.1234	0.7982	0.7557	1.786	0.7748	0.9418	0.6753	0.5936	0.5518	0.9912	0.5715	1.1774	0.3564	0.4188	0.686	1.1422	1.7355	0.9966
454.93	phenylalanyltryptophan	Peptide	Dipeptide	41377	LC/MS Pos	3349	352.2		24587-41-5;			1.2892	1.9456	1.2553	1.2862	1.6584	2.1916	2.1942	1.4144	2.5007	1.7291	0.5913	0.8732	2.0409	0.7889	0.4344	1.3699	1.2612	1.0517	1.1528	1.0461	1.7139	1	1.3619	1	1.1672	0.1872	0.687	0.2775	0.2563	0.5157	0.1872	0.3345	0.3912	0.2029	0.1872	0.2858	0.9285	0.5412
88	phenyllactate (PLA)	Amino acid	Phenylalanine & tyrosine metabolism	22130	LC/MS Neg	2237	165.1	3848	828-01-3;	C05607	HMDB00779	0.3675	0.648	1.9545	1.4355	0.2004	0.3098	0.4623	0.6993	2.7251	0.558	0.5352	0.7319	0.2814	0.3612	0.7857	0.2339	0.7955	0.7897	0.2613	0.9532	0.5647	1.5557	0.3752	1.3475	1.0468	3.409	6.6172	2.3971	0.3391	1.7357	2.6936	3.417	4.0031	2.5116	0.6866	0.4938	3.6312	3.6644
671	phosphate	Energy	Oxidative phosphorylation	11438	GC/MS	1307.7	298.9	1061	7664-38-2 ;	C00009	HMDB01429	1.1085	0.8985	0.9354	1.2008	1.0331	1.2139	1.2519	1.5071	0.8456	1.3158	0.8238	1.0908	0.9357	1.4209	1.3991	0.7894	1.166	0.9547	1.3718	1.1733	1.1672	1.0936	1.1517	0.8037	0.8374	0.8745	1.3525	0.7558	0.7071	0.9871	0.896	0.8976	0.9592	1.3458	0.9445	0.9842	1.0129	0.841
80	pipecolate	Amino acid	Lysine metabolism	1444	LC/MS Pos	1120	130.1	849	4043-87-2;	C00408	HMDB00070	0.3427	0.1835	0.5324	1.1483	0.5606	0.4962	0.5934	0.2849	0.724	0.577	0.3694	0.2602	0.1833	0.2895	0.3177	0.6778	0.4397	0.3835	0.7454	0.3668	0.8916	2.2078	0.5179	0.4145	0.256	2.8147	2.7295	1.0211	1.0259	1.2011	1.8057	1.2168	2.7481	1.5076	1.9212	1.0993	3.9686	1.4269
1694	piperine	Xenobiotics	Food component/Plant	33935	LC/MS Pos	5136	286.2	638024	94-62-2;	C03882		1.1805	0.2448	2.3113	2.9793	1.2364	0.0654	0.185	1.7097	2.7123	8.5828	2.3729	1.8925	0.6906	0.8744	0.2806	1.497	3.5035	0.2777	1.1256	1.2483	0.6003	2.6111	2.9156	1.5197	0.2498	0.5669	0.2808	0.0654	0.0664	0.0958	0.0654	3.8613	0.8877	0.4526	0.2043	2.1778	2.1577	1
1591	pivaloylcarnitine	Xenobiotics	Drug	35432	LC/MS Pos	2370	246.2	126894				0.4314	0.4314	0.4314	0.4314	0.4314	0.4314	0.4314	0.4314	0.4314	0.4314	0.4314	0.4314	0.4314	0.4314	0.4314	0.4314	0.4314	0.4314	0.4314	0.4314	0.4314	0.4314	0.4314	0.4314	0.4314	0.4314	0.6777	0.4314	0.4314	0.4314	0.4314	0.4314	0.4919	1	0.4314	0.4772	0.4314	0.4314
1171	pregn steroid monosulfate*	Lipid	Sterol/Steroid	32619	LC/MS Neg	4998	397.3			C18044	HMDB00774	3.0942	1.3348	0.6907	1.132	3.1469	0.4388	3.0744	1.1011	0.8576	2.3918	1.2309	0.6107	1.2997	1.5938	0.2718	0.9532	1.0468	1.4035	1.1486	1.137	1.4787	0.945	1.9009	0.5191	1.0842	0.5654	4.8369	1.7968	1.8495	1.1699	0.3104	0.456	0.4597	5.157	0.4101	0.2607	0.6225	1.1775
1170	pregnen-diol disulfate*	Lipid	Sterol/Steroid	32562	LC/MS Neg	3886	238.3			C05484	HMDB04025	2.1076	0.6411	1.0092	0.5226	3.0769	0.5931	1.302	1.0294	1.0938	1.3432	1.4479	1.2196	0.6168	0.8739	0.0368	0.3997	0.3646	0.7821	0.7225	0.6252	1.1166	0.7295	2.2258	0.2629	1.0715	0.7063	3.5988	2.5378	1.4837	0.9706	0.9908	0.2994	3.2374	4.1518	0.4497	2.4945	0.3346	2.3741
1178	pregnenolone sulfate	Lipid	Sterol/Steroid	38170	LC/MS Neg	5089	395.3	105074	1247-64-9 ;		HMDB00774	1.9789	0.637	1.1405	1.4334	2.0788	0.5491	1.2888	1.1402	0.5594	2.4312	1.3711	0.7287	0.9729	1.3547	0.3686	1.9797	1.3535	0.6135	1.8525	0.8039	0.8475	1.7626	1.2894	0.4857	0.7606	1.0271	6.8544	1	2.1739	1.0291	0.7364	0.8743	1.1053	4.2358	0.4663	0.4688	0.3686	0.8086
363	pro-hydroxy-pro	Peptide	Dipeptide	35127	LC/MS Pos	960	229.2	11673055	18684-24-7;		HMDB06695	1.1054	0.4715	1.2525	0.6421	0.62	0.567	0.4174	0.6628	0.9303	0.4052	0.4782	0.947	0.8332	0.7322	0.9641	0.3761	0.4426	0.6574	0.6048	0.2609	0.4549	0.798	1.1031	0.4874	1.0848	1.3303	1.5175	0.5578	1.2231	1.0134	1.6512	1.5224	1.4269	5.3985	1.0359	2.0291	2.2403	1.1785
261	proline	Amino acid	Urea cycle; arginine-, proline-, metabolism	1898	LC/MS Pos	796	116.1	1457426971047	147-85-3;	C00148	HMDB00162	1.5708	1.2202	0.9382	1.3225	0.9723	1.2627	1.4298	0.8204	1.3127	0.9936	0.9015	1.204	1.0085	0.8487	0.8321	0.7082	0.9915	2.571	0.6049	2.0557	0.9774	1.0545	1.0289	1.8672	1.0463	1.2811	1.31	0.8909	0.3652	0.8835	0.628	1.3087	1.479	0.7394	0.9487	0.9523	1.6118	0.8068
348	prolylalanine	Peptide	Dipeptide	40705	LC/MS Pos	925	187.1	418041	6422-36-2;			1.1303	0.331	1.0082	0.7358	0.8119	0.6092	0.331	0.5106	0.7466	0.9918	0.5789	0.331	0.331	1.1299	1.2705	0.331	0.8399	0.7136	1.5057	0.5402	1.0539	0.8773	0.331	0.8817	1.0519	0.9481	1.1778	1.109	0.4279	0.8964	0.8017	0.7563	0.6461	1.8583	0.7731	1.1264	1.2333	1.9993
888	propionylcarnitine	Lipid	Fatty acid metabolism (also BCAA metabolism)	32452	LC/MS Pos	1589	218.2	107738	17298-37-2 ;	C03017	HMDB00824	0.3825	1.2106	0.7459	1.0897	1.2417	0.604	1.1654	2.1364	1.0984	0.6588	0.913	1.181	1.3866	0.8075	0.9856	0.5972	0.7869	1.0337	0.5687	0.5736	1.4475	1.2717	1.4196	0.4633	0.436	0.4235	1.3284	0.7137	0.288	0.9694	1.9243	1.3815	0.5494	2.1786	0.3308	0.2012	0.6404	3.9869
1280	pseudouridine	Nucleotide	Pyrimidine metabolism, uracil containing	33442	LC/MS Neg	1104	243.1		1445-07-4;	C02067	HMDB00767	0.5176	0.8167	1.8786	0.899	0.767	0.9074	0.6218	1.4046	1.2245	0.7774	0.8341	2.8529	0.9999	0.7247	0.8379	0.7637	0.6505	0.7895	0.633	0.6353	0.5983	0.6734	0.8565	0.6924	1.713	1.1992	2.4501	1.0593	0.9419	0.8286	2.6823	1.6308	1.6937	4.455	0.9407	1.4929	1.8055	3.0897
1389	pyridoxate	Cofactors and vitamins	Vitamin B6 metabolism	31555	LC/MS Neg	2210	182.1	6723	82-82-6 ;	C00847	HMDB00017	0.3052	0.2033	12.0141	0.4248	4.2951	0.6521	2.5899	0.6988	6.3903	0.7233	1.4959	4.7135	2.2713	1.0165	0.5816	0.4929	1	1.7841	0.2853	0.2212	0.4977	0.5346	0.9245	0.2385	0.2654	0.2033	0.7718	0.6062	0.3369	1.177	1.5552	1.4257	2.2964	5.2956	0.3401	1.5443	3.1607	4.0687
46	pyroglutamine*	Amino acid	Glutamate metabolism	32672	LC/MS Pos	764	129.2	134508				0.6424	1.143	0.5587	0.7391	1.0205	0.4221	0.4921	1.085	1.577	0.8969	0.6044	0.4908	1.4026	0.7032	1.2626	0.465	0.5367	0.9097	0.2588	0.4277	1.3351	0.5808	1.0903	0.5209	1.2402	0.9432	1.5238	1.8766	2.7692	0.9795	2.9472	1.3079	1.2914	6.5816	0.6419	2.2782	1.3158	1.3024
672	pyrophosphate (PPi)	Energy	Oxidative phosphorylation	2078	GC/MS	1642.3	451	644102	1466-09-3;	C00013	HMDB00250	1.0729	1.083	0.6949	0.95	0.8182	0.1258	2.0135	1.154	1.3134	3.8736	1.8123	2.1734	1.0794	0.5179	1.9945	0.7061	2.1939	0.9368	1.0305	1.151	1.0135	0.9695	2.7552	0.3583	0.562	0.5309	0.2835	0.5784	0.7747	0.4842	2.0636	0.7206	3.7307	4.99	0.6015	2.2426	2.1024	0.5091
603	pyruvate	Carbohydrate	Glycolysis, gluconeogenesis, pyruvate metabolism	599	GC/MS	1130.6	217	107735	127-17-3;	C00022	HMDB00243	2.0331	0.9102	0.2835	0.9874	0.7673	1.2998	1.1219	1.6331	0.6285	0.6596	0.5281	0.8673	1.2287	0.714	4.2859	1.0126	0.8662	0.3931	2.3107	0.6561	0.2194	0.9601	1.3471	1.2559	1.4741	1.6842	1.7741	1.0399	1.3901	2.1429	2.3934	0.8391	0.914	0.7923	0.7885	1.9533	1.0283	1.3997
1674	quinate	Xenobiotics	Food component/Plant	18335	GC/MS	1793	345.1		77-95-2;	C00296	HMDB03072	0.0364	0.4675	1.0155	0.0364	4.0117	8.214	7.9052	2.3211	1.9764	0.0364	9.6635	3.0557	1.4435	3.8181	0.2242	0.0496	1.2609	7.1712	0.9845	0.1294	2.7938	0.4962	0.0364	0.0364	0.0364	0.0364	0.0364	0.0364	0.0364	0.0364	0.7004	1.1692	0.1426	0.3372	0.4968	0.6515	0.7391	0.0364
1336	quinolinate	Cofactors and vitamins	Nicotinate and nicotinamide metabolism	1899	GC/MS	1697.7	296.1	1066	89-00-9;	C03722	HMDB00232	0.1571	0.1571	0.4374	0.1571	0.1571	0.1571	0.1571	0.1571	0.1571	0.1571	0.1571	0.1571	0.1571	0.1571	0.1571	0.1571	0.1571	0.1571	0.1571	0.1571	0.1571	0.1571	0.1571	0.1571	0.1571	0.7203	0.1571	0.1571	0.2605	0.1571	1.7605	1.3974	0.1571	7.2782	0.1571	0.1571	1	0.5325
1601	ranitidine	Xenobiotics	Drug	38595	LC/MS Pos	1967	315.1	3001055	66357-59-3;	D00422	HMDB01930	1	1	1	1	1	1	1	1	1	1	1	1	1	1	1	1	1	1	1	1	1	1	1	1	1	1	1	1	1	1	1	1	1	1	1	1	1	1
616	ribitol	Carbohydrate	Nucleotide sugars, pentose metabolism	15772	GC/MS	1692.4	217		488-81-3;	C00474	HMDB00508	0.6893	0.4752	0.9174	0.7839	0.6412	0.6596	0.7208	0.4561	0.9834	1.6347	0.3969	1.0752	0.6083	0.3838	0.5581	0.3838	0.3838	0.4843	0.525	0.6858	0.5078	0.3838	0.7534	0.8035	1.0166	1.2344	1.7077	0.7682	0.7739	1.1576	2.1557	1.2708	2.0083	1.9454	0.5197	1.0826	9.0387	1.7944
1366	riboflavin (Vitamin B2)	Cofactors and vitamins	Riboflavin metabolism	1827	LC/MS Pos	3111	377.2	493570	83-88-5;	C00255	HMDB00244	0.7072	0.7072	1	0.7072	0.7072	0.7072	1.144	0.7249	1.025	0.7072	2.8218	1.5064	0.7243	1.4023	0.7916	0.8497	0.7072	0.8624	0.8211	0.7072	0.749	0.7146	0.7091	0.7072	0.7072	0.7072	1.7787	1.8907	0.7072	0.7384	0.9964	1.7162	0.975	0.7072	0.7927	1.414	2.4906	1.8097
227	S-methylcysteine	Amino acid	Cysteine, methionine, SAM, taurine metabolism	39592	LC/MS Pos	869.1	136	705817424417	1187-84-4;		HMDB02108	1.3441	1.0832	0.724	0.9813	1.2546	0.6998	1.2019	0.6718	1.3222	1.2845	0.6464	1.1457	0.576	0.8996	0.863	0.5976	1.2274	0.926	1.8062	0.5827	1.5066	2.0294	1.4524	1.0187	0.7886	2.2223	1.0805	1.3635	0.7972	1.1944	0.6195	0.8252	0.8668	0.872	1.3874	0.9019	1.2315	0.6165
1668	saccharin	Xenobiotics	Food component/Plant	21151	LC/MS Neg	2013	182.1	5143	81-07-2;	D01085		0.1179	0.1179	0.1179	0.1179	0.1179	0.824	0.1179	1.1458	0.1179	0.1179	0.1179	3.08	0.1179	0.1179	3.7435	0.1179	0.1179	0.1179	0.1179	1.9793	1.4194	0.1179	0.1179	0.1179	0.1179	0.1179	0.1179	0.1179	0.1179	0.1179	0.1179	0.1179	0.702	0.1179	0.4448	0.1179	0.8542	0.1179
1533	salicylate	Xenobiotics	Drug	1515	LC/MS Neg	2226	137.1	338	69-72-7;	C00805	HMDB01895	0.4784	0.564	0.2441	0.2441	0.2441	1.3278	0.5494	35.7028	0.8365	23.1156	0.2957	39.3325	1.3775	0.2441	0.4865	537.022	1.0137	0.2441	0.2441	0.3297	3.3741	1	11.619	0.2441	1	0.2441	2.1167	0.2441	0.2441	0.2441	0.2441	0.2441	0.4948	0.2441	0.2441	0.2441	0.2441	0.2441
1534	salicyluric glucuronide*	Xenobiotics	Drug	33384	LC/MS Neg	1463	370.1					0.2044	0.2044	0.2044	0.2044	0.2044	0.47	0.2044	1.4447	0.2044	1	0.2044	8.0717	0.246	0.2044	0.2044	6.7971	0.2044	0.2044	0.2044	0.2044	0.2044	0.2044	4.4514	0.2044	0.2044	0.2044	0.4782	0.2044	0.2044	0.2044	0.2044	0.2044	0.2044	0.2044	0.2044	0.2044	0.2044	0.2044
979	scyllo-inositol	Lipid	Inositol metabolism	32379	GC/MS	1893.8	318.2		488-59-5;	C06153	HMDB06088	0.2826	0.1578	1.0064	1.3436	0.1578	0.2909	0.3853	0.6872	1.2296	1.3144	1.8737	5.8535	0.4475	0.6316	0.435	0.7197	1.2006	0.1578	1.2243	1	0.2709	0.6197	0.4422	0.1578	0.7786	0.6936	2.1948	0.197	0.2846	0.3644	0.472	0.9529	1.3239	2.3615	0.4712	0.9936	4.0018	2.1408
8	serine	Amino acid	Glycine, serine and threonine metabolism	32315	GC/MS	1656.3	320.2	59516857581	56-45-1;	C00065	HMDB03406	1.5449	1.3014	0.7124	1.6614	0.668	0.9077	1.369	1.2434	1.0353	0.642	0.7307	0.6545	1.2957	0.7298	0.7388	0.8486	1.3007	0.8215	1.0935	1.2483	1.2678	1.0853	0.7794	1.2134	0.9521	1.0702	0.4233	1.1116	0.512	1.1349	0.5454	1.5157	1.5765	0.6919	1.2817	1.0276	1.0557	0.6825
169	serotonin (5HT)	Amino acid	Tryptophan metabolism	2342	LC/MS Pos	1660	177.1	5202	153-98-0;	C00780	HMDB00259	0.7723	2.0037	0.2612	1	1.0756	0.6094	1.7075	1.7669	0.569	0.5255	0.5892	0.2612	1.3242	0.9866	4.7958	0.9906	0.7341	3.1033	0.553	1.2616	2.1961	1.2385	1.0134	1.6647	1.443	0.2612	0.4621	0.9436	0.8958	0.6164	1.8405	1.1598	1.1134	1.1993	0.2612	0.3669	0.2612	0.6452
1644	sertraline	Xenobiotics	Drug	39757	LC/MS Pos	4640.9	306.1	68617	79559-97-0;	D02360,C07246	HMDB05010	1	1	1	1	1	1	1	1	1	1	1	1	1	1	1	1	1	1	1	1	1	1	1	1	1	1	1	1	1	1	1	1	1	1	1	1	1	1
560	sorbitol	Carbohydrate	Fructose, mannose, galactose, starch, and sucrose metabolism	15053	GC/MS	1843	319.1	107428	6706-59-8;	C00794	HMDB00247	0.4695	0.1488	0.4489	1.7795	0.2106	0.4421	0.2696	0.1488	2.6945	0.8402	0.1488	0.3065	0.1488	0.1488	7.8372	0.6497	0.3639	0.1488	5.0714	39.4006	0.7533	0.1488	0.7641	0.2589	0.3268	1.827	0.6614	0.9445	0.5644	0.6594	1.7041	1.3223	3.6018	1.7628	0.8945	1.2305	4.1613	2.0126
1077	sphingosine	Lipid	Sphingolipid	17747	LC/MS Pos	5197	300.2	5353955	123-78-4;	C00319	HMDB00252	0.8805	0.5393	0.9985	2.0081	0.943	0.3928	0.3928	0.7976	0.7602	0.5302	0.5052	0.7238	0.7676	0.3928	0.3928	0.3928	0.3928	1.0015	1.1988	0.4661	1.0685	0.5971	1.1985	0.5343	0.3928	1.6553	0.3928	1.2435	0.8806	1	0.3928	0.7753	2.0859	0.3928	1.1516	1.7608	2.551	1.979
1753	stachydrine	Xenobiotics	Food component/Plant	34384	LC/MS Pos	860	144.1	115244	4136-37-2;	C10172	HMDB04827	0.0324	0.0887	2.4422	1.8482	0.1577	0.0995	0.0639	0.6446	1.5423	0.5914	3.5147	6.6436	0.0765	1.5333	0.0485	1.2944	1.7838	0.0586	0.1312	3.6537	0.0584	0.0522	0.48	0.0324	0.4646	0.7034	0.2865	0.7375	0.4065	0.849	1.738	2.7003	1.2822	1.1293	1.2625	2.0592	7.4934	1.3331
706	stearate (18:0)	Lipid	Long chain fatty acid	1358	LC/MS Neg	5886	283.4	5281	57-11-4;	C01530	HMDB00827	0.9715	0.9232	0.7863	1.0149	0.6407	1.0708	0.7468	1.3833	1.3468	1.1459	0.9889	0.593	0.9851	1.0927	1.0111	0.8099	0.8847	0.7417	1.6061	1.6219	0.7294	0.8372	0.6336	1.2537	1.5577	0.6834	1.0217	1.144	1.2432	0.8541	0.7406	1.0151	0.7871	1.7434	1.2083	1.1421	0.7542	1.1032
715	stearidonate (18:4n3)	Lipid	Long chain fatty acid	33969	LC/MS Neg	5381	275.3	5312508	111174-40-4 ;	C16300	HMDB06547	1.2981	0.9128	1.0114	0.3833	0.3703	0.8696	0.3454	0.6446	1.0386	1.0226	0.3745	0.7507	0.6857	1.8553	0.8613	0.6308	0.2158	1.0508	1.5462	3.2567	0.4522	0.2847	0.4413	1.8627	1.2808	0.5154	1.8551	1.6096	2.1993	0.9892	1.0121	0.3218	0.2158	1.2731	1.4707	1.3161	0.3228	1.5202
1087	stearoyl sphingomyelin	Lipid	Sphingolipid	19503	GC/MS	2645	311.3	6453725	85187-10-6;85187-10-6 ;	C00550	HMDB01348	1.1216	0.7565	0.3418	1.4273	1.728	0.93	1.2497	1.5757	0.7835	0.9686	0.8224	0.9941	0.7621	0.5832	1.4299	0.5035	1.2283	0.847	1.2567	1.2135	1.2378	1.0257	0.9743	0.8918	1.1315	0.6218	1.4404	1.3223	1.0059	0.978	0.6492	0.7094	1.1746	0.6214	1.268	1.4386	1.21	0.4681
913	stearoylcarnitine	Lipid	Carnitine metabolism	34409	LC/MS Pos	5300	428.4		18822-91-8;		HMDB00848	0.7785	0.8893	0.7142	2.2338	0.8328	0.3032	1.498	1.196	1.1198	0.3513	0.6056	1.616	1.2045	0.3746	0.3388	0.3032	1.2667	0.3032	1.5689	0.8802	1.7974	0.8433	1.5131	0.6596	0.6992	1.3302	0.9257	1.4007	0.4957	0.3032	0.8512	1.1725	1.8704	0.4063	1.0743	2.5986	1.3778	1.5481
659	succinate	Energy	Krebs cycle	1437	LC/MS Neg	618	117.1	1110	110-15-6;	C00042	HMDB00254	0.7732	0.9124	1.2298	0.9088	1.0886	0.8008	0.7796	1.1486	0.9694	0.9876	1.0124	1.0667	0.9129	0.7911	1.1374	1.1663	1.2456	0.8643	1.1992	1.0742	0.9225	0.7755	1.0167	1.068	0.931	1.0532	1.3484	0.8034	0.8159	1.3709	0.612	1.3866	0.9323	1.0306	0.7765	1.1826	0.9439	1.7965
660	succinylcarnitine	Energy	Krebs cycle	37058	LC/MS Pos	1401	262.1					0.5035	0.9551	1.1962	0.7743	0.7935	0.8116	0.7016	1.6773	1.2938	0.5035	1.0802	1.5585	0.5035	0.5035	1.1151	0.7271	0.5922	0.8689	0.5035	0.5035	0.8408	0.7957	0.8778	0.5035	1.528	1.0317	0.5835	1.0449	0.5035	0.9425	1.1411	1.286	0.904	2.607	0.6449	1.1304	1.0866	2.084
564	sucrose	Carbohydrate	Fructose, mannose, galactose, starch, and sucrose metabolism	1519	LC/MS Neg	875	341.2	5988	57-50-1;	C00089	HMDB00258	1	0.1847	1.4751	3.1084	1.6255	3.4289	0.7842	0.1847	0.7256	0.7504	0.4326	5.0096	0.5327	0.1847	0.2142	0.4747	1.5054	0.1847	0.1847	0.5713	0.6996	1.6146	0.2089	0.1847	0.8552	0.2562	0.7673	0.1847	0.1847	0.1847	1	2.4453	3.2733	31.6093	0.384	1.3328	9.413	1.7337
253	symmetric dimethylarginine (SDMA)	Amino acid	Urea cycle; arginine-, proline-, metabolism	36772	LC/MS Pos	794	203.1	169148	102783-24-4;	C03626	HMDB03334	0.5573	0.7666	0.9545	0.8352	0.5573	0.5573	0.9042	0.9349	0.5573	0.8858	0.9131	1.0519	1.0175	1	1.2579	0.5979	0.9644	0.5573	0.954	0.6364	0.9419	0.8551	0.5573	0.6207	1.3162	0.9825	0.5573	0.5573	0.8961	1.0444	1.3484	1.2453	1.14	1.3556	0.9885	1.7232	1.5341	1.3494
945	tauro-beta-muricholate	Lipid	Bile acid metabolism	33983	LC/MS Neg	4763	514.4	168408			HMDB00932	0.4704	1.0999	3.0255	1	0.1578	0.1978	0.1578	0.1578	0.849	1	0.2397	0.2096	0.1578	0.1578	0.1578	1.1748	3.6247	0.1578	0.7864	0.1975	0.1578	2.7357	0.1589	1.4958	0.4658	2.0034	0.692	0.9803	0.2397	0.172	3.3171	4.4102	8.3115	1.0286	0.9857	4.9821	1.1762	0.5773
922	taurochenodeoxycholate	Lipid	Bile acid metabolism	18494	LC/MS Neg	5218	498.3	387316	6009-98-9;	C05465	HMDB00951	1.5616	1.1817	0.8346	2.1646	0.0555	0.7903	0.1351	0.2397	1.1273	1.3363	0.5828	0.6834	0.015	0.0396	0.0885	1.0244	2.8045	0.3149	1.059	0.4247	0.0337	2.6788	0.3652	1.2195	0.3486	1.9941	0.3639	0.7688	0.3047	0.4921	6.0834	6.0603	3.5225	0.4776	2.9424	4.0828	3.1098	0.9756
920	taurocholate	Lipid	Bile acid metabolism	18497	LC/MS Neg	5122	514.3		145-42-6;	C05122	HMDB00036	1.0931	1.9907	1.0837	1.8709	0.042	0.5175	0.1395	0.3127	1.4637	1.6964	0.6185	0.7907	0.0209	0.0351	0.0758	1.2591	3.2803	0.657	0.6729	0.9069	0.0335	2.2674	0.4727	1.4979	0.2711	1.7869	0.0786	0.9163	0.2134	0.2926	6.8408	7.6185	4.9359	0.3844	3.3721	4.3893	3.3998	0.662
949	taurocholenate sulfate*	Lipid	Bile acid metabolism	32807	LC/MS Neg	4762	279.8					0.1267	0.1674	1.7493	1	0.1065	0.4565	0.145	0.5723	0.1886	0.6357	0.2859	0.5395	0.1513	0.1337	0.1033	1.3863	0.7481	0.1033	1.0727	0.178	0.1033	0.5238	0.157	0.6442	0.4277	8.734	1.9291	6.7955	3.3508	1.6195	2.458	1.3924	13.124	5.1852	1.5372	1.9814	6.0736	11.7819
934	taurolithocholate 3-sulfate	Lipid	Bile acid metabolism	38782	LC/MS Neg	5002	562.1	440071	64936-83-0;	C03642	HMDB02580	0.099	2.0141	0.3608	0.3513	0.9807	0.3875	0.4899	0.6737	0.4531	1.1656	1.3383	0.1269	0.5395	0.0537	0.0703	0.1518	3.3977	0.3557	2.2674	0.3936	0.0537	2.2703	0.6351	2.4194	0.5548	1.2857	7.41	1.3574	1.0762	0.8913	3.929	1.8467	2.9131	1.0131	0.6276	0.8344	3.4452	1
951	tauroursodeoxycholate	Lipid	Bile acid metabolism	39378	LC/MS Neg	5002.6	498.4		14605-22-2;		HMDB00874	2.7877	0.9196	0.3371	9.5799	0.1595	1.0221	0.3437	0.6204	2.0036	2.8141	0.4465	0.9916	0.1433	0.1433	0.7837	6.2763	3.3769	0.8436	2.3314	0.3291	0.2103	1.7425	0.6055	0.3737	1	3.9906	0.5191	1.0935	0.7593	0.3915	284.619	4.8118	2.2915	2.3129	1.0158	1.9519	1.976	0.4645
797	tetradecanedioate	Lipid	Fatty acid, dicarboxylate	35669	LC/MS Neg	3970	257.2	13185	821-38-5;		HMDB00872	0.4931	0.3598	0.8675	0.7579	0.2988	0.6046	0.4138	0.3657	0.5491	0.1386	0.3242	0.5622	0.4911	0.5076	0.9976	0.5417	0.4367	0.1386	0.67	1.0716	0.3339	0.1386	0.3271	0.6635	0.9659	2.7469	4.525	3.2109	2.6382	1.0341	9.177	1.5727	4.9222	2.7845	0.8871	4.1492	2.5631	1.5576
1799	theobromine	Xenobiotics	Xanthine metabolism	18392	LC/MS Pos	2136	181.1	5429	83-67-0;	C07480	HMDB02825	1.1094	1.832	3.3203	5.2179	1.1584	2.5387	0.8382	0.3843	1.5158	0.2966	2.0373	1	1.5012	0.8053	1.1066	1.2871	1.2919	0.7796	2.1661	0.7275	0.5758	0.3957	3.4825	1.6537	4.7247	0.2118	0.3834	2.3067	0.059	0.5525	0.1081	2.4361	0.3916	0.901	0.8934	0.3427	1.9587	0.04
1800	theophylline	Xenobiotics	Xanthine metabolism	18394	LC/MS Pos	2495	181.1	2153	58-55-9;	C07130	HMDB01889	0.1874	2.1383	0.6875	1.8278	1.8617	3.0615	1.8328	0.7224	1.3726	0.245	4.0134	1.3153	4.0393	1.5895	1.0046	0.4764	3.5176	2.3581	1.28	0.8371	2.4263	0.5797	0.9954	1.0195	0.6037	1	0.3391	0.4495	0.42	1.314	0.6704	2.2833	1.1294	1.0805	1.1065	1.2734	1.1771	0.397
617	threitol	Carbohydrate	Nucleotide sugars, pentose metabolism	35854	GC/MS	1513	217.1	169019	2418-52-2;	C16884	HMDB04136	0.4381	0.3631	2.7641	0.8344	0.601	0.7468	0.505	1.1317	2.1835	1.6426	0.4909	2.9049	1.2796	0.3421	1.2649	0.8019	0.2487	0.3774	0.2487	0.4315	0.5488	0.4485	1.0147	0.2877	1.0447	0.9553	2.6877	1.5033	1.6137	0.8362	1	2.46	1.2573	3.5147	0.5908	0.3711	1.4226	7.5474
1300	threonate	Cofactors and vitamins	Ascorbate and aldarate metabolism	27738	GC/MS	1560.7	292.1	151152	70753-61-6;	C01620	HMDB00943	0.1631	1.0393	2.7633	1.0596	1.6203	0.6928	4.9237	0.8752	1.0957	1.4453	2.9554	2.2171	1.8568	2.379	0.4497	2.978	3.7562	2.5688	0.9349	2.0829	0.9404	0.3781	0.1928	0.2833	0.3837	0.1083	0.3474	0.2558	0.607	0.5994	1.5595	0.9607	2.1655	0.8207	0.5209	1.7036	0.9293	1.58
17	threonine	Amino acid	Glycine, serine and threonine metabolism	1284	LC/MS Pos	713	120.1	69710196288	72-19-5;	C00188	HMDB00167	1.1649	1.4586	0.693	1.0632	0.9538	1.0506	1.0091	0.5258	0.3809	0.8045	0.8384	0.3472	0.2911	0.6315	0.9331	1.1885	0.9622	0.5355	0.9909	1.0506	0.9363	1.3559	1.1386	1.6775	0.8493	1.3366	0.7959	1.226	0.6013	1.2235	0.5889	1.0152	1.1925	0.2888	1.4098	1.2219	1.416	0.3367
1727	thymol sulfate	Xenobiotics	Food component/Plant	36095	LC/MS Neg	4395	229.1			C09908	HMDB01878	0.5379	27.981	7.5068	8.7838	1.9611	1.1815	0.265	0.8306	17.6085	1.2164	0.9244	0.7826	1.1609	0.8107	0.3582	2.8062	1.4258	2.3	4.5976	0.4851	0.6471	2.2873	0.9893	1.716	4.6269	0.265	2.8199	0.6501	0.265	0.3096	1.0107	0.4199	2.0743	0.841	0.8185	0.4692	6.8497	0.3241
217	tiglyl carnitine	Amino acid	Valine, leucine and isoleucine metabolism	35428	LC/MS Pos	2317	244.1		64191-86-2;		HMDB02366	0.5341	0.5341	1.2937	0.5893	0.583	0.6032	1.1747	1.6792	1.0097	0.9375	0.905	1.772	1.0885	1.6197	0.6875	1.2589	0.5341	0.5341	0.5341	0.6263	0.5341	0.6812	0.8767	0.5341	1.1469	0.5747	1.4796	0.7599	0.9195	0.8118	1.5647	2.3049	0.6083	3.2933	0.73	0.5341	1	13.0336
267	trans-4-hydroxyproline	Amino acid	Urea cycle; arginine-, proline-, metabolism	32306	LC/MS Pos	705	132.1	58106971053	51-35-4;	C01157	HMDB00725	1.4126	0.6609	1.7331	1.1838	1.4158	0.5407	0.9855	0.6724	0.8663	0.3506	0.6337	0.742	0.4174	0.6751	1.0753	0.8516	0.5986	0.6718	0.6823	0.8581	0.8869	1.5286	0.5844	1.0953	1.4485	1.321	0.9037	0.4565	0.918	0.9725	1.1765	1.0332	1.82	0.9591	1.2956	1.1423	2.3846	0.6912
55	trans-urocanate	Amino acid	Histidine metabolism	607	LC/MS Pos	1119	139.1	736715	104-98-3;	C00785	HMDB00301	2.6818	1.4183	1.2265	0.9225	1.3975	0.9247	2.0286	0.7361	0.4907	0.8632	0.9898	0.6679	1.3918	0.9236	0.8617	0.8494	0.6149	2.3371	2.0793	1.1875	0.7164	0.8714	0.9052	0.6111	1.5693	2.0034	0.5616	1.118	0.8796	1.2731	0.8299	2.2982	0.7245	1.861	1	1.2306	0.6734	1.3201
1455	trizma acetate	Xenobiotics	Chemical	20710	GC/MS	1525	306.2	8129116218782	6850-28-8;	C07182		0.1467	0.1467	0.1467	0.1467	0.1467	0.1467	0.1467	0.1467	0.3032	0.1467	0.1467	0.1467	0.1467	0.1467	48.7952	0.1467	0.1467	0.1467	0.1467	70.7471	25.5299	0.1467	0.3178	0.1467	0.1467	0.1467	17.1382	1.9976	0.5383	0.3228	0.1467	0.1467	13.1276	30.2421	0.6851	0.1467	1.715	0.1467
153	tryptophan	Amino acid	Tryptophan metabolism	54	LC/MS Pos	2445	205.1	69235166305	73-22-3;	C00078	HMDB00929	1.2746	1.4952	0.7906	1.3693	1.0227	1.2947	1.4472	1.4852	1.3446	1.1161	1.0552	1.5046	1.3694	1.085	0.753	0.6783	1.1741	1.3428	0.6131	1.0477	1.3582	1.1645	1.4094	1.1078	0.565	0.9773	0.9289	0.7468	0.2468	0.8967	1.4252	2.0006	1.1735	0.9188	0.3753	0.2677	0.7259	1.2412
159	tryptophan betaine	Amino acid	Tryptophan metabolism	37097	LC/MS Pos	2464	247.1	442106	20671-76-5;	C09213		1.5968	2.1693	0.3388	4.1474	0.5546	1.9862	7.9719	2.1782	0.3384	1.703	2.4605	1.44	2.9087	0.5928	0.9455	0.2603	0.4461	3.05	2.0598	2.2538	0.8828	0.6205	2.1973	0.9038	1.0564	1.0133	0.396	0.4847	0.2514	3.1525	0.5267	0.8212	0.2567	0.0913	2.1832	0.1353	0.206	1.0832
106	tyrosine	Amino acid	Phenylalanine & tyrosine metabolism	1299	LC/MS Pos	1516	182.1	60576942100	60-18-4;	C00082	HMDB00158	1.2096	1.4939	1.089	1.8148	0.5285	0.9879	0.9453	0.87	1.2169	0.9437	1.1416	1.2675	0.7332	0.5239	0.4458	0.5795	1.9624	0.9159	1.0959	1.2217	0.7203	1.2816	0.8185	1.6661	1.0726	0.7948	0.8364	1.0866	0.58	1.2528	1.0121	1.9495	0.9181	1.0531	0.8793	0.6392	0.8729	1.4164
692	undecanoate (11:0)	Lipid	Medium chain fatty acid	12067	LC/MS Neg	5207	185.2	8180	334-48-5;		HMDB00947	1.2805	0.9263	0.9888	0.8982	1.2594	1.018	1.3791	0.9196	1.1228	0.9358	1.2272	0.8395	1.1815	1.3146	0.6821	1.6669	0.9076	1.1777	1.0444	1.1666	1.2504	0.8749	0.6718	1.6075	1.055	0.9901	1.0112	1.36	1.6292	1.0099	0.7119	0.7623	0.7878	0.7031	1.3284	1.0238	0.7937	0.744
1247	urate	Nucleotide	Purine metabolism, urate metabolism	1604	LC/MS Neg	769	167.1		69-93-2;120K5305;	C00366	HMDB00289	0.8507	0.9378	1.2946	1.0112	1.1963	0.9466	0.8761	1.9057	1.0565	0.7822	1.2168	1.3255	1.1078	1.0487	1.1068	1.4244	1.0111	1.0681	0.5622	0.6884	0.9889	0.7948	1.0229	0.6458	1.3721	0.5232	0.8781	0.9771	0.3958	0.5796	1.1202	0.7655	0.8136	1.1478	0.5655	1.1398	1.244	0.8331
260	urea	Amino acid	Urea cycle; arginine-, proline-, metabolism	1670	GC/MS	1223.9	171	117616150869	57-13-6;	C00086	HMDB00294	0.1093	0.5454	1.8225	1.4893	0.7546	0.8593	1.0725	2.3382	1.2032	1.1275	0.7763	2.9025	1.6152	1.4268	0.9897	0.5565	0.5488	0.7005	0.3115	0.9543	0.7299	0.7679	0.4005	0.9028	1.1652	0.6784	2.0287	1.0103	0.4109	0.6992	3.1588	2.5955	1.1783	5.1337	0.5016	0.4395	1.0457	5.6845
1279	uridine	Nucleotide	Pyrimidine metabolism, uracil containing	606	LC/MS Neg	1430	243.1	6029	58-96-8;	C00299	HMDB00296	0.9036	1.3415	0.8703	0.5614	1.051	1.2743	1.0506	1.249	0.9499	1.8165	0.865	0.707	1.5055	1.613	0.7608	0.5572	1.1716	1.3339	1.5018	1.319	1.0317	0.4547	0.6993	0.8811	0.8419	0.8542	0.4167	0.5241	0.7182	0.982	1.1635	0.8504	1.1176	0.3884	1.289	0.7693	0.866	1.0009
1323	urobilinogen	Cofactors and vitamins	Hemoglobin and porphyrin metabolism	32426	LC/MS Neg	4181	591.3	26818	14684-37-8 ;	C05790	HMDB04157	1.7364	0.0771	3.1397	2.0685	0.0771	0.4345	0.1293	0.1113	0.3097	1.059	0.3138	1.2233	0.1426	0.2168	0.941	7.8489	4.5372	0.0771	2.8664	1.8832	0.6257	1.3096	0.2934	0.7767	0.6419	0.6196	11.5216	1.9203	3.3143	0.0771	1.81	15.9584	19.848	5.6546	0.5515	0.0896	0.0771	0.0771
684	valerate	Lipid	Short chain fatty acid	33443	LC/MS Neg	1774	101.2	7991	109-52-4;	C00803	HMDB00892	1.003	2.0835	0.4738	1.1078	0.949	1.4918	1.6669	3.1879	0.5517	0.6051	1.7266	0.6091	0.8918	1.1759	0.6361	1.1917	1.4197	1.3791	1.2826	1.2706	1.7	1.6897	1.0121	1.9812	0.6521	1	2.389	0.7309	0.6881	1.124	0.3453	0.4317	0.5113	1.0923	0.5416	0.6938	0.5306	0.7043
200	valine	Amino acid	Valine, leucine and isoleucine metabolism	1649	LC/MS Pos	1040	118.1	69710186287	72-18-4;	C00183	HMDB00883	1.2291	1.1452	0.5981	0.9894	1.1061	1.4279	1.6343	1.239	1.3198	1.1058	0.9768	1.069	1.4493	1.4123	0.9678	0.9187	0.7548	1.4429	0.7596	0.8388	1.3141	1.1253	1.02	1.1805	0.8093	0.904	0.98	1.4145	0.6599	1.1587	0.7449	1.0458	0.7513	1.1261	0.8231	0.5204	0.9612	1.0555
368.9	valylarginine	Peptide	Dipeptide	42072	LC/MS Pos	794.2	274.2	4266827	37682-75-0;			1.9856	1.8149	0.9969	1.2301	0.9278	2.0778	1.924	0.7527	1.7998	1.3503	0.5484	0.7501	1.6286	0.8605	0.5273	1.6643	1.1386	1.2817	2.5597	0.6765	1.8256	1.0031	1.9902	1.8874	1.0208	2.0285	0.4752	0.645	0.4776	1	0.1804	0.6713	0.5549	0.1804	1.2989	1.3359	1.0764	0.4886
1769	vanillin	Xenobiotics	Food component/Plant	37442	LC/MS Neg	2320	151.1		121-33-5;	C00755	HMDB12308	1.0424	1.5695	0.5657	1	0.8028	1.6591	1.2306	1.3198	0.6339	1	2.6104	1.0902	1.0087	0.7274	1.5519	1.5855	1.0992	1.155	1.0759	0.7662	0.7561	0.8929	0.9072	0.8141	1.0293	1.0473	0.8169	0.4793	0.8622	0.7262	0.9309	1.2096	0.4036	0.9907	0.4036	0.4036	1.8073	0.8629
1187	xanthine	Nucleotide	Purine metabolism, (hypo)xanthine/inosine containing	3147	GC/MS	1889.9	353	1188	69-89-6;	C00385	HMDB00292	0.6244	1.1331	0.6738	0.532	1.0337	1.1882	0.7008	2.2817	1.2667	10.7156	1.3934	0.7449	1.0308	1.1341	0.8735	0.5905	1.0675	0.9255	1	0.6031	0.4993	0.3614	0.313	0.9692	1.069	0.8636	0.3439	1.6585	1.3073	0.4026	1.1995	1.4294	1.0867	1.0424	0.6745	0.9987	0.881	1.4018
633	xylitol	Carbohydrate	Nucleotide sugars, pentose metabolism	4966	GC/MS	1677.6	307.2	6912	87-99-0;	C00379	HMDB00568	0.564	0.3878	0.3115	0.732	0.4712	0.4935	0.1797	0.8988	0.5091	3.3771	0.2181	0.1797	0.3316	0.1797	0.1797	0.9256	0.5162	0.8171	0.1797	0.1797	0.6786	0.1797	0.3705	0.3484	0.3375	2.0479	1.495	1.6478	1.0744	3.6056	1.3172	0.8715	1.2447	4.3457	0.4336	1.2606	1.3915	1.844
638	xylonate	Carbohydrate	Nucleotide sugars, pentose metabolism	35638	GC/MS	1722	292	6602431	73686-31-7;	C05411		0.5732	0.2224	1.0227	0.4901	0.3415	0.9773	0.5059	0.5598	1.1314	0.8502	0.6807	2.2867	0.5653	0.2224	0.3087	0.6218	0.4748	0.2224	0.7441	0.2224	0.4107	0.405	0.4091	0.3127	0.4721	3.5151	2.3121	2.1756	0.681	1	3.5998	2.0296	2.2532	4.1037	0.5556	1.6941	1.2752	3.4871
637	xylose	Carbohydrate	Nucleotide sugars, pentose metabolism	15835	GC/MS	1723.9	204	95259	609-06-3;	C00181	HMDB00098	0.66	0.2628	5.4108	0.9286	0.3055	0.826	0.2628	0.5781	1.8012	4.1767	0.2919	1	0.8631	0.3618	0.6875	0.4663	0.5752	0.3293	0.6352	0.3279	0.2628	0.5991	0.7663	0.2628	1.0099	1.2234	0.6898	0.8273	1.2417	0.4267	6.6159	2.9099	1.5677	3.5547	0.9319	1.0681	1.0835	1.6
[truncated: 12 more columns]
